# Supplementary material for: Integrative analysis of RNA, translation, and protein levels reveals distinct regulatory variation across humans
Source: Genome Res. 2015 Nov;25(11):1610–21. doi: 10.1101/gr.193342.115 (PMC4617958; doi:10.1101/gr.193342.115)
Supplement: Supplemental Material [file supp_gr.193342.115_TableS1.xlsx]

## Sheet: Cluster4
# species: Homo sapiens
# support: EXP, IMP, ISS, ISM, TAS, IEA, IBA, IRD, IDA, IGI, ISO, IGC, NAS, IBD, IPI, IEP, ISA, RCA, IC, IKR
# associations retrieved on: 2014-07-24 13:37:57-04
# gofunc built on: 2013-10-27 21:51:15.890197-04
# gene associations file: ftp://ftp.geneontology.org/pub/go/gene-associations/gene_association.goa_human.gz
# revision: 0
# downloaded on: 2013-10-27 16:13:44-04
# GO DAG files from: http://archive.geneontology.org/latest-full/go_201310-assocdb-tables.tar.gz
# downloaded on: 2013-10-17 16:47:31-04
# translation required: yes
# translation info:
# authority: ensembl
# synergizer db built on: 2012-02-05 16:36:50.758813-05
# synergizer db built from: Ensembl Genes 65 / Ensembl Metazoa Genes 12 / Ensembl Plants Genes 10
# namespace: ensembl_gene_id
# coverage: 99.6%
# size of "genespace": 3279
# number of attributes: 10471
# NOTE: these associations have been restricted to the genes included
# in the user-supplied gene space.
# NOTE: the last record consists of all the entities in the
# "genespace" that are not associated with any attribute (for
# the requested support).
# Original number of entities in query: 449
# Number of entities in query: 449
# Total number of entities: 3279
# Total number of attributes: 10471
# Original total number of attributes: 17521
# Translation required: yes
# Translation coverage: 0.995851
# Mode: unordered
# Number of simulations: 1000
# Adjusted P-value cutoff: 0.05
# Over/under: over
# Evidence codes: EXP, IMP, ISS, ISM, TAS, IEA, IBA, IRD, IDA, IGI, ISO, IGC, NAS, IBD, IPI, IEP, ISA, RCA, IC, IKR
OVERREPRESENTED ATTRIBUTES
N	X	LOD	P	P_adj	attrib ID	attrib name
13	26	0.80988	9.56988e-06	0.012	GO:0019827	stem cell maintenance
17	41	0.666051	9.9206e-06	0.012	GO:0006338	chromatin remodeling
24	66	0.577248	2.4669e-06	0.001	GO:0045596	negative regulation of cell differentiation
20	57	0.550908	3.18305e-05	0.033	GO:0004842	ubiquitin-protein ligase activity
25	75	0.519494	9.28993e-06	0.012	GO:0051093	negative regulation of developmental process
41	125	0.518779	1.93154e-08	<0.001	GO:0016568	chromatin modification
42	137	0.475295	1.15877e-07	<0.001	GO:0006325	chromatin organization
61	205	0.468803	4.39022e-10	<0.001	GO:0051276	chromosome organization
52	197	0.386984	7.54167e-07	<0.001	GO:0008270	zinc ion binding
54	209	0.374925	9.5156e-07	<0.001	GO:0005694	chromosome
81	329	0.361434	1.27105e-08	<0.001	GO:0003677	DNA binding
44	176	0.349276	2.59917e-05	0.028	GO:0045893	positive regulation of transcription, DNA-dependent
56	230	0.339618	4.55886e-06	0.003	GO:0046914	transition metal ion binding
62	267	0.314009	7.22412e-06	0.011	GO:0006259	DNA metabolic process
274	1533	0.290381	4.6525e-11	<0.001	GO:0005634	nucleus
117	557	0.282789	1.02059e-07	<0.001	GO:0006351	transcription, DNA-dependent
102	482	0.278669	6.21513e-07	<0.001	GO:0006355	regulation of transcription, DNA-dependent
109	521	0.275419	4.1623e-07	<0.001	GO:0051252	regulation of RNA metabolic process
102	491	0.266918	1.60685e-06	0.001	GO:2001141	regulation of RNA biosynthetic process
201	1076	0.25795	8.51171e-09	<0.001	GO:0090304	nucleic acid metabolic process
116	583	0.247004	2.59772e-06	0.001	GO:2000112	regulation of cellular macromolecule biosynthetic process
126	643	0.242575	1.90219e-06	0.001	GO:0019219	regulation of nucleobase-containing compound metabolic process
278	1646	0.239412	5.3032e-08	<0.001	GO:0044260	cellular macromolecule metabolic process
166	884	0.237231	3.54485e-07	<0.001	GO:0044428	nuclear part
117	603	0.231214	8.8276e-06	0.012	GO:0032774	RNA biosynthetic process
120	620	0.231177	7.32943e-06	0.011	GO:0031326	regulation of cellular biosynthetic process
116	598	0.230523	9.93998e-06	0.012	GO:0010556	regulation of macromolecule biosynthetic process
139	733	0.22793	3.2509e-06	0.001	GO:0003676	nucleic acid binding
120	626	0.224882	1.21856e-05	0.012	GO:0009889	regulation of biosynthetic process
140	745	0.222329	5.09185e-06	0.004	GO:0031981	nuclear lumen
121	637	0.219428	1.77418e-05	0.023	GO:0010468	regulation of gene expression
129	684	0.218835	1.20571e-05	0.012	GO:0051171	regulation of nitrogen compound metabolic process
285	1734	0.218573	7.17043e-07	<0.001	GO:0043170	macromolecule metabolic process
169	940	0.207663	6.00272e-06	0.006	GO:0016070	RNA metabolic process
132	717	0.204258	3.39946e-05	0.036	GO:0006996	organelle organization

## Sheet: Cluster5
# species: Homo sapiens
# support: EXP, IMP, ISS, ISM, TAS, IEA, IBA, IRD, IDA, IGI, ISO, IGC, NAS, IBD, IPI, IEP, ISA, RCA, IC, IKR
# associations retrieved on: 2014-07-24 13:38:48-04
# gofunc built on: 2013-10-27 21:51:15.890197-04
# gene associations file: ftp://ftp.geneontology.org/pub/go/gene-associations/gene_association.goa_human.gz
# revision: 0
# downloaded on: 2013-10-27 16:13:44-04
# GO DAG files from: http://archive.geneontology.org/latest-full/go_201310-assocdb-tables.tar.gz
# downloaded on: 2013-10-17 16:47:31-04
# translation required: yes
# translation info:
# authority: ensembl
# synergizer db built on: 2012-02-05 16:36:50.758813-05
# synergizer db built from: Ensembl Genes 65 / Ensembl Metazoa Genes 12 / Ensembl Plants Genes 10
# namespace: ensembl_gene_id
# coverage: 99.6%
# size of "genespace": 3279
# number of attributes: 10471
# NOTE: these associations have been restricted to the genes included
# in the user-supplied gene space.
# NOTE: the last record consists of all the entities in the
# "genespace" that are not associated with any attribute (for
# the requested support).
# Original number of entities in query: 573
# Number of entities in query: 573
# Total number of entities: 3279
# Total number of attributes: 10471
# Original total number of attributes: 17521
# Translation required: yes
# Translation coverage: 0.995851
# Mode: unordered
# Number of simulations: 1000
# Adjusted P-value cutoff: 0.05
# Over/under: over
# Evidence codes: EXP, IMP, ISS, ISM, TAS, IEA, IBA, IRD, IDA, IGI, ISO, IGC, NAS, IBD, IPI, IEP, ISA, RCA, IC, IKR
OVERREPRESENTED ATTRIBUTES
N	X	LOD	P	P_adj	attrib ID	attrib name
17	21	1.27613	3.21578e-10	<0.001	GO:0022624	proteasome accessory complex
9	12	1.11392	1.91459e-05	0.018	GO:0006541	glutamine metabolic process
26	38	1.01843	4.0504e-12	<0.001	GO:0006521	regulation of cellular amino acid metabolic process
28	43	0.957713	3.77011e-12	<0.001	GO:0033238	regulation of cellular amine metabolic process
32	50	0.940623	2.07819e-13	<0.001	GO:0000502	proteasome complex
26	41	0.924524	5.58796e-11	<0.001	GO:0006977	DNA damage response, signal transduction by p53 class mediator resulting in cell cycle arrest
26	41	0.924524	5.58796e-11	<0.001	GO:0072395	signal transduction involved in cell cycle checkpoint
26	41	0.924524	5.58796e-11	<0.001	GO:0072401	signal transduction involved in DNA integrity checkpoint
26	41	0.924524	5.58796e-11	<0.001	GO:0072413	signal transduction involved in mitotic cell cycle checkpoint
26	41	0.924524	5.58796e-11	<0.001	GO:0072422	signal transduction involved in DNA damage checkpoint
26	41	0.924524	5.58796e-11	<0.001	GO:0072431	signal transduction involved in mitotic G1 DNA damage checkpoint
26	41	0.924524	5.58796e-11	<0.001	GO:1902400	intracellular signal transduction involved in G1 DNA damage checkpoint
26	41	0.924524	5.58796e-11	<0.001	GO:1902402	signal transduction involved in mitotic DNA damage checkpoint
26	41	0.924524	5.58796e-11	<0.001	GO:1902403	signal transduction involved in mitotic DNA integrity checkpoint
27	43	0.914092	3.29197e-11	<0.001	GO:0071158	positive regulation of cell cycle arrest
29	47	0.896162	1.12219e-11	<0.001	GO:0002479	antigen processing and presentation of exogenous peptide antigen via MHC class I, TAP-dependent
28	46	0.880388	4.12752e-11	<0.001	GO:0051352	negative regulation of ligase activity
28	46	0.880388	4.12752e-11	<0.001	GO:0051436	negative regulation of ubiquitin-protein ligase activity involved in mitotic cell cycle
28	46	0.880388	4.12752e-11	<0.001	GO:0051444	negative regulation of ubiquitin-protein ligase activity
26	43	0.871495	2.60582e-10	<0.001	GO:0031571	mitotic G1 DNA damage checkpoint
26	43	0.871495	2.60582e-10	<0.001	GO:0044783	G1 DNA damage checkpoint
14	23	0.866806	3.711e-06	0.003	GO:0006099	tricarboxylic acid cycle
30	50	0.866533	1.36219e-11	<0.001	GO:0042590	antigen processing and presentation of exogenous peptide antigen via MHC class I
27	45	0.864081	1.49592e-10	<0.001	GO:0044773	mitotic DNA damage checkpoint
12	20	0.849264	2.3422e-05	0.019	GO:0003724	RNA helicase activity
16	27	0.841181	1.211e-06	0.001	GO:0003697	single-stranded DNA binding
27	46	0.841056	3.03505e-10	<0.001	GO:0044774	mitotic DNA integrity checkpoint
27	46	0.841056	3.03505e-10	<0.001	GO:0071156	regulation of cell cycle arrest
28	49	0.814637	3.36471e-10	<0.001	GO:0030330	DNA damage response, signal transduction by p53 class mediator
29	51	0.810505	1.89052e-10	<0.001	GO:0031145	anaphase-promoting complex-dependent proteasomal ubiquitin-dependent protein catabolic process
29	51	0.810505	1.89052e-10	<0.001	GO:0051439	regulation of ubiquitin-protein ligase activity involved in mitotic cell cycle
26	46	0.802295	2.04233e-09	<0.001	GO:2000134	negative regulation of G1/S transition of mitotic cell cycle
27	48	0.798329	1.14487e-09	<0.001	GO:0051437	positive regulation of ubiquitin-protein ligase activity involved in mitotic cell cycle
23	41	0.792649	2.19125e-08	<0.001	GO:0009128	purine nucleoside monophosphate catabolic process
23	41	0.792649	2.19125e-08	<0.001	GO:0009158	ribonucleoside monophosphate catabolic process
23	41	0.792649	2.19125e-08	<0.001	GO:0009169	purine ribonucleoside monophosphate catabolic process
29	52	0.791458	3.58167e-10	<0.001	GO:0042770	signal transduction in response to DNA damage
35	64	0.77695	1.06334e-11	<0.001	GO:0002474	antigen processing and presentation of peptide antigen via MHC class I
15	27	0.776877	7.9878e-06	0.008	GO:0006096	glycolysis
29	53	0.773198	6.62788e-10	<0.001	GO:0051438	regulation of ubiquitin-protein ligase activity
22	40	0.772975	7.2828e-08	<0.001	GO:0006200	ATP catabolic process
23	42	0.769624	4.06071e-08	<0.001	GO:0009125	nucleoside monophosphate catabolic process
27	50	0.759376	3.89284e-09	<0.001	GO:0051443	positive regulation of ubiquitin-protein ligase activity
27	50	0.759376	3.89284e-09	<0.001	GO:2000045	regulation of G1/S transition of mitotic cell cycle
29	54	0.755662	1.19963e-09	<0.001	GO:0051340	regulation of ligase activity
30	56	0.75407	6.65172e-10	<0.001	GO:0010565	regulation of cellular ketone metabolic process
13	24	0.7517	4.72387e-05	0.047	GO:0030532	small nuclear ribonucleoprotein complex
27	51	0.741116	6.93219e-09	<0.001	GO:0051351	positive regulation of ligase activity
31	61	0.707178	1.92339e-09	<0.001	GO:0071013	catalytic step 2 spliceosome
30	59	0.707008	3.48409e-09	<0.001	GO:0072331	signal transduction by p53 class mediator
31	62	0.693005	3.22356e-09	<0.001	GO:0009308	amine metabolic process
31	62	0.693005	3.22356e-09	<0.001	GO:0044106	cellular amine metabolic process
30	60	0.692368	5.83926e-09	<0.001	GO:0031397	negative regulation of protein ubiquitination
28	56	0.691097	1.91353e-08	<0.001	GO:0042470	melanosome
28	56	0.691097	1.91353e-08	<0.001	GO:0048770	pigment granule
25	50	0.689201	1.13132e-07	<0.001	GO:0051082	unfolded protein binding
18	36	0.684826	7.13722e-06	0.007	GO:0032069	regulation of nuclease activity
16	32	0.683588	2.33812e-05	0.019	GO:0009127	purine nucleoside monophosphate biosynthetic process
16	32	0.683588	2.33812e-05	0.019	GO:0009168	purine ribonucleoside monophosphate biosynthetic process
33	67	0.681348	1.61991e-09	<0.001	GO:0042180	cellular ketone metabolic process
24	49	0.671036	3.36308e-07	0.001	GO:0046034	ATP metabolic process
32	66	0.667384	4.77573e-09	<0.001	GO:0009126	purine nucleoside monophosphate metabolic process
32	66	0.667384	4.77573e-09	<0.001	GO:0009167	purine ribonucleoside monophosphate metabolic process
30	62	0.66446	1.56329e-08	<0.001	GO:0090068	positive regulation of cell cycle process
16	33	0.657873	3.81454e-05	0.04	GO:0043230	extracellular organelle
16	33	0.657873	3.81454e-05	0.04	GO:0065010	extracellular membrane-bounded organelle
16	33	0.657873	3.81454e-05	0.04	GO:0070062	extracellular vesicular exosome
555	2906	0.657007	1.10079e-14	<0.001	GO:0008150	biological_process
17	36	0.636887	3.35725e-05	0.039	GO:0006007	glucose catabolic process
34	73	0.635335	5.82972e-09	<0.001	GO:0009161	ribonucleoside monophosphate metabolic process
562	3051	0.630772	3.18573e-09	<0.001	GO:0005575	cellular_component
19	41	0.622814	1.617e-05	0.013	GO:0009124	nucleoside monophosphate biosynthetic process
28	61	0.620085	1.98275e-07	0.001	GO:0000077	DNA damage checkpoint
18	39	0.619074	2.9065e-05	0.03	GO:0009156	ribonucleoside monophosphate biosynthetic process
35	77	0.616269	7.70746e-09	<0.001	GO:0009123	nucleoside monophosphate metabolic process
28	62	0.607149	3.0301e-07	0.001	GO:0031570	DNA integrity checkpoint
18	40	0.599169	4.43871e-05	0.042	GO:0019320	hexose catabolic process
35	79	0.595972	1.76267e-08	<0.001	GO:0007050	cell cycle arrest
44	100	0.595773	3.07765e-10	<0.001	GO:0048002	antigen processing and presentation of peptide antigen
28	63	0.594577	4.57096e-07	0.001	GO:0031398	positive regulation of protein ubiquitination
25	57	0.582723	2.58734e-06	0.002	GO:0006986	response to unfolded protein
21	48	0.578827	1.74709e-05	0.015	GO:0022900	electron transport chain
21	48	0.578827	1.74709e-05	0.015	GO:0022904	respiratory electron transport chain
25	58	0.569399	3.81246e-06	0.003	GO:0035966	response to topologically incorrect protein
45	106	0.568599	8.0586e-10	<0.001	GO:0019882	antigen processing and presentation
30	70	0.567587	4.66576e-07	0.001	GO:0007093	mitotic cell cycle checkpoint
40	94	0.567579	6.80352e-09	<0.001	GO:0002478	antigen processing and presentation of exogenous peptide antigen
24	56	0.564558	6.75043e-06	0.007	GO:0043566	structure-specific DNA binding
38	90	0.560525	2.14076e-08	<0.001	GO:0000082	G1/S transition of mitotic cell cycle
25	59	0.556462	5.5466e-06	0.004	GO:0009986	cell surface
557	3005	0.552321	3.077e-09	<0.001	GO:0005623	cell
557	3005	0.552321	3.077e-09	<0.001	GO:0044464	cell part
40	96	0.5516	1.41516e-08	<0.001	GO:0019884	antigen processing and presentation of exogenous antigen
22	53	0.539731	3.02154e-05	0.031	GO:0003729	mRNA binding
30	73	0.536064	1.38466e-06	0.001	GO:1901988	negative regulation of cell cycle phase transition
30	73	0.536064	1.38466e-06	0.001	GO:1901991	negative regulation of mitotic cell cycle phase transition
34	83	0.535696	2.94659e-07	0.001	GO:0010948	negative regulation of cell cycle process
41	101	0.532645	2.29554e-08	<0.001	GO:0010498	proteasomal protein catabolic process
33	81	0.531144	5.15611e-07	0.001	GO:0045333	cellular respiration
38	94	0.527981	8.766e-08	<0.001	GO:0051325	interphase
38	94	0.527981	8.766e-08	<0.001	GO:0051329	interphase of mitotic cell cycle
65	165	0.523842	6.20085e-12	<0.001	GO:0043069	negative regulation of programmed cell death
37	92	0.52366	1.53023e-07	0.001	GO:0006457	protein folding
31	77	0.521421	1.56842e-06	0.001	GO:0000209	protein polyubiquitination
64	163	0.520817	1.09282e-11	<0.001	GO:0043066	negative regulation of apoptotic process
66	169	0.518003	6.70852e-12	<0.001	GO:0060548	negative regulation of cell death
553	2967	0.514662	1.91998e-09	<0.001	GO:0005622	intracellular
38	96	0.512545	1.69808e-07	0.001	GO:0043161	proteasomal ubiquitin-dependent protein catabolic process
32	82	0.499303	2.3936e-06	0.002	GO:0031396	regulation of protein ubiquitination
32	82	0.499303	2.3936e-06	0.002	GO:1901987	regulation of cell cycle phase transition
32	82	0.499303	2.3936e-06	0.002	GO:1901990	regulation of mitotic cell cycle phase transition
549	2922	0.498508	3.92372e-10	<0.001	GO:0003674	molecular_function
68	181	0.49086	2.57053e-11	<0.001	GO:0006520	cellular amino acid metabolic process
551	2955	0.489064	3.78416e-09	<0.001	GO:0044424	intracellular part
30	78	0.487995	7.05754e-06	0.007	GO:0006006	glucose metabolic process
59	157	0.486086	6.01882e-10	<0.001	GO:0006091	generation of precursor metabolites and energy
56	149	0.484549	1.70308e-09	<0.001	GO:0000377	RNA splicing, via transesterification reactions with bulged adenosine as nucleophile
56	149	0.484549	1.70308e-09	<0.001	GO:0000398	mRNA splicing, via spliceosome
38	100	0.483165	5.88467e-07	0.001	GO:0022403	cell cycle phase
40	106	0.479185	3.65045e-07	0.001	GO:0045786	negative regulation of cell cycle
46	123	0.475802	6.39115e-08	<0.001	GO:0015980	energy derivation by oxidation of organic compounds
535	2764	0.474065	8.00232e-13	<0.001	GO:0009987	cellular process
53	144	0.468067	1.13497e-08	<0.001	GO:0032269	negative regulation of cellular protein metabolic process
44	119	0.46675	1.84671e-07	0.001	GO:0031400	negative regulation of protein modification process
37	100	0.463867	1.7867e-06	0.001	GO:0005681	spliceosomal complex
56	154	0.461093	7.0499e-09	<0.001	GO:0000375	RNA splicing, via transesterification reactions
52	144	0.454152	3.33352e-08	<0.001	GO:0043086	negative regulation of catalytic activity
54	151	0.448364	2.62767e-08	<0.001	GO:0044770	cell cycle phase transition
54	151	0.448364	2.62767e-08	<0.001	GO:0044772	mitotic cell cycle phase transition
30	83	0.444566	2.95281e-05	0.031	GO:0048610	cellular process involved in reproduction
100	292	0.442867	2.52442e-13	<0.001	GO:0019752	carboxylic acid metabolic process
95	277	0.441034	1.0262e-12	<0.001	GO:0010941	regulation of cell death
34	95	0.43946	1.10825e-05	0.008	GO:0044421	extracellular region part
94	275	0.438114	1.73722e-12	<0.001	GO:0043067	regulation of programmed cell death
93	272	0.437745	2.29369e-12	<0.001	GO:0042981	regulation of apoptotic process
50	142	0.435622	1.58102e-07	0.001	GO:0005576	extracellular region
53	151	0.434888	7.38304e-08	<0.001	GO:0051248	negative regulation of protein metabolic process
101	301	0.429018	8.21543e-13	<0.001	GO:0043436	oxoacid metabolic process
33	94	0.425882	2.37701e-05	0.019	GO:0030036	actin cytoskeleton organization
101	303	0.42436	1.31914e-12	<0.001	GO:0006082	organic acid metabolic process
31	89	0.419755	5.01383e-05	0.049	GO:0000075	cell cycle checkpoint
36	104	0.417581	1.44692e-05	0.012	GO:0007346	regulation of mitotic cell cycle
36	105	0.411122	1.84495e-05	0.015	GO:0030029	actin filament-based process
40	119	0.399496	1.08476e-05	0.008	GO:0010564	regulation of cell cycle process
37	110	0.398708	2.3016e-05	0.018	GO:0044433	cytoplasmic vesicle part
61	185	0.396052	1.01518e-07	<0.001	GO:0055114	oxidation-reduction process
79	243	0.395296	2.15991e-09	<0.001	GO:0043085	positive regulation of catalytic activity
43	130	0.390014	8.02841e-06	0.008	GO:0016887	ATPase activity
55	172	0.372722	1.39242e-06	0.001	GO:0044092	negative regulation of molecular function
72	228	0.372178	4.87908e-08	<0.001	GO:0016023	cytoplasmic membrane-bounded vesicle
78	249	0.369625	1.85991e-08	<0.001	GO:0031988	membrane-bounded vesicle
75	239	0.369377	3.34092e-08	<0.001	GO:0031410	cytoplasmic vesicle
82	265	0.363298	1.4352e-08	<0.001	GO:0031982	vesicle
63	201	0.363008	4.99256e-07	0.001	GO:0008380	RNA splicing
88	286	0.362408	5.27123e-09	<0.001	GO:0044093	positive regulation of molecular function
71	230	0.356523	1.70601e-07	0.001	GO:0032270	positive regulation of cellular protein metabolic process
61	197	0.354066	1.23081e-06	0.001	GO:0031401	positive regulation of protein modification process
64	208	0.351212	8.43941e-07	0.001	GO:0034622	cellular macromolecular complex assembly
104	352	0.342825	2.11518e-09	<0.001	GO:0050790	regulation of catalytic activity
508	2618	0.341275	7.67205e-10	<0.001	GO:0005488	binding
114	393	0.335297	1.00588e-09	<0.001	GO:0012501	programmed cell death
73	246	0.331305	6.47814e-07	0.001	GO:0051247	positive regulation of protein metabolic process
111	385	0.329674	2.65e-09	<0.001	GO:0006915	apoptotic process
254	990	0.328621	1.93748e-15	<0.001	GO:0005829	cytosol
125	440	0.326552	5.58323e-10	<0.001	GO:0008219	cell death
125	440	0.326552	5.58323e-10	<0.001	GO:0016265	death
489	2471	0.325721	1.2969e-10	<0.001	GO:0005737	cytoplasm
219	838	0.319403	9.63799e-14	<0.001	GO:0036094	small molecule binding
93	325	0.316183	1.03045e-07	<0.001	GO:0010605	negative regulation of macromolecule metabolic process
206	790	0.309726	1.18788e-12	<0.001	GO:0000166	nucleotide binding
206	791	0.308779	1.3721e-12	<0.001	GO:1901265	nucleoside phosphate binding
61	212	0.306244	1.75684e-05	0.015	GO:0016491	oxidoreductase activity
104	372	0.305659	5.92594e-08	<0.001	GO:0016071	mRNA metabolic process
55	191	0.304429	4.5718e-05	0.043	GO:0051726	regulation of cell cycle
444	2149	0.304401	6.88e-12	<0.001	GO:0044237	cellular metabolic process
168	631	0.303485	7.28276e-11	<0.001	GO:0065008	regulation of biological quality
96	344	0.300898	2.36514e-07	0.001	GO:0009892	negative regulation of metabolic process
461	2281	0.300507	8.25366e-11	<0.001	GO:0008152	metabolic process
90	322	0.299317	5.6316e-07	0.001	GO:0031324	negative regulation of cellular metabolic process
105	381	0.296543	1.1512e-07	<0.001	GO:0032268	regulation of cellular protein metabolic process
112	413	0.288899	1.02208e-07	<0.001	GO:0065009	regulation of molecular function
74	268	0.284807	1.07902e-05	0.008	GO:0031399	regulation of protein modification process
194	764	0.283155	1.32914e-10	<0.001	GO:0044281	small molecule metabolic process
66	239	0.281807	3.39005e-05	0.039	GO:0006397	mRNA processing
174	678	0.280333	8.31098e-10	<0.001	GO:0048519	negative regulation of biological process
243	1001	0.277072	2.02722e-11	<0.001	GO:0031974	membrane-enclosed lumen
183	722	0.275983	7.42992e-10	<0.001	GO:0006950	response to stress
95	354	0.274707	2.00073e-06	0.001	GO:0065003	macromolecular complex assembly
237	975	0.274463	3.95234e-11	<0.001	GO:0043233	organelle lumen
129	492	0.273759	7.67892e-08	<0.001	GO:1901564	organonitrogen compound metabolic process
73	271	0.268537	3.19003e-05	0.032	GO:0006461	protein complex assembly
234	970	0.266707	1.44147e-10	<0.001	GO:0070013	intracellular organelle lumen
73	272	0.266181	3.65639e-05	0.04	GO:0070271	protein complex biogenesis
107	407	0.266098	1.17848e-06	0.001	GO:0051246	regulation of protein metabolic process
441	2185	0.264445	2.24348e-09	<0.001	GO:0071704	organic substance metabolic process
415	2006	0.264205	4.00607e-10	<0.001	GO:0005515	protein binding
187	752	0.264137	2.5697e-09	<0.001	GO:0043168	anion binding
433	2131	0.262923	1.54234e-09	<0.001	GO:0044238	primary metabolic process
159	629	0.262245	2.16933e-08	<0.001	GO:0048523	negative regulation of cellular process
154	610	0.259035	4.44282e-08	<0.001	GO:0042221	response to chemical stimulus
98	377	0.255063	6.35567e-06	0.005	GO:0033554	cellular response to stress
298	1315	0.255047	1.48727e-10	<0.001	GO:0050896	response to stimulus
320	1439	0.25354	1.67065e-10	<0.001	GO:0034641	cellular nitrogen compound metabolic process
413	2009	0.25335	1.81882e-09	<0.001	GO:0044444	cytoplasmic part
132	521	0.251797	4.80326e-07	0.001	GO:0005654	nucleoplasm
148	591	0.250714	1.63439e-07	0.001	GO:0032553	ribonucleotide binding
147	587	0.250283	1.83288e-07	0.001	GO:0032555	purine ribonucleotide binding
119	467	0.250267	1.53462e-06	0.001	GO:0002376	immune system process
146	585	0.24749	2.60274e-07	0.001	GO:0032550	purine ribonucleoside binding
146	587	0.245135	3.28863e-07	0.001	GO:0001883	purine nucleoside binding
147	592	0.244422	3.29682e-07	0.001	GO:0017076	purine nucleotide binding
114	450	0.244375	3.72482e-06	0.003	GO:0051704	multi-organism process
145	584	0.243501	4.13582e-07	0.001	GO:0035639	purine ribonucleoside triphosphate binding
325	1483	0.24324	8.43072e-10	<0.001	GO:0006807	nitrogen compound metabolic process
146	589	0.242788	4.14499e-07	0.001	GO:0032549	ribonucleoside binding
147	594	0.242092	4.15149e-07	0.001	GO:0001882	nucleoside binding
153	621	0.24159	2.94735e-07	0.001	GO:0097367	carbohydrate derivative binding
201	842	0.240977	2.14879e-08	<0.001	GO:0044710	single-organism metabolic process
361	1705	0.236525	3.51832e-09	<0.001	GO:0065007	biological regulation
311	1416	0.235297	2.79839e-09	<0.001	GO:1901360	organic cyclic compound metabolic process
297	1339	0.235	3.17583e-09	<0.001	GO:0006139	nucleobase-containing compound metabolic process
92	364	0.234589	4.36655e-05	0.042	GO:0022402	cell cycle process
303	1380	0.229629	6.63776e-09	<0.001	GO:0046483	heterocycle metabolic process
109	439	0.229195	1.75743e-05	0.015	GO:0022607	cellular component assembly
301	1373	0.226908	9.9217e-09	<0.001	GO:0006725	cellular aromatic compound metabolic process
230	1004	0.223842	5.88868e-08	<0.001	GO:0043234	protein complex
285	1292	0.222536	2.12032e-08	<0.001	GO:0032991	macromolecular complex
282	1283	0.217581	4.32207e-08	<0.001	GO:0097159	organic cyclic compound binding
338	1598	0.217343	3.99546e-08	<0.001	GO:0050789	regulation of biological process
115	474	0.216149	3.10522e-05	0.032	GO:0032559	adenyl ribonucleotide binding
280	1275	0.21566	5.73239e-08	<0.001	GO:1901363	heterocyclic compound binding
116	480	0.213917	3.44725e-05	0.039	GO:0010033	response to organic substance
115	477	0.211985	4.22587e-05	0.041	GO:0030554	adenyl nucleotide binding
421	2126	0.210327	7.97455e-07	0.001	GO:0044699	single-organism process
194	845	0.208711	1.20141e-06	0.001	GO:0044707	single-multicellular organism process
199	875	0.203826	1.6979e-06	0.001	GO:0032501	multicellular organismal process
142	611	0.196962	3.26283e-05	0.034	GO:0044767	single-organism developmental process
168	745	0.185335	3.07764e-05	0.031	GO:0031981	nuclear lumen
315	1528	0.176704	6.12406e-06	0.005	GO:0050794	regulation of cellular process
231	1076	0.17264	1.98424e-05	0.018	GO:0090304	nucleic acid metabolic process
226	1055	0.168877	3.16677e-05	0.032	GO:0051716	cellular response to stimulus
332	1646	0.163909	2.65763e-05	0.021	GO:0044260	cellular macromolecule metabolic process

## Sheet: Cluster7
# species: Homo sapiens
# support: EXP, IMP, ISS, ISM, TAS, IEA, IBA, IRD, IDA, IGI, ISO, IGC, NAS, IBD, IPI, IEP, ISA, RCA, IC, IKR
# associations retrieved on: 2014-07-24 13:54:35-04
# gofunc built on: 2013-10-27 21:51:15.890197-04
# gene associations file: ftp://ftp.geneontology.org/pub/go/gene-associations/gene_association.goa_human.gz
# revision: 0
# downloaded on: 2013-10-27 16:13:44-04
# GO DAG files from: http://archive.geneontology.org/latest-full/go_201310-assocdb-tables.tar.gz
# downloaded on: 2013-10-17 16:47:31-04
# translation required: yes
# translation info:
# authority: ensembl
# synergizer db built on: 2012-02-05 16:36:50.758813-05
# synergizer db built from: Ensembl Genes 65 / Ensembl Metazoa Genes 12 / Ensembl Plants Genes 10
# namespace: ensembl_gene_id
# coverage: 99.6%
# size of "genespace": 3279
# number of attributes: 10471
# NOTE: these associations have been restricted to the genes included
# in the user-supplied gene space.
# NOTE: the last record consists of all the entities in the
# "genespace" that are not associated with any attribute (for
# the requested support).
# Original number of entities in query: 454
# Number of entities in query: 454
# Total number of entities: 3279
# Total number of attributes: 10471
# Original total number of attributes: 17521
# Translation required: yes
# Translation coverage: 0.995851
# Mode: unordered
# Number of simulations: 1000
# Adjusted P-value cutoff: 0.05
# Over/under: over
# Evidence codes: EXP, IMP, ISS, ISM, TAS, IEA, IBA, IRD, IDA, IGI, ISO, IGC, NAS, IBD, IPI, IEP, ISA, RCA, IC, IKR
OVERREPRESENTED ATTRIBUTES
N	X	LOD	P	P_adj	attrib ID	attrib name
7	9	1.27712	2.61424e-05	0.023	GO:0031080	nuclear pore outer ring
25	70	0.559689	2.7447e-06	0.001	GO:0016072	rRNA metabolic process
24	68	0.551112	5.54492e-06	0.001	GO:0006364	rRNA processing
29	90	0.493664	4.82551e-06	0.001	GO:0042254	ribosome biogenesis

## Sheet: Cluster8
# species: Homo sapiens
# support: EXP, IMP, ISS, ISM, TAS, IEA, IBA, IRD, IDA, IGI, ISO, IGC, NAS, IBD, IPI, IEP, ISA, RCA, IC, IKR
# associations retrieved on: 2014-07-24 13:56:44-04
# gofunc built on: 2013-10-27 21:51:15.890197-04
# gene associations file: ftp://ftp.geneontology.org/pub/go/gene-associations/gene_association.goa_human.gz
# revision: 0
# downloaded on: 2013-10-27 16:13:44-04
# GO DAG files from: http://archive.geneontology.org/latest-full/go_201310-assocdb-tables.tar.gz
# downloaded on: 2013-10-17 16:47:31-04
# translation required: yes
# translation info:
# authority: ensembl
# synergizer db built on: 2012-02-05 16:36:50.758813-05
# synergizer db built from: Ensembl Genes 65 / Ensembl Metazoa Genes 12 / Ensembl Plants Genes 10
# namespace: ensembl_gene_id
# coverage: 99.6%
# size of "genespace": 3279
# number of attributes: 10471
# NOTE: these associations have been restricted to the genes included
# in the user-supplied gene space.
# NOTE: the last record consists of all the entities in the
# "genespace" that are not associated with any attribute (for
# the requested support).
# Original number of entities in query: 415
# Number of entities in query: 415
# Total number of entities: 3279
# Total number of attributes: 10471
# Original total number of attributes: 17521
# Translation required: yes
# Translation coverage: 0.995851
# Mode: unordered
# Number of simulations: 1000
# Adjusted P-value cutoff: 0.05
# Over/under: over
# Evidence codes: EXP, IMP, ISS, ISM, TAS, IEA, IBA, IRD, IDA, IGI, ISO, IGC, NAS, IBD, IPI, IEP, ISA, RCA, IC, IKR
OVERREPRESENTED ATTRIBUTES
N	X	LOD	P	P_adj	attrib ID	attrib name
29	30	2.16348	1.02337e-25	<0.001	GO:0022625	cytosolic large ribosomal subunit
46	49	2.01236	6.75763e-39	<0.001	GO:0022626	cytosolic ribosome
17	18	1.92342	6.53297e-15	<0.001	GO:0022627	cytosolic small ribosomal subunit
46	51	1.81577	6.7964e-37	<0.001	GO:0006415	translational termination
51	58	1.73103	1.30866e-39	<0.001	GO:0006414	translational elongation
11	13	1.51258	7.28066e-09	<0.001	GO:0001731	formation of translation preinitiation complex
10	12	1.472	4.9802e-08	<0.001	GO:0033290	eukaryotic 48S preinitiation complex
50	64	1.43396	8.06707e-34	<0.001	GO:0006614	SRP-dependent cotranslational protein targeting to membrane
50	65	1.40484	3.10692e-33	<0.001	GO:0006613	cotranslational protein targeting to membrane
50	67	1.35183	3.98954e-32	<0.001	GO:0045047	protein targeting to ER
50	67	1.35183	3.98954e-32	<0.001	GO:0072599	establishment of protein localization to endoplasmic reticulum
10	13	1.32572	1.91428e-07	<0.001	GO:0005852	eukaryotic translation initiation factor 3 complex
10	13	1.32572	1.91428e-07	<0.001	GO:0016282	eukaryotic 43S preinitiation complex
10	13	1.32572	1.91428e-07	<0.001	GO:0070993	translation preinitiation complex
29	39	1.31701	7.22965e-19	<0.001	GO:0015934	large ribosomal subunit
50	69	1.30453	4.32255e-31	<0.001	GO:0043624	cellular protein complex disassembly
64	90	1.29348	5.80729e-39	<0.001	GO:0006413	translational initiation
51	71	1.29236	2.12639e-31	<0.001	GO:0070972	protein localization to endoplasmic reticulum
9	12	1.28119	1.18944e-06	<0.001	GO:0042274	ribosomal small subunit biogenesis
48	69	1.2419	1.53082e-28	<0.001	GO:0000184	nuclear-transcribed mRNA catabolic process, nonsense-mediated decay
53	80	1.18265	8.17082e-30	<0.001	GO:0006612	protein targeting to membrane
49	75	1.16037	3.62349e-27	<0.001	GO:0019083	viral transcription
48	74	1.15033	2.07078e-26	<0.001	GO:0044391	ribosomal subunit
49	77	1.12847	2.21333e-26	<0.001	GO:0019080	viral genome expression
52	82	1.12783	7.32141e-28	<0.001	GO:0043241	protein complex disassembly
53	86	1.09602	1.71273e-27	<0.001	GO:0032984	macromolecular complex disassembly
51	87	1.03937	5.21114e-25	<0.001	GO:0044445	cytosolic part
56	103	0.96952	3.943e-25	<0.001	GO:0090150	establishment of protein localization to membrane
47	88	0.942996	9.80834e-21	<0.001	GO:0003735	structural constituent of ribosome
19	35	0.928924	3.48082e-09	<0.001	GO:0015935	small ribosomal subunit
58	112	0.926267	1.49013e-24	<0.001	GO:0072657	protein localization to membrane
57	112	0.909515	1.23974e-23	<0.001	GO:0006402	mRNA catabolic process
54	106	0.907221	1.95047e-22	<0.001	GO:0000956	nuclear-transcribed mRNA catabolic process
57	118	0.864004	3.63474e-22	<0.001	GO:0019058	viral life cycle
60	126	0.855019	6.66123e-23	<0.001	GO:0006401	RNA catabolic process
53	116	0.813663	3.02921e-19	<0.001	GO:0005840	ribosome
63	151	0.752169	3.22601e-20	<0.001	GO:0022411	cellular component disassembly
15	34	0.751853	5.02692e-06	0.005	GO:0050851	antigen receptor-mediated signaling pathway
407	3005	0.691683	4.75046e-09	<0.001	GO:0005623	cell
407	3005	0.691683	4.75046e-09	<0.001	GO:0044464	cell part
17	42	0.689311	4.92165e-06	0.004	GO:0008135	translation factor activity, nucleic acid binding
96	265	0.681526	2.66168e-25	<0.001	GO:0006412	translation
18	45	0.681438	3.15644e-06	0.002	GO:0030098	lymphocyte differentiation
60	158	0.67941	6.99289e-17	<0.001	GO:0005198	structural molecule activity
15	39	0.651958	3.71242e-05	0.036	GO:0006446	regulation of translational initiation
66	186	0.636851	9.69252e-17	<0.001	GO:0072594	establishment of protein localization to organelle
81	242	0.610515	1.02945e-18	<0.001	GO:0044802	single-organism membrane organization
407	3051	0.601774	8.5964e-07	<0.001	GO:0005575	cellular_component
65	194	0.59632	4.59807e-15	<0.001	GO:0006605	protein targeting
83	256	0.59059	3.41892e-18	<0.001	GO:0061024	membrane organization
23	66	0.589219	2.33445e-06	0.002	GO:0002521	leukocyte differentiation
73	225	0.581727	5.19305e-16	<0.001	GO:0033365	protein localization to organelle
20	59	0.569106	1.7391e-05	0.015	GO:0002429	immune response-activating cell surface receptor signaling pathway
101	342	0.544809	6.95323e-19	<0.001	GO:0030529	ribonucleoprotein complex
399	2906	0.538068	7.04756e-09	<0.001	GO:0008150	biological_process
95	328	0.526092	4.51889e-17	<0.001	GO:0016032	viral process
95	328	0.526092	4.51889e-17	<0.001	GO:0044764	multi-organism cellular process
399	2922	0.51542	3.70167e-08	<0.001	GO:0003674	molecular_function
124	455	0.513768	3.83682e-20	<0.001	GO:0043933	macromolecular complex subunit organization
104	373	0.509321	1.9854e-17	<0.001	GO:0071822	protein complex subunit organization
95	339	0.504281	5.17638e-16	<0.001	GO:0044403	symbiosis, encompassing mutualism through parasitism
95	339	0.504281	5.17638e-16	<0.001	GO:0044419	interspecies interaction between organisms
390	2764	0.500148	1.4795e-10	<0.001	GO:0009987	cellular process
25	84	0.488412	2.0984e-05	0.019	GO:0071826	ribonucleoprotein complex subunit organization
24	81	0.485086	3.33998e-05	0.036	GO:0022618	ribonucleoprotein complex assembly
83	301	0.483115	1.61439e-13	<0.001	GO:0006886	intracellular protein transport
86	319	0.471077	2.20835e-13	<0.001	GO:0034655	nucleobase-containing compound catabolic process
399	2955	0.465642	9.78891e-07	<0.001	GO:0044424	intracellular part
88	332	0.461837	3.19317e-13	<0.001	GO:0016482	cytoplasmic transport
86	327	0.455125	1.03751e-12	<0.001	GO:0046700	heterocycle catabolic process
30	107	0.454189	1.17421e-05	0.011	GO:0006417	regulation of translation
96	372	0.451409	1.21339e-13	<0.001	GO:0016071	mRNA metabolic process
86	329	0.451212	1.51016e-12	<0.001	GO:0044270	cellular nitrogen compound catabolic process
86	331	0.447328	2.18843e-12	<0.001	GO:0019439	aromatic compound catabolic process
399	2967	0.446378	3.0553e-06	0.002	GO:0005622	intracellular
87	336	0.445957	1.94265e-12	<0.001	GO:1901361	organic cyclic compound catabolic process
377	2618	0.435754	9.15439e-11	<0.001	GO:0005488	binding
81	317	0.432638	2.90323e-11	<0.001	GO:0044265	cellular macromolecule catabolic process
42	158	0.428868	9.42669e-07	<0.001	GO:0022613	ribonucleoprotein complex biogenesis
95	381	0.428418	1.6696e-12	<0.001	GO:0034613	cellular protein localization
95	383	0.42506	2.34897e-12	<0.001	GO:0070727	cellular macromolecule localization
105	438	0.411473	1.21722e-12	<0.001	GO:0003723	RNA binding
107	450	0.407886	1.22114e-12	<0.001	GO:0051704	multi-organism process
86	357	0.399277	1.86559e-10	<0.001	GO:0009057	macromolecule catabolic process
116	530	0.361659	4.31441e-11	<0.001	GO:0046907	intracellular transport
107	491	0.351796	4.46356e-10	<0.001	GO:0045184	establishment of protein localization
190	990	0.338202	5.13356e-13	<0.001	GO:0005829	cytosol
47	208	0.33401	2.75009e-05	0.028	GO:0034622	cellular macromolecular complex assembly
180	931	0.33356	1.85898e-12	<0.001	GO:0009059	macromolecule biosynthetic process
102	479	0.333332	5.34369e-09	<0.001	GO:0015031	protein transport
205	1100	0.33185	6.43669e-13	<0.001	GO:0010467	gene expression
118	569	0.328221	1.16609e-09	<0.001	GO:0008104	protein localization
182	952	0.327284	3.96278e-12	<0.001	GO:0044267	cellular protein metabolic process
193	1025	0.326997	2.24332e-12	<0.001	GO:0019538	protein metabolic process
126	617	0.324308	7.1038e-10	<0.001	GO:0051649	establishment of localization in cell
176	919	0.322801	1.07345e-11	<0.001	GO:0034645	cellular macromolecule biosynthetic process
51	231	0.322496	2.41092e-05	0.02	GO:0048584	positive regulation of response to stimulus
281	1734	0.308022	4.11424e-11	<0.001	GO:0043170	macromolecule metabolic process
134	680	0.306861	2.1175e-09	<0.001	GO:0051641	cellular localization
74	354	0.303209	2.47385e-06	0.002	GO:0065003	macromolecular complex assembly
120	603	0.302884	1.2269e-08	<0.001	GO:0032774	RNA biosynthetic process
142	733	0.301598	1.88457e-09	<0.001	GO:0003676	nucleic acid binding
225	1292	0.299553	4.57038e-11	<0.001	GO:0032991	macromolecular complex
353	2471	0.299511	2.01763e-07	<0.001	GO:0005737	cytoplasm
172	931	0.293118	6.49527e-10	<0.001	GO:0043228	non-membrane-bounded organelle
172	931	0.293118	6.49527e-10	<0.001	GO:0043232	intracellular non-membrane-bounded organelle
268	1646	0.29291	1.97804e-10	<0.001	GO:0044260	cellular macromolecule metabolic process
130	672	0.29156	1.52335e-08	<0.001	GO:0044765	single-organism transport
127	655	0.290885	2.11551e-08	<0.001	GO:0033036	macromolecule localization
179	992	0.281947	1.81839e-09	<0.001	GO:0051179	localization
170	940	0.275981	5.72765e-09	<0.001	GO:0016070	RNA metabolic process
93	478	0.270622	2.87928e-06	0.002	GO:0048583	regulation of response to stimulus
131	702	0.268326	1.43055e-07	<0.001	GO:0034654	nucleobase-containing compound biosynthetic process
322	2185	0.26804	1.29307e-07	<0.001	GO:0071704	organic substance metabolic process
331	2281	0.264665	4.20897e-07	<0.001	GO:0008152	metabolic process
316	2131	0.264537	1.15123e-07	<0.001	GO:0044238	primary metabolic process
114	607	0.261254	9.80945e-07	<0.001	GO:0044248	cellular catabolic process
115	616	0.258022	1.19751e-06	0.001	GO:0071702	organic substance transport
120	646	0.257969	8.29356e-07	<0.001	GO:1901575	organic substance catabolic process
214	1275	0.257348	1.39305e-08	<0.001	GO:1901363	heterocyclic compound binding
156	872	0.257296	9.3795e-08	<0.001	GO:0051234	establishment of localization
186	1076	0.255719	3.18859e-08	<0.001	GO:0090304	nucleic acid metabolic process
154	862	0.254866	1.34119e-07	<0.001	GO:0006810	transport
133	730	0.253672	5.05838e-07	<0.001	GO:0018130	heterocycle biosynthetic process
132	724	0.253478	5.48921e-07	<0.001	GO:0019438	aromatic compound biosynthetic process
316	2149	0.252739	4.10001e-07	<0.001	GO:0044237	cellular metabolic process
214	1283	0.252157	2.61837e-08	<0.001	GO:0097159	organic cyclic compound binding
97	519	0.247903	1.08138e-05	0.011	GO:0044085	cellular component biogenesis
196	1159	0.247173	6.49153e-08	<0.001	GO:0044249	cellular biosynthetic process
200	1196	0.241683	1.11616e-07	<0.001	GO:1901576	organic substance biosynthetic process
191	1133	0.240537	1.5492e-07	<0.001	GO:0016043	cellular component organization
299	2009	0.239342	5.96275e-07	<0.001	GO:0044444	cytoplasmic part
132	740	0.238838	2.08815e-06	0.002	GO:0044271	cellular nitrogen compound biosynthetic process
201	1212	0.235874	2.1059e-07	<0.001	GO:0009058	biosynthetic process
122	682	0.234529	5.41789e-06	0.007	GO:0009056	catabolic process
134	759	0.233168	3.09534e-06	0.002	GO:1901362	organic cyclic compound biosynthetic process
108	598	0.232518	1.52572e-05	0.013	GO:0010556	regulation of macromolecule biosynthetic process
217	1339	0.230685	3.07633e-07	<0.001	GO:0006139	nucleobase-containing compound metabolic process
197	1191	0.230469	4.10698e-07	<0.001	GO:0071840	cellular component organization or biogenesis
309	2126	0.223991	4.75621e-06	0.004	GO:0044699	single-organism process
296	2006	0.223928	2.5577e-06	0.002	GO:0005515	protein binding
293	1988	0.218174	4.01195e-06	0.003	GO:0044763	single-organism cellular process
112	637	0.217544	3.65891e-05	0.036	GO:0010468	regulation of gene expression
219	1380	0.214395	1.77246e-06	0.001	GO:0046483	heterocycle metabolic process
148	873	0.214078	8.83381e-06	0.01	GO:0060255	regulation of macromolecule metabolic process
218	1373	0.213983	1.85959e-06	0.001	GO:0006725	cellular aromatic compound metabolic process
224	1439	0.201645	6.42735e-06	0.007	GO:0034641	cellular nitrogen compound metabolic process
221	1416	0.201491	6.56633e-06	0.007	GO:1901360	organic cyclic compound metabolic process
281	1914	0.198071	1.86927e-05	0.016	GO:0044422	organelle part
279	1904	0.193509	2.70495e-05	0.026	GO:0044446	intracellular organelle part
241	1598	0.186639	2.85869e-05	0.029	GO:0050789	regulation of biological process
