# Supplementary material for: Integrative analysis of RNA, translation, and protein levels reveals distinct regulatory variation across humans
Source: Genome Res. 2015 Nov;25(11):1610–21. doi: 10.1101/gr.193342.115 (PMC4617958; doi:10.1101/gr.193342.115)
Supplement: Supplemental Material [file supp_gr.193342.115_TableS2.xlsx]

## Sheet: Joint
# species: Homo sapiens
# CC-Modified on Jun 5 2014
# Removed caegories with LOD < 0.478 ~ 3-fold
# support: EXP, IMP, ISS, ISM, TAS, IEA, IBA, IRD, IDA, IGI, ISO, IGC, NAS, IBD, IPI, IEP, ISA, RCA, IC, IKR
# associations retrieved on: 2014-05-23 08:56:59-04
# gofunc built on: 2013-10-27 21:51:15.890197-04
# gene associations file: ftp://ftp.geneontology.org/pub/go/gene-associations/gene_association.goa_human.gz
# revision: 0
# downloaded on: 2013-10-27 16:13:44-04
# GO DAG files from: http://archive.geneontology.org/latest-full/go_201310-assocdb-tables.tar.gz
# downloaded on: 2013-10-17 16:47:31-04
# translation required: yes
# translation info:
# authority: ensembl
# synergizer db built on: 2012-02-05 16:36:50.758813-05
# synergizer db built from: Ensembl Genes 65 / Ensembl Metazoa Genes 12 / Ensembl Plants Genes 10
# namespace: ensembl_gene_id
# coverage: 99.6%
# size of "genespace": 9651
# number of attributes: 14476
# NOTE: these associations have been restricted to the genes included
# in the user-supplied gene space.
# NOTE: the last record consists of all the entities in the
# "genespace" that are not associated with any attribute (for
# the requested support).
# Original number of entities in query: 627
# Number of entities in query: 627
# Total number of entities: 9651
# Total number of attributes: 14476
# Original total number of attributes: 17521
# Translation required: yes
# Translation coverage: 0.995851
# Mode: unordered
# Number of simulations: 1000
# Adjusted P-value cutoff: 0.05
# Over/under: over
# Evidence codes: EXP, IMP, ISS, ISM, TAS, IEA, IBA, IRD, IDA, IGI, ISO, IGC, NAS, IBD, IPI, IEP, ISA, RCA, IC, IKR
OVERREPRESENTED ATTRIBUTES
N	X	LOD	P	P_adj	attrib ID	attrib name
4	4	2.11483	1.76558e-05	0.031	GO:0051410	detoxification of nitrogen compound
7	9	1.63971	1.51773e-07	0.001	GO:0001637	G-protein coupled chemoattractant receptor activity
7	9	1.63971	1.51773e-07	0.001	GO:0004950	chemokine receptor activity
5	7	1.50361	2.14373e-05	0.039	GO:0002675	positive regulation of acute inflammatory response
5	7	1.50361	2.14373e-05	0.039	GO:0043616	keratinocyte proliferation
9	14	1.4012	2.90675e-08	<0.001	GO:0004714	transmembrane receptor protein tyrosine kinase activity
6	10	1.32149	1.22962e-05	0.021	GO:0005201	extracellular matrix structural constituent
9	16	1.26641	1.47538e-07	0.001	GO:0006958	complement activation, classical pathway
6	11	1.23429	2.55899e-05	0.042	GO:0004364	glutathione transferase activity
6	11	1.23429	2.55899e-05	0.042	GO:0015026	coreceptor activity
7	13	1.22454	5.74357e-06	0.007	GO:0035272	exocrine system development
8	15	1.2174	1.29907e-06	0.003	GO:0007416	synapse assembly
10	19	1.20782	6.75007e-08	0.001	GO:0006956	complement activation
10	19	1.20782	6.75007e-08	0.001	GO:0019199	transmembrane receptor protein kinase activity
7	14	1.16234	1.08439e-05	0.018	GO:0007631	feeding behavior
11	23	1.1287	5.25762e-08	0.001	GO:0002455	humoral immune response mediated by circulating immunoglobulin
8	17	1.11464	4.36587e-06	0.006	GO:0004867	serine-type endopeptidase inhibitor activity
8	17	1.11464	4.36587e-06	0.006	GO:0007528	neuromuscular junction development
7	15	1.10794	1.91947e-05	0.032	GO:0050803	regulation of synapse structure and activity
10	22	1.08849	3.95005e-07	0.002	GO:0072376	protein activation cascade
9	20	1.08058	1.70956e-06	0.004	GO:0001653	peptide receptor activity
9	20	1.08058	1.70956e-06	0.004	GO:0008528	G-protein coupled peptide receptor activity
10	23	1.05502	6.58367e-07	0.002	GO:0014068	positive regulation of phosphatidylinositol 3-kinase cascade
12	28	1.04485	5.90872e-08	0.001	GO:0044420	extracellular matrix part
9	21	1.04432	2.81998e-06	0.005	GO:0005604	basement membrane
9	22	1.01085	4.49842e-06	0.006	GO:0031032	actomyosin structure organization
20	51	0.983826	1.53555e-11	<0.001	GO:0005578	proteinaceous extracellular matrix
8	21	0.961841	2.89319e-05	0.048	GO:0005913	cell-cell adherens junction
11	29	0.958149	9.38566e-07	0.002	GO:0004896	cytokine receptor activity
15	40	0.950904	1.15126e-08	<0.001	GO:0050808	synapse organization
12	32	0.950388	3.44578e-07	0.001	GO:0003823	antigen binding
18	49	0.937816	5.76484e-10	<0.001	GO:0006959	humoral immune response
9	25	0.923552	1.54871e-05	0.025	GO:0019955	cytokine binding
20	57	0.907815	1.65447e-10	<0.001	GO:0031012	extracellular matrix
12	35	0.890929	1.06268e-06	0.002	GO:0070374	positive regulation of ERK1 and ERK2 cascade
12	38	0.838606	2.87782e-06	0.005	GO:0050707	regulation of cytokine secretion
25	80	0.835058	1.58273e-11	<0.001	GO:0009897	external side of plasma membrane
16	51	0.834595	7.03543e-08	0.001	GO:0043296	apical junction complex
10	32	0.832733	2.17436e-05	0.039	GO:0019838	growth factor binding
17	55	0.825482	3.51157e-08	<0.001	GO:0030595	leukocyte chemotaxis
11	36	0.818443	1.07177e-05	0.017	GO:0005178	integrin binding
10	33	0.813799	2.94002e-05	0.049	GO:0014066	regulation of phosphatidylinositol 3-kinase cascade
21	70	0.808061	1.57768e-09	<0.001	GO:0060326	cell chemotaxis
13	44	0.79743	2.57981e-06	0.005	GO:0050663	cytokine secretion
26	89	0.793617	3.42328e-11	<0.001	GO:0030198	extracellular matrix organization
26	89	0.793617	3.42328e-11	<0.001	GO:0043062	extracellular structure organization
12	41	0.791885	7.00852e-06	0.011	GO:0022612	gland morphogenesis
13	45	0.783809	3.41489e-06	0.005	GO:0034332	adherens junction organization
12	42	0.777359	9.23909e-06	0.015	GO:0005923	tight junction
12	42	0.777359	9.23909e-06	0.015	GO:0070160	occluding junction
16	56	0.777126	3.0073e-07	0.001	GO:0004930	G-protein coupled receptor activity
15	53	0.771355	8.08809e-07	0.002	GO:0070372	regulation of ERK1 and ERK2 cascade
32	115	0.766726	7.86907e-13	<0.001	GO:0005911	cell-cell junction
43	156	0.76666	1.18445e-16	<0.001	GO:0004888	transmembrane signaling receptor activity
13	47	0.757777	5.83063e-06	0.007	GO:0009581	detection of external stimulus
13	47	0.757777	5.83063e-06	0.007	GO:1901681	sulfur compound binding
23	84	0.753274	1.93648e-09	<0.001	GO:0045216	cell-cell junction organization
12	44	0.749679	1.56248e-05	0.025	GO:0006937	regulation of muscle contraction
15	55	0.749264	1.36363e-06	0.003	GO:0090257	regulation of muscle system process
16	59	0.745947	6.59657e-07	0.002	GO:0016323	basolateral plasma membrane
13	49	0.733206	9.64461e-06	0.017	GO:0045667	regulation of osteoblast differentiation
19	72	0.730285	9.54629e-08	0.001	GO:0001763	morphogenesis of a branching structure
15	58	0.718085	2.84011e-06	0.005	GO:0016064	immunoglobulin mediated immune response
18	70	0.714952	3.18163e-07	0.001	GO:0061138	morphogenesis of a branching epithelium
50	200	0.712347	3.13594e-17	<0.001	GO:0038023	signaling receptor activity
15	59	0.708166	3.58341e-06	0.006	GO:0019724	B cell mediated immunity
18	72	0.698618	5.0262e-07	0.002	GO:0055002	striated muscle cell development
15	61	0.688976	5.60984e-06	0.006	GO:0070371	ERK1 and ERK2 cascade
13	53	0.687851	2.42869e-05	0.04	GO:0060333	interferon-gamma-mediated signaling pathway
22	90	0.686516	4.23098e-08	<0.001	GO:0034329	cell junction assembly
60	257	0.67806	6.739e-19	<0.001	GO:0044421	extracellular region part
13	54	0.677209	3.01163e-05	0.049	GO:0048747	muscle fiber development
17	71	0.673773	1.99936e-06	0.005	GO:0030674	protein binding, bridging
24	101	0.670889	1.86517e-08	<0.001	GO:0034330	cell junction organization
41	175	0.669984	2.61541e-13	<0.001	GO:0005615	extracellular space
23	97	0.669363	3.85862e-08	<0.001	GO:0045177	apical part of cell
14	59	0.668794	1.78596e-05	0.031	GO:0050866	negative regulation of cell activation
15	64	0.661679	1.05704e-05	0.017	GO:0019932	second-messenger-mediated signaling
15	64	0.661679	1.05704e-05	0.017	GO:0071346	cellular response to interferon-gamma
18	77	0.660256	1.45946e-06	0.003	GO:0055001	muscle cell development
18	77	0.660256	1.45946e-06	0.003	GO:0060090	binding, bridging
21	90	0.659713	2.02395e-07	0.001	GO:0018108	peptidyl-tyrosine phosphorylation
42	183	0.65869	2.80689e-13	<0.001	GO:0009986	cell surface
18	78	0.652969	1.78441e-06	0.004	GO:0004713	protein tyrosine kinase activity
17	74	0.650356	3.6866e-06	0.006	GO:0005516	calmodulin binding
14	61	0.650015	2.67864e-05	0.043	GO:0016324	apical plasma membrane
16	70	0.647508	7.61812e-06	0.013	GO:0007160	cell-matrix adhesion
21	92	0.647294	3.01366e-07	0.001	GO:0018212	peptidyl-tyrosine modification
99	468	0.644456	2.92049e-27	<0.001	GO:0005576	extracellular region
15	68	0.627737	2.30542e-05	0.039	GO:0009743	response to carbohydrate stimulus
34	156	0.625774	2.4487e-10	<0.001	GO:0044057	regulation of system process
24	110	0.622737	1.07933e-07	0.001	GO:0016337	cell-cell adhesion
15	69	0.619646	2.77225e-05	0.048	GO:0051480	cytosolic calcium ion homeostasis
61	291	0.617215	9.13068e-17	<0.001	GO:0004872	receptor activity
26	121	0.614834	4.43332e-08	0.001	GO:0008015	blood circulation
26	122	0.610261	5.29559e-08	0.001	GO:0003013	circulatory system process
32	151	0.609292	1.76035e-09	<0.001	GO:0002429	immune response-activating cell surface receptor signaling pathway
26	124	0.601255	7.50654e-08	0.001	GO:0050900	leukocyte migration
20	97	0.590608	3.16389e-06	0.005	GO:0031589	cell-substrate adhesion
22	107	0.589415	1.07669e-06	0.002	GO:0030335	positive regulation of cell migration
121	647	0.587941	3.80638e-28	<0.001	GO:0044459	plasma membrane part
34	168	0.584602	1.94839e-09	<0.001	GO:0007186	G-protein coupled receptor signaling pathway
22	110	0.574293	1.75983e-06	0.004	GO:2000147	positive regulation of cell motility
21	106	0.568955	3.5393e-06	0.006	GO:0070161	anchoring junction
19	96	0.568174	1.04192e-05	0.017	GO:0050851	antigen receptor-mediated signaling pathway
19	96	0.568174	1.04192e-05	0.017	GO:0072001	renal system development
22	112	0.56449	2.41443e-06	0.005	GO:0040017	positive regulation of locomotion
20	102	0.563213	7.10235e-06	0.011	GO:0005912	adherens junction
32	165	0.560495	1.74001e-08	<0.001	GO:0045202	synapse
21	108	0.558816	4.83316e-06	0.006	GO:0055074	calcium ion homeostasis
62	329	0.558504	1.02437e-14	<0.001	GO:0007155	cell adhesion
62	330	0.556834	1.18659e-14	<0.001	GO:0022610	biological adhesion
39	204	0.555462	7.18378e-10	<0.001	GO:0050865	regulation of cell activation
20	104	0.552713	9.65036e-06	0.017	GO:0006874	cellular calcium ion homeostasis
23	120	0.551397	2.22858e-06	0.005	GO:0007600	sensory perception
22	115	0.550181	3.81819e-06	0.006	GO:0051272	positive regulation of cellular component movement
30	158	0.548278	8.03891e-08	0.001	GO:0002009	morphogenesis of an epithelium
69	378	0.544593	1.54155e-15	<0.001	GO:0016477	cell migration
21	111	0.544029	7.58697e-06	0.013	GO:0001655	urogenital system development
53	287	0.542934	2.29178e-12	<0.001	GO:0030054	cell junction
27	144	0.540538	4.67458e-07	0.002	GO:0043410	positive regulation of MAPK cascade
36	195	0.535281	8.72027e-09	<0.001	GO:0002694	regulation of leukocyte activation
23	124	0.533741	4.00039e-06	0.006	GO:0051146	striated muscle cell differentiation
41	225	0.530261	1.18488e-09	<0.001	GO:0002768	immune response-regulating cell surface receptor signaling pathway
42	231	0.529484	7.931e-10	<0.001	GO:0051050	positive regulation of transport
64	359	0.529098	5.66364e-14	<0.001	GO:0031226	intrinsic to plasma membrane
45	249	0.527515	2.36812e-10	<0.001	GO:0006935	chemotaxis
45	249	0.527515	2.36812e-10	<0.001	GO:0042330	taxis
33	181	0.527408	5.03104e-08	0.001	GO:0030334	regulation of cell migration
31	170	0.526808	1.27922e-07	0.001	GO:0032101	regulation of response to external stimulus
62	349	0.526197	1.70417e-13	<0.001	GO:0005887	integral to plasma membrane
23	126	0.525169	5.30094e-06	0.006	GO:0002250	adaptive immune response
73	416	0.525054	1.92153e-15	<0.001	GO:0048870	cell motility
73	416	0.525054	1.92153e-15	<0.001	GO:0051674	localization of cell
21	115	0.525052	1.34478e-05	0.022	GO:0072507	divalent inorganic cation homeostasis
38	211	0.522694	6.83445e-09	<0.001	GO:0005509	calcium ion binding
32	177	0.522527	9.8642e-08	0.001	GO:0051046	regulation of secretion
54	304	0.522278	6.93673e-12	<0.001	GO:0050778	positive regulation of immune response
23	127	0.520944	6.08597e-06	0.007	GO:0002443	leukocyte mediated immunity
34	189	0.520567	4.44313e-08	0.001	GO:0048729	tissue morphogenesis
47	264	0.520285	1.58071e-10	<0.001	GO:0002253	activation of immune response
40	224	0.518928	3.50333e-09	<0.001	GO:0051270	regulation of cellular component movement
20	111	0.517808	2.63459e-05	0.043	GO:0072503	cellular divalent inorganic cation homeostasis
44	248	0.517119	6.969e-10	<0.001	GO:0002757	immune response-activating signal transduction
117	712	0.512962	3.99287e-22	<0.001	GO:0006955	immune response
68	396	0.5107	5.81255e-14	<0.001	GO:0002684	positive regulation of immune system process
30	170	0.508919	4.28506e-07	0.002	GO:0031252	cell leading edge
31	177	0.505202	3.27303e-07	0.001	GO:0051249	regulation of lymphocyte activation
222	1544	0.504575	4.14793e-35	<0.001	GO:0071944	cell periphery
35	201	0.503486	6.57515e-08	0.001	GO:2000145	regulation of cell motility
216	1495	0.503097	2.66672e-34	<0.001	GO:0005886	plasma membrane
74	441	0.501174	1.41244e-14	<0.001	GO:0050776	regulation of immune response
36	210	0.49551	6.4364e-08	0.001	GO:0040012	regulation of locomotion
89	545	0.494101	1.20183e-16	<0.001	GO:0003008	system process
52	310	0.49048	1.56839e-10	<0.001	GO:0002764	immune response-regulating signaling pathway
46	273	0.490281	1.61915e-09	<0.001	GO:0022603	regulation of anatomical structure morphogenesis
64	387	0.488386	1.97928e-12	<0.001	GO:0004871	signal transducer activity
64	387	0.488386	1.97928e-12	<0.001	GO:0060089	molecular transducer activity
59	356	0.487189	1.40974e-11	<0.001	GO:0046903	secretion
99	620	0.487121	8.61568e-18	<0.001	GO:0002682	regulation of immune system process
35	208	0.485257	1.57913e-07	0.001	GO:0001944	vasculature development
22	130	0.484833	2.92717e-05	0.048	GO:0030155	regulation of cell adhesion
28	166	0.484337	2.63545e-06	0.005	GO:0042692	muscle cell differentiation
88	549	0.483431	5.94197e-16	<0.001	GO:0040011	locomotion
23	137	0.480768	2.21403e-05	0.039	GO:0050867	positive regulation of cell activation
52	316	0.480217	3.21532e-10	<0.001	GO:0032940	secretion by cell

## Sheet: RibosomeOccupancy
# species: Homo sapiens
# support: EXP, IMP, ISS, ISM, TAS, IEA, IBA, IRD, IDA, IGI, ISO, IGC, NAS, IBD, IPI, IEP, ISA, RCA, IC, IKR
# associations retrieved on: 2014-05-23 08:42:48-04
# gofunc built on: 2013-10-27 21:51:15.890197-04
# gene associations file: ftp://ftp.geneontology.org/pub/go/gene-associations/gene_association.goa_human.gz
# revision: 0
# downloaded on: 2013-10-27 16:13:44-04
# GO DAG files from: http://archive.geneontology.org/latest-full/go_201310-assocdb-tables.tar.gz
# downloaded on: 2013-10-17 16:47:31-04
# translation required: yes
# translation info:
# authority: ensembl
# synergizer db built on: 2012-02-05 16:36:50.758813-05
# synergizer db built from: Ensembl Genes 65 / Ensembl Metazoa Genes 12 / Ensembl Plants Genes 10
# namespace: ensembl_gene_id
# coverage: 99.6%
# size of "genespace": 9651
# number of attributes: 14476
# NOTE: these associations have been restricted to the genes included
# in the user-supplied gene space.
# NOTE: the last record consists of all the entities in the
# "genespace" that are not associated with any attribute (for
# the requested support).
# Original number of entities in query: 72
# Number of entities in query: 72
# Total number of entities: 9651
# Total number of attributes: 14476
# Original total number of attributes: 17521
# Translation required: yes
# Translation coverage: 0.995851
# Mode: ordered
# Number of simulations: 1000
# Adjusted P-value cutoff: 0.05
# Over/under: over
# Evidence codes: EXP, IMP, ISS, ISM, TAS, IEA, IBA, IRD, IDA, IGI, ISO, IGC, NAS, IBD, IPI, IEP, ISA, RCA, IC, IKR
OVERREPRESENTED ATTRIBUTES
N	M	X	LOD	P	P_adj	attrib ID	attrib name
2	10	3	3.27653	2.8975e-06	0.049	GO:0032252	secretory granule localization
3	10	23	2.3405	1.40357e-06	0.024	GO:0045576	mast cell activation
8	13	712	1.29225	7.78912e-07	0.012	GO:0006955	immune response
18	65	716	0.69514	6.75534e-07	0.009	GO:0005794	Golgi apparatus
23	71	1059	0.601443	9.91136e-07	0.017	GO:0070887	cellular response to chemical stimulus

## Sheet: RNAExpression
# species: Homo sapiens
# support: EXP, IMP, ISS, ISM, TAS, IEA, IBA, IRD, IDA, IGI, ISO, IGC, NAS, IBD, IPI, IEP, ISA, RCA, IC, IKR
# associations retrieved on: 2014-05-23 08:44:16-04
# gofunc built on: 2013-10-27 21:51:15.890197-04
# gene associations file: ftp://ftp.geneontology.org/pub/go/gene-associations/gene_association.goa_human.gz
# revision: 0
# downloaded on: 2013-10-27 16:13:44-04
# GO DAG files from: http://archive.geneontology.org/latest-full/go_201310-assocdb-tables.tar.gz
# downloaded on: 2013-10-17 16:47:31-04
# translation required: yes
# translation info:
# authority: ensembl
# synergizer db built on: 2012-02-05 16:36:50.758813-05
# synergizer db built from: Ensembl Genes 65 / Ensembl Metazoa Genes 12 / Ensembl Plants Genes 10
# namespace: ensembl_gene_id
# coverage: 99.6%
# size of "genespace": 9651
# number of attributes: 14476
# NOTE: these associations have been restricted to the genes included
# in the user-supplied gene space.
# NOTE: the last record consists of all the entities in the
# "genespace" that are not associated with any attribute (for
# the requested support).
# Original number of entities in query: 1954
# Number of entities in query: 1954
# Total number of entities: 9651
# Total number of attributes: 14476
# Original total number of attributes: 17521
# Translation required: yes
# Translation coverage: 0.995851
# Mode: ordered
# Number of simulations: 1000
# Adjusted P-value cutoff: 0.05
# Over/under: over
# Evidence codes: EXP, IMP, ISS, ISM, TAS, IEA, IBA, IRD, IDA, IGI, ISO, IGC, NAS, IBD, IPI, IEP, ISA, RCA, IC, IKR
OVERREPRESENTED ATTRIBUTES
N	M	X	LOD	P	P_adj	attrib ID	attrib name
21	648	84	0.683413	9.92113e-08	0.007	GO:0001726	ruffle
34	648	170	0.561966	6.26155e-09	0	GO:0031252	cell leading edge
63	1180	200	0.537103	2.98963e-13	0	GO:0003779	actin binding
48	544	329	0.486133	8.57231e-10	0	GO:0007155	cell adhesion
48	544	330	0.484543	9.51375e-10	0	GO:0022610	biological adhesion
56	652	382	0.400749	2.22547e-08	0.004	GO:0008092	cytoskeletal protein binding
91	1722	264	0.3992	3.96124e-11	0	GO:0005543	phospholipid binding
57	1852	156	0.394178	2.41378e-07	0.014	GO:0004888	transmembrane signaling receptor activity
71	1852	200	0.376074	3.23281e-08	0.004	GO:0038023	signaling receptor activity
80	1095	359	0.370633	1.24386e-09	0	GO:0031226	intrinsic to plasma membrane
70	717	468	0.367801	8.4024e-09	0.001	GO:0005576	extracellular region
76	1095	349	0.356531	9.62318e-09	0.001	GO:0005887	integral to plasma membrane
97	1794	291	0.354702	7.95933e-10	0	GO:0004872	receptor activity
115	1722	363	0.346551	5.09025e-11	0	GO:0008289	lipid binding
70	1661	233	0.326488	7.4322e-07	0.042	GO:0060284	regulation of cell development
73	671	577	0.314579	2.81101e-07	0.017	GO:0009605	response to external stimulus
124	1852	387	0.313889	5.39498e-10	0	GO:0004871	signal transducer activity
124	1852	387	0.313889	5.39498e-10	0	GO:0060089	molecular transducer activity
95	1742	311	0.313844	3.60891e-08	0.004	GO:0042060	wound healing
74	672	597	0.303366	5.53354e-07	0.034	GO:0016192	vesicle-mediated transport
151	1742	510	0.300883	3.84868e-11	0	GO:0009611	response to wounding
106	1020	582	0.299554	7.21002e-09	0	GO:0042995	cell projection
90	1857	287	0.294393	4.45213e-07	0.025	GO:0030054	cell junction
159	1744	549	0.287047	8.10153e-11	0	GO:0040011	locomotion
123	1792	416	0.280367	1.75933e-08	0.001	GO:0048870	cell motility
123	1792	416	0.280367	1.75933e-08	0.001	GO:0051674	localization of cell
106	1700	378	0.274692	2.08611e-07	0.013	GO:0016477	cell migration
436	1867	1544	0.264006	1.07048e-20	0	GO:0071944	cell periphery
181	1755	647	0.2639	1.50439e-10	0	GO:0044459	plasma membrane part
407	1792	1495	0.262378	1.59884e-19	0	GO:0005886	plasma membrane
119	1689	438	0.260151	1.67877e-07	0.012	GO:0001775	cell activation
133	1857	456	0.252352	1.07052e-07	0.007	GO:0000902	cell morphogenesis
128	1756	465	0.247277	2.48154e-07	0.015	GO:0030030	cell projection organization
180	1792	654	0.241121	3.87433e-09	0	GO:0006928	cellular component movement
137	1857	481	0.237644	3.16154e-07	0.017	GO:0032989	cellular component morphogenesis
167	1693	651	0.228606	4.83238e-08	0.005	GO:0006629	lipid metabolic process
161	681	1568	0.222026	1.43416e-07	0.011	GO:0044765	single-organism transport
180	527	2362	0.218084	1.78712e-07	0.012	GO:0051179	localization
815	1785	3478	0.215271	1.212e-20	0	GO:0016020	membrane
181	1683	746	0.199067	5.5397e-07	0.034	GO:0007399	nervous system development
476	1776	1962	0.197255	1.67933e-13	0	GO:0031224	intrinsic to membrane
471	1776	1946	0.19498	3.71522e-13	0	GO:0016021	integral to membrane
279	1700	1178	0.187977	1.01705e-08	0.001	GO:0007166	cell surface receptor signaling pathway
565	1776	2402	0.185811	1.53672e-13	0	GO:0044425	membrane part
298	1939	1133	0.175188	4.14588e-08	0.004	GO:0023051	regulation of signaling
340	1664	1517	0.172283	9.84713e-09	0.001	GO:0048731	system development
296	1939	1136	0.168832	1.23038e-07	0.008	GO:0010646	regulation of cell communication
577	1885	2373	0.166362	1.80281e-11	0	GO:0044707	single-multicellular organism process
358	1937	1397	0.163629	2.73349e-08	0.004	GO:0048583	regulation of response to stimulus
602	1948	2413	0.163012	2.18408e-11	0	GO:0007154	cell communication
391	1664	1792	0.159794	1.6904e-08	0.001	GO:0007275	multicellular organismal development
589	1885	2457	0.15696	1.50573e-10	0	GO:0032501	multicellular organismal process
582	1948	2351	0.15522	2.54641e-10	0	GO:0023052	signaling
582	1948	2351	0.15522	2.54641e-10	0	GO:0044700	single organism signaling
480	1700	2198	0.154738	3.92608e-09	0	GO:0007165	signal transduction
805	1919	3451	0.142733	2.11999e-10	0	GO:0050896	response to stimulus
392	1664	1848	0.140884	4.98356e-07	0.028	GO:0048856	anatomical structure development
436	1664	2095	0.131933	9.04013e-07	0.049	GO:0032502	developmental process
1078	1690	5653	0.115027	8.39333e-07	0.044	GO:0044699	single-organism process
