# Supplementary material for: Integrative analysis of RNA, translation, and protein levels reveals distinct regulatory variation across humans
Source: Genome Res. 2015 Nov;25(11):1610–21. doi: 10.1101/gr.193342.115 (PMC4617958; doi:10.1101/gr.193342.115)
Supplement: Supplemental Material [file supp_gr.193342.115_TableS3.xlsx]

## Sheet: TableS3.xls
AKAP13-001
AKIP1-010
ALDH2-001
ALG13-011
ANXA2-002
ATF6-001
B3GNT2-001
BCL2L1-004
BHLHE40-001
CAPG-002
CSF2RB-001
CTH-001
ENC1-001
ESD-001
FAM46C-001
FDX1-001
FTL-001
GALNT6-201
GGA2-001
GLA-001
GSTO1-001
HERPUD1-001
HLA-DQA2-001
HLA-G-201
HMSD-001
IER3-001
IFI44L-001
KDM2B-005
LAX1-002
LCP2-001
LGALS9-001
LMAN2-001
LYSMD1-001
MACF1-031
MAPK8IP3-001
MPEG1-001
MXD4-001
NCF2-002
NEDD4L-001
NMI-001
NRBP1-002
OFD1-001
OSR2-201
PARM1-001
PGM3-001
PIK3CG-001
PLA2G6-001
PLAC8-006
RAB39A-001
RAB8A-001
RASGRP1-001
RIPK2-001
S100A4-001
SACM1L-001
SDC4-001
SELL-001
SNX19-001
TFB1M-001
TMEM106B-002
TNFAIP3-001
TNFSF4-001
TPRG1-001
TRAF7-001
TRAM2-001
TRIB1-001
TTF2-001
UBE2J1-001
WARS-001
WFS1-001
XAF1-001
XBP1-001
ZNF318-001
