# Supplementary material for: Integrative analysis of RNA, translation, and protein levels reveals distinct regulatory variation across humans
Source: Genome Res. 2015 Nov;25(11):1610–21. doi: 10.1101/gr.193342.115 (PMC4617958; doi:10.1101/gr.193342.115)
Supplement: Supplemental Material [file supp_gr.193342.115_TableS4.xlsx]

## Sheet: roQTLs
SNP	ENST	ENST_POS	BETA	P	EMP2	REF	ALT
ENST00000058691.2;322;G;A	ENST00000058691.2	322	-1.514	0.00247	0.0018	G	A
ENST00000216392.7;207;T;C	ENST00000216392.7	207	-1.749	9.28e-05	0.0001	T	C
ENST00000217026.4;1406;A;G	ENST00000217026.4	1406	0.3884	0.0007254	0.0006999	A	G
ENST00000222823.4;682;G;C	ENST00000222823.4	682	0.5692	0.0001652	0.0016	G	C
ENST00000225573.4;1795;A;G	ENST00000225573.4	1795	0.267	0.0006479	0.0008999	A	G
ENST00000227135.2;110;T;G	ENST00000227135.2	110	-0.7214	0.0001806	0.0002	T	G
ENST00000241436.4;1099;C;T	ENST00000241436.4	1099	-0.2349	0.0006686	0.0019	C	T
ENST00000243776.6;1452;G;A	ENST00000243776.6	1452	0.7193	0.001461	0.0023	G	A
ENST00000248306.3;567;C;T	ENST00000248306.3	567	-0.4657	0.0006456	0.0018	C	T
ENST00000253861.4;2837;G;A	ENST00000253861.4	2837	-0.3707	0.0004374	0.0015	G	A
ENST00000258739.4;1229;T;C	ENST00000258739.4	1229	-0.5131	0.001324	0.0025	T	C
ENST00000262097.6;2238;G;C	ENST00000262097.6	2238	-0.4198	2.39e-05	0.0004	G	C
ENST00000264205.6;1691;A;G	ENST00000264205.6	1691	-1.134	0.00232	0.0009999	A	G
ENST00000264331.4;459;T;C	ENST00000264331.4	459	-0.3248	2.56e-05	0.0001	T	C
ENST00000264663.5;5026;T;C	ENST00000264663.5	5026	0.3759	0.0011	0.002	T	C
ENST00000264689.6;85;G;A	ENST00000264689.6	85	-0.4069	0.0001519	0.0004	G	A
ENST00000267202.2;2699;C;T	ENST00000267202.2	2699	-0.7817	0.002621	0.0023	C	T
ENST00000269228.5;71;C;T	ENST00000269228.5	71	-0.4869	0.0002196	0.0017	C	T
ENST00000278319.5;400;A;C	ENST00000278319.5	400	0.7556	8.97e-05	0.0007999	A	C
ENST00000278353.4;2194;C;A	ENST00000278353.4	2194	-0.532	0.0002246	0.0006999	C	A
ENST00000300584.3;5918;T;C	ENST00000300584.3	5918	-0.2366	0.0001595	0.0007999	T	C
ENST00000308924.4;1306;C;T	ENST00000308924.4	1306	0.145	0.001363	0.0028	C	T
ENST00000312251.3;1799;G;A	ENST00000312251.3	1799	0.5737	0.0001112	0.0005999	G	A
ENST00000315758.5;120;C;T	ENST00000315758.5	120	-0.271	0.001697	0.0027	C	T
ENST00000317271.2;415;G;T	ENST00000317271.2	415	-0.7441	0.0002758	0.0012	G	T
ENST00000326544.5;895;G;A	ENST00000326544.5	895	-0.6056	0.0004267	0.0011	G	A
ENST00000330133.4;37;C;T	ENST00000330133.4	37	0.3473	0.0006982	0.0012	C	T
ENST00000331615.2;2881;C;T	ENST00000331615.2	2881	-0.7215	4.65e-05	0.0005	C	T
ENST00000335725.4;541;A;G	ENST00000335725.4	541	0.3523	0.0001996	0.0011	A	G
ENST00000340413.2;2591;T;C	ENST00000340413.2	2591	-0.2445	0.0007335	0.0025	T	C
ENST00000355341.4;63;C;T	ENST00000355341.4	63	-0.5188	0.0004685	0.0004	C	T
ENST00000355774.2;5535;G;T	ENST00000355774.2	5535	-0.5368	5.73e-07	0.0001	G	T
ENST00000356488.4;37;A;C	ENST00000356488.4	37	-1.387	0.0005551	0.0015	A	C
ENST00000357318.2;1269;T;C	ENST00000357318.2	1269	0.7312	0.0005734	0.0022	T	C
ENST00000359118.2;731;A;G	ENST00000359118.2	731	-0.5533	0.0002463	0.0007999	A	G
ENST00000360299.5;3205;A;C	ENST00000360299.5	3205	0.3784	0.0008235	0.0012	A	C
ENST00000361790.3;80;G;A	ENST00000361790.3	80	-0.4709	0.0006256	0.0017	G	A
ENST00000366647.4;126;C;T	ENST00000366647.4	126	0.2819	0.0005203	0.0009999	C	T
ENST00000368842.5;8;T;C	ENST00000368842.5	8	0.5478	0.0004337	0.0007999	T	C
ENST00000369238.5;1271;T;G	ENST00000369238.5	1271	0.7254	0.0001971	0.0014	T	G
ENST00000370491.3;828;G;A	ENST00000370491.3	828	-0.3092	0.0003342	0.0014	G	A
ENST00000370608.3;1161;T;C	ENST00000370608.3	1161	0.6599	6.24e-05	0.0004	T	C
ENST00000370823.3;2176;A;G	ENST00000370823.3	2176	0.4356	8.27e-05	0.0005	A	G
ENST00000372927.1;2858;A;G	ENST00000372927.1	2858	0.5883	0.0004936	0.0019	A	G
ENST00000374943.4;403;G;C	ENST00000374943.4	403	-0.8885	7.39e-06	0.0006999	G	C
ENST00000377575.1;758;C;T	ENST00000377575.1	758	0.7248	3.94e-06	0.0006999	C	T
ENST00000377970.2;1248;G;A	ENST00000377970.2	1248	0.542	0.0005395	0.0006999	G	A
ENST00000378402.5;4644;C;A	ENST00000378402.5	4644	0.7211	5.9e-05	0.0017	C	A
ENST00000378802.4;942;G;A	ENST00000378802.4	942	-1.01	5.51e-05	0.0004	G	A
ENST00000379166.2;3378;C;T	ENST00000379166.2	3378	-0.4933	0.0005784	0.0005999	C	T
ENST00000380171.3;271;G;A	ENST00000380171.3	271	0.3077	0.0009309	0.0015	G	A
ENST00000381031.3;1934;C;T	ENST00000381031.3	1934	0.8191	7.73e-09	0.0001	C	T
ENST00000381401.5;505;A;G	ENST00000381401.5	505	-0.2866	0.000511	0.0028	A	G
ENST00000397979.3;447;C;T	ENST00000397979.3	447	-0.5152	0.0001584	0.0003	C	T
ENST00000398153.1;98;A;T	ENST00000398153.1	98	-0.4462	0.0001711	0.0015	A	T
ENST00000398587.2;343;T;C	ENST00000398587.2	343	1.901	0.00123	0.0019	T	C
ENST00000421990.2;928;G;A	ENST00000421990.2	928	-0.3518	4.28e-05	0.0002	G	A
ENST00000430365.2;442;C;T	ENST00000430365.2	442	0.4465	0.0002737	0.0003	C	T
ENST00000432224.1;168;G;A	ENST00000432224.1	168	1.061	0.0006066	0.0005	G	A
ENST00000432605.1;109;T;G	ENST00000432605.1	109	0.5585	0.002418	0.0027	T	G
ENST00000437043.3;1887;G;T	ENST00000437043.3	1887	-2.663	1.32e-09	0.0001	G	T
ENST00000443527.2;3018;A;C	ENST00000443527.2	3018	0.2801	0.0006983	0.0022	A	C
ENST00000450053.2;5014;G;A	ENST00000450053.2	5014	0.5581	0.0005636	0.0013	G	A
ENST00000472495.1;5;C;G	ENST00000472495.1	5	1.446	0.0002131	0.0004	C	G
ENST00000474844.1;581;A;T	ENST00000474844.1	581	-0.3608	0.0001334	0.0005	A	T
ENST00000521548.1;872;G;T	ENST00000521548.1	872	0.6893	0.0003837	0.0009999	G	T
ENST00000574425.1;234;C;G	ENST00000574425.1	234	-0.3801	3.71e-05	0.0002	C	G
