# Supplementary material for: Integrative analysis of RNA, translation, and protein levels reveals distinct regulatory variation across humans
Source: Genome Res. 2015 Nov;25(11):1610–21. doi: 10.1101/gr.193342.115 (PMC4617958; doi:10.1101/gr.193342.115)
Supplement: Supplemental Material [file supp_gr.193342.115_TableS6.xlsx]

## Sheet: Kozak_overlap_common_dbSNP_SNPs
Transcript	Strand	Kozak Sequence	Chromosome	Position	ID	Reference	Alternate
ENST00000389046.3	-	GTGGCCATGGC	10	103454402	rs61382490	A	T
ENST00000260743.5	-	ATCGCCATGGC	10	105209696	rs150638415	C	T
ENST00000251864.2	+	GCCTCGATGAG	10	115947589	rs138818268	C	T
ENST00000369230.3	+	GCTTAGATGCT	10	118187528	rs10885929	C	T
ENST00000298472.5	+	GGAGCCATGGC	10	119001209	rs554627946	C	T
ENST00000369144.3	-	GCCAAGATGCC	10	120840191	rs76398774	T	C
ENST00000263035.4	+	GTGAACATGGC	10	12111028	rs187324597	T	C
ENST00000263461.5	+	GCCGGGATGTT	10	122610929	rs200683907	C	T
ENST00000263461.5	+	GCCGGGATGTT	10	122610930	rs112459242	G	A
ENST00000329446.4	-	CGGAGTATGAT	10	124459312	rs185849609	G	A
ENST00000368636.4	-	GGCGCCATGTC	10	133795311	rs375582582	G	A
ENST00000368552.3	-	CGGGCCATGGT	10	135171516	rs146000004	C	A
ENST00000277632.3	-	CTCATCATGTC	10	15902303	rs2297882	A	G
ENST00000377799.3	-	GCGGGGATGGA	10	17243638	rs11254458	G	C
ENST00000377524.3	+	GCGGAGATGCC	10	17686334	rs17141457	C	T
ENST00000381312.1	-	TCGGCCATGGC	10	1779349	rs3750684	G	A
ENST00000320152.5	-	AGAAACATGGC	10	25241502	rs143356584	C	T
ENST00000497571.1	-	CCCGACATGGA	10	3827210	rs11544694	G	T
ENST00000298375.7	+	GCGGCCATGGG	10	4868513	rs557813638	G	A
ENST00000331173.4	-	GGAATCATGTC	10	53459315	rs189752299	C	T
ENST00000373968.3	-	AGGACCATGTC	10	54531400	rs370642219	C	T
ENST00000320301.6	-	CAGAAGATGTT	10	56424027	rs142016527	T	C
ENST00000380191.4	-	CCCGCCATGAA	10	5855225	rs3736460	G	A
ENST00000357917.4	-	TCATAAATGGA	10	62671305	rs2271126	G	A
ENST00000242480.3	-	GAGCAAATGAT	10	64575790	rs553201646	T	C
ENST00000242465.3	+	TTGGTCATGAT	10	70847918	rs115958601	T	C
ENST00000359655.4	+	GCCTCGATGTC	10	70940052	rs33998366	C	T
ENST00000373053.3	+	TGAGAGATGGC	10	74451906	rs564617095	A	G
ENST00000242505.6	+	AGGAGGATGAT	10	74928099	rs569932117	T	G
ENST00000299432.2	-	CAGGCCATGGC	10	75188040	rs375656123	C	T
ENST00000374094.4	-	CGCCCCATGGG	10	75457519	rs200342442	G	A
ENST00000425916.2	+	CTGGCCATGGG	10	77163015	rs7900698	A	G
ENST00000372117.3	+	GGAGACATGAG	10	85954516	rs114273269	C	T
ENST00000298767.4	-	GTCAAAATGAC	10	88277832	rs201045237	C	A
ENST00000263066.6	+	ACCAGCATGTC	10	88428446	rs532657940	A	G
ENST00000372037.1	+	TGAACAATGCC	10	88635779	rs11528010	C	A
ENST00000445946.3	-	GGCAGGATGGA	10	89622247	rs376068536	T	G
ENST00000331772.4	-	CTCGCCATGGC	10	90342949	rs186416966	G	A
ENST00000371418.4	+	GACTGCATGGA	10	95517902	rs202204627	A	G
ENST00000348459.5	+	CCAGGCATGCC	10	96305680	rs113154675	T	C
ENST00000371270.3	-	GCTTCAATGGA	10	96829159	rs142470035	T	C
ENST00000224337.5	-	AACAGAATGGA	10	98031160	rs7916154	T	C
ENST00000286067.2	+	GACCATATGCA	10	98741149	rs201068399	T	C
ENST00000266058.4	-	GGCACCATGGC	10	98945436	rs540879779	C	T
ENST00000266066.3	-	GCAGCCATGCG	10	99531593	rs374981598	C	T
ENST00000377038.3	-	TGGAGGATGGA	1	10532519	rs575744502	C	A
ENST00000370001.3	-	ACACACATGGA	1	109395287	rs113017253	G	A
ENST00000461096.1	-	AGTGGGATGGC	1	109618571	rs148869652	C	T
ENST00000369903.2	-	CTGGACATGGA	1	109825323	rs374123994	C	T
ENST00000369851.4	+	GCCGCCATGGG	1	110091339	rs3814308	C	T
ENST00000263468.8	+	TGAAGGATGCT	11	101786014	rs117883580	G	A
ENST00000241337.4	+	AGCACCATGCC	1	110210740	rs201905887	G	A
ENST00000540225.1	-	GTCACCATGTC	1	110282909	rs202171165	T	C
ENST00000369805.3	-	GTCAACATGTC	1	110304377	rs201060623	C	T
ENST00000282251.5	-	TTTACGATGGC	11	107328544	rs2276271	G	A
ENST00000483239.2	+	TTCACAATGGA	11	113186976	rs112352898	C	T
ENST00000260191.2	+	CCAGGAATGTT	11	113775653	rs72466468	G	A
ENST00000535401.1	+	GACATAATGGA	11	114167276	rs550782703	A	T
ENST00000325636.4	-	TTGAATATGGC	11	114271053	rs200550352	T	C
ENST00000375478.3	-	CTAATCATGAA	11	114465483	rs147128202	A	G
ENST00000227665.4	-	CAGGTAATGGC	11	116662579	rs651821	C	T
ENST00000292174.4	+	ACAGCCATGAA	11	118754649	rs10892307	C	G
ENST00000311413.4	+	CCTATCATGGA	11	119205830	rs12795576	A	G
ENST00000533341.1	+	GCCCCCATGCC	11	123301497	rs147335078	C	A
ENST00000375026.2	-	CTCACAATGGT	11	123756132	rs115828609	T	C
ENST00000278919.3	-	GCAAGAATGGA	11	125359678	rs73628448	G	A
ENST00000278903.6	+	GAAGAGATGGC	11	125442423	rs190131090	G	A
ENST00000263578.5	+	GGGGTTATGAT	11	126139100	rs1786702	T	C
ENST00000392678.3	+	CACGCTATGGC	11	126160787	rs113042259	G	A
ENST00000524964.1	-	AGGAAAATGAT	11	126174164	rs695029	C	T
ENST00000361127.4	+	GGGAAAATGGC	1	113616025	rs185447635	G	A
ENST00000334636.5	-	GGGCCGATGTG	11	14913748	rs199997444	A	G
ENST00000486207.1	-	GGTGTCATGGG	11	14992744	rs564910296	C	T
ENST00000360001.6	-	CGCCCCATGGT	1	1164179	rs76230175	G	A
ENST00000228136.4	+	GCAAGGATGAG	11	16760323	rs76805229	A	G
ENST00000369466.3	+	AGCGAAATGGA	1	117602965	rs202173875	C	A
ENST00000330388.2	-	GGAGCCATGCG	1	1182067	rs555749885	G	A
ENST00000527671.1	-	ACGCGGATGAG	11	18210922	rs114019691	G	A
ENST00000251968.3	-	GCCGTCATGGC	11	18548367	rs186606933	G	C
ENST00000369416.3	+	GCCACGATGGG	1	119958047	rs116449508	G	T
ENST00000524983.2	-	CCTACCATGAT	11	20181876	rs79411094	G	A
ENST00000324559.8	+	GCGAAGATGGG	11	22215038	rs138260594	G	A
ENST00000456145.2	-	GAAGACATGGC	11	2323089	rs188839109	C	T
ENST00000318627.2	+	TCCAGAATGGT	11	27016072	rs77985176	G	A
ENST00000528583.1	+	GGAAACATGGC	11	27076976	rs551267414	A	T
ENST00000528583.1	+	GGAAACATGGC	11	27076977	rs2305095	C	T
ENST00000241051.3	+	AGGGCCATGGC	11	33037501	rs115832789	C	T
ENST00000395833.3	-	TCCCCAATGTC	11	33890934	rs528808025	G	A
ENST00000227868.4	+	GTCAAGATGGC	11	34938199	rs3818401	C	G
ENST00000378785.2	+	CAGGCCATGTC	1	1386065	rs376884451	T	C
ENST00000378832.1	+	CGGAGTATGAG	11	44069589	rs3094398	G	A
ENST00000399269.2	+	GGAGGGATGTC	11	45234631	rs141398573	G	T
ENST00000361928.2	-	GCCACCATGTC	1	145515696	rs72701872	A	T
ENST00000314134.3	+	GCTACCATGAA	11	45827350	rs3808976	A	G
ENST00000241014.2	+	CCGAGAATGGC	11	45907367	rs111751468	C	G
ENST00000369258.4	+	GGCCCGATGGA	1	146714354	rs147494800	A	T
ENST00000326674.9	+	GCCGGGATGGC	11	47587171	rs576084961	C	G
ENST00000369167.1	-	GCAAAAATGCC	1	149783883	rs201696048	G	A
ENST00000271628.8	-	TTCGCCATGGC	1	149899657	rs587753787	A	G
ENST00000555099.1	+	AAATACATGGC	11	49973979	rs28378220	C	T
ENST00000368947.4	+	AGCACCATGTC	1	150955582	rs267731	A	G
ENST00000368868.5	-	GGCAGCATGGC	1	151345119	rs115507791	C	T
ENST00000326413.3	+	GAAATTATGCT	1	151686983	rs939592	T	A
ENST00000271835.3	-	TCAAAGATGCC	1	152384713	rs60680249	T	C
ENST00000368783.1	+	GCCAGCATGTC	1	152648491	rs12073860	C	G
ENST00000417924.2	+	GCCAGGATGTC	1	152659319	rs199946298	G	C
ENST00000335535.3	+	ACCAAGATGTC	1	152681553	rs151125573	T	A
ENST00000330597.3	-	GACGCCATGGG	11	5271037	rs557493532	C	T
ENST00000336906.4	-	GACGCCATGGG	11	5275961	rs569136859	C	T
ENST00000368766.1	+	GCCGAGATGTC	1	152799946	rs191474114	G	A
ENST00000431011.2	+	CAAGCAATGTC	1	152815998	rs139252977	T	C
ENST00000368764.3	+	TCTAAGATGTC	1	152882275	rs61731344	T	C
ENST00000295367.4	+	TGAAGCATGAG	1	152975495	rs2075739	G	A
ENST00000368758.3	-	AGCAGGATGTC	1	153012826	rs190689272	G	T
ENST00000380224.1	-	CCTACCATGTG	11	5323175	rs113985785	A	G
ENST00000328813.2	-	TACACTATGTG	11	5345524	rs80024156	A	C
ENST00000368702.1	-	GGCACCATGGG	1	153588340	rs11548103	C	T
ENST00000368680.3	+	GAGGCCATGCC	1	153651589	rs13305995	C	T
ENST00000361217.4	-	GGGGCCATGGC	1	153916856	rs74115717	C	G
ENST00000341449.2	+	TTTGCTATGGG	11	5474721	rs138083584	G	C
ENST00000314259.3	+	TGAGAAATGGA	11	55432646	rs149371777	G	A
ENST00000333973.2	+	GGAGACATGGG	11	55578940	rs118108607	G	A
ENST00000322653.4	-	AGATTTATGCC	11	5566751	rs114189564	C	A
ENST00000375999.3	+	GAGAGGATGAA	1	15578280	rs146550512	G	T
ENST00000302124.2	+	ATGTAAATGGC	11	55860780	rs1842700	G	A
ENST00000279783.2	+	ACCAAGATGAA	11	56113516	rs1905055	T	C
ENST00000295694.5	+	CCCAGGATGAC	1	156255022	rs34671330	C	T
ENST00000362007.1	-	GGCCGTATGCG	1	156265439	rs142959258	G	C
ENST00000528616.2	-	CAGGAAATGTC	11	56310730	rs184106423	A	C
ENST00000380034.3	-	GCTACTATGGC	11	5701409	rs3824949	G	C
ENST00000378323.4	+	GCCCAGATGGC	11	57365748	rs185342631	C	T
ENST00000534711.1	-	CCCGTCATGCC	11	57414583	rs73480570	C	T
ENST00000317121.3	+	TGAATCATGAA	11	5757746	rs147042944	C	A
ENST00000335397.3	+	GGTGTCATGGC	11	57946912	rs76606441	G	A
ENST00000311591.3	+	GGATGGATGGC	11	57957960	rs61902821	T	C
ENST00000332539.4	-	CCCACGATGTC	11	60621201	rs190529714	G	T
ENST00000301765.5	-	GGAAGGATGGA	11	60906301	rs375773936	T	C
ENST00000325558.6	+	AGAACCATGAA	11	60971041	rs78669446	A	G
ENST00000368003.5	+	TCCAAGATGGC	1	161123786	rs532077007	A	G
ENST00000334888.5	+	CAGCGTATGCT	11	61160102	rs7107543	G	T
ENST00000334888.5	+	CAGCGTATGCT	11	61160108	rs569734777	T	C
ENST00000394818.3	+	GCCACCATGGG	11	61895638	rs1792947	G	T
ENST00000244930.4	+	CTCGCCATGAA	11	61976201	rs116252301	G	A
ENST00000278282.2	+	TCCACCATGAA	11	62186565	rs41535344	A	C
ENST00000397542.2	-	GCCAAGATGGG	11	624903	rs144333629	C	T
ENST00000254521.3	+	GCGAAGATGCG	1	162760586	rs189050827	C	T
ENST00000254521.3	+	GCGAAGATGCG	1	162760587	rs369084131	G	C
ENST00000417740.1	-	GTCTCAATGGG	11	62911257	rs72922304	C	A
ENST00000321460.5	+	GCCGCCATGCC	11	63998324	rs569347865	G	A
ENST00000356786.5	+	CCGGGCATGGA	11	64107735	rs663743	G	A
ENST00000334205.4	+	CCCGCCATGGG	11	64126704	rs547326193	C	T
ENST00000301891.4	+	CTGTTCATGGC	11	64323476	rs141159367	C	T
ENST00000530719.1	-	GGCAAGATGTG	11	64856500	rs525781	A	G
ENST00000377185.2	+	GGTGTTATGCT	11	64937706	rs146523202	T	C
ENST00000377185.2	+	GGTGTTATGCT	11	64937708	rs141151195	T	C
ENST00000526623.1	-	GGGGGGATGGG	11	64949152	rs17881181	C	T
ENST00000526623.1	-	GGGGGGATGGG	11	64949155	rs532781711	C	G
ENST00000359842.5	-	GTAAACATGTA	1	165414131	rs57955749	G	A
ENST00000335987.3	+	TCGAAAATGCC	11	65554840	rs187771610	C	T
ENST00000307886.3	+	ACCGGCATGGC	11	65647325	rs75558232	C	T
ENST00000354775.4	-	CCACTCATGTT	1	165667795	rs201507277	T	G
ENST00000354775.4	-	CCACTCATGTT	1	165667801	rs377297617	G	A
ENST00000376904.5	-	GCGGCCATGGC	11	66056457	rs7945723	G	A
ENST00000359957.3	-	GTCCAGATGCC	11	66109705	rs531866309	T	A
ENST00000310442.3	-	CAGGCCATGGG	11	66313479	rs555915896	T	C
ENST00000333861.3	-	GGCTCTATGAT	11	66360492	rs371335115	C	T
ENST00000533244.1	+	TCCAGAATGGC	11	66360730	rs75550902	A	T
ENST00000370509.4	-	ACCGCCATGGC	1	167522984	rs571363025	T	C
ENST00000367838.1	-	CTGACCATGAG	1	168074093	rs200635937	A	T
ENST00000299454.4	+	ATACTTATGGC	11	6866910	rs7949174	A	G
ENST00000362034.2	-	GCGGCCATGGC	11	68671277	rs186971044	A	G
ENST00000255078.3	+	GCGGCGATGGC	11	68671419	rs4930624	C	T
ENST00000307322.4	+	ATCCTCATGAG	11	6890985	rs147200413	C	T
ENST00000379829.2	+	AGAAGAATGAT	11	6897877	rs112578149	G	A
ENST00000367815.3	+	ATCGCCATGGC	1	169076067	rs144750047	C	A
ENST00000236137.5	-	CCCCGGATGGA	1	169455008	rs2072757	G	A
ENST00000398531.1	+	AGAATCATGGG	11	71276631	rs200890184	A	T
ENST00000398531.1	+	AGAATCATGGG	11	71276632	rs36164574	T	C
ENST00000359244.4	+	CCCGTCATGGC	11	71498587	rs200393321	C	A
ENST00000258324.1	-	AGGATAATGTA	1	172411768	rs13932	T	C
ENST00000367696.2	-	GAAGCAATGCC	1	173962126	rs189291517	C	T
ENST00000251507.4	+	ACTGAAATGGA	1	174188291	rs373434556	C	G
ENST00000289575.5	+	GCAGTCATGGG	11	74862426	rs141893689	C	A
ENST00000476371.1	-	GACAACATGGC	1	174992544	rs201832306	T	A
ENST00000239462.4	+	CCAAGGATGAG	1	175046557	rs143192203	G	T
ENST00000527446.1	+	GGCAAGATGGC	11	75110589	rs3133187	A	G
ENST00000299492.4	+	GGAGTCATGGC	11	7570704	rs140595079	G	A
ENST00000367669.3	-	GTCACGATGTC	1	176176119	rs115466880	A	C
ENST00000375448.4	+	CCGACGATGGC	1	17634717	rs369679127	G	A
ENST00000353172.5	-	ATCTGCATGTG	11	77734294	rs78436350	A	T
ENST00000367619.3	+	AATACAATGGT	1	179271816	rs541178200	T	C
ENST00000537635.1	+	ATATTCATGAA	11	8008857	rs373853999	G	A
ENST00000529689.1	-	GAGGACATGAA	11	82997020	rs76297588	T	G
ENST00000367535.3	-	CTAATCATGTC	1	183559468	rs35681596	T	A
ENST00000251296.1	+	GGCACCATGCG	1	18434621	rs558305961	C	T
ENST00000397408.1	+	TGCGGCATGGC	11	850303	rs148169734	G	A
ENST00000375371.3	-	CCAGCCATGGG	1	19186155	rs142125210	G	A
ENST00000375341.3	-	CCCGAGATGCT	1	19229021	rs9426797	G	T
ENST00000417209.2	+	CGAAAAATGCC	1	192312162	rs374834847	G	A
ENST00000235382.5	+	ACGATAATGCA	1	192778199	rs143288784	A	G
ENST00000367439.3	-	CTGACCATGAT	1	193074511	rs148212596	A	G
ENST00000409977.1	-	TCGCCCATGAG	11	93583672	rs570082851	C	A
ENST00000227638.3	+	GCAGCCATGGC	11	93862480	rs374023714	T	C
ENST00000375254.3	-	CGGAAGATGGC	1	19536746	rs112584987	C	T
ENST00000440572.2	-	GGTAAGATGGG	11	96075065	rs117686537	C	T
ENST00000367288.4	-	GCCAAGATGTC	1	201915473	rs145228226	G	A
ENST00000367249.4	-	TCCGTCATGGG	1	202936332	rs567416582	A	G
ENST00000357681.5	+	GGCAAAATGAC	1	203652338	rs140289832	C	T
ENST00000264515.6	-	GCAGGGATGAA	1	205091003	rs137894641	C	G
ENST00000375089.3	+	AGCGGGATGCC	1	20637091	rs140153632	C	T
ENST00000391929.3	+	TGAGAGATGAA	1	207071174	rs374142851	A	C
ENST00000228347.4	+	AGCAGCATGGA	12	106751657	rs117873765	C	T
ENST00000008527.5	-	CCCGGCATGGG	12	107486744	rs202236977	G	A
ENST00000390675.2	-	TCAGACATGAC	12	11183934	rs562236488	T	A
ENST00000531678.1	-	TCAGACATGAT	12	11244826	rs139372865	C	G
ENST00000314045.7	-	GCCCGAATGGC	12	113623258	rs561085514	C	G
ENST00000261731.2	-	GGGGCTATGAT	12	113909304	rs369375356	A	G
ENST00000279575.1	-	AGCGAGATGCT	12	11463335	rs111244440	C	T
ENST00000500254.2	-	TGCAAGATGCT	12	11508484	rs148177558	G	A
ENST00000535496.1	-	TGAAGCATGTT	12	118490304	rs142866164	C	T
ENST00000257555.4	+	CGAGCCATGGT	12	121416568	rs561269721	A	G
ENST00000324774.5	-	TGCACCATGTC	12	121712328	rs190149778	A	G
ENST00000324189.4	+	CCGTTCATGCT	12	122689161	rs12827843	C	G
ENST00000324189.4	+	CCGTTCATGCT	12	122689162	rs145969982	G	T
ENST00000528880.2	-	GCACTCATGAA	12	123201288	rs564699572	T	G
ENST00000442028.2	-	AGCAGGATGCG	12	123444783	rs533868077	C	A
ENST00000402868.3	+	GGAGCCATGGC	12	123868745	rs370843462	C	T
ENST00000543341.1	+	ACAGCCATGGT	12	124118409	rs11572913	G	A
ENST00000303372.5	+	TAAGGCATGGG	12	124155786	rs141768405	G	A
ENST00000356219.3	-	ACCACCATGTC	12	124979803	rs531976037	T	G
ENST00000261693.6	-	GCAGACATGGG	12	125348263	rs4238001	C	T
ENST00000261693.6	-	GCAGACATGGG	12	125348271	rs202218916	G	A
ENST00000299308.3	+	CGGGAAATGTT	12	125811165	rs552915157	G	A
ENST00000366974.4	+	GGCGCAATGCG	1	212965262	rs115784129	C	G
ENST00000498926.2	+	AGCGGCATGGC	12	133287459	rs7486453	C	T
ENST00000316048.2	-	GGAAATATGGC	12	14959620	rs74068129	C	T
ENST00000366933.4	+	GAGACCATGGC	1	217804724	rs193045993	G	A
ENST00000382722.5	-	GAGCTCATGGT	12	2027641	rs375018727	A	G
ENST00000366910.5	+	CCAGCCATGGG	1	220960288	rs537057905	T	C
ENST00000256958.2	+	TCAATCATGGA	12	21294506	rs180888034	A	C
ENST00000307378.6	-	AGCAACATGGG	12	21487585	rs139732500	G	T
ENST00000539393.1	+	GAAGCAATGGG	12	21526282	rs112357636	A	T
ENST00000444129.2	-	AAAAGAATGGC	12	21652503	rs146924988	A	G
ENST00000570156.1	+	ACCCTCATGGA	1	228399482	rs11804508	C	G
ENST00000366684.3	-	GACACAATGTG	1	229568866	rs186826063	G	A
ENST00000374639.3	+	TCCGGGATGGA	1	22970514	rs2935537	G	A
ENST00000374639.3	+	TCCGGGATGGA	1	22970520	rs551820328	G	T
ENST00000262861.4	-	GTAGACATGAG	1	232651082	rs545316534	T	C
ENST00000366609.3	-	TCGGACATGGC	1	234745244	rs138550036	C	G
ENST00000408888.3	-	GTAAGAATGGC	1	235324545	rs66929873	T	A
ENST00000389794.3	-	TCGGTCATGAG	1	235993722	rs141317482	G	A
ENST00000334232.4	+	ATCGCCATGGG	1	236557742	rs79233817	G	A
ENST00000374479.3	-	GTAGCGATGCG	1	24194773	rs2070955	G	A
ENST00000534854.2	-	CAAGCCATGGG	12	42631987	rs7971397	T	C
ENST00000366541.3	+	GCGTGCATGGC	1	243419472	rs113193158	G	A
ENST00000408896.2	-	GGGAATATGGA	1	247921712	rs78522466	C	T
ENST00000389212.3	-	AGAAACATGAA	12	48152344	rs540490433	C	G
ENST00000547602.1	-	GAACGTATGAA	12	48418894	rs550123380	C	T
ENST00000280684.3	+	GGGGGCATGAG	12	4919211	rs577615382	A	G
ENST00000394963.4	+	GGGAAGATGGC	12	50479148	rs529129659	G	A
ENST00000552815.1	+	TGCATCATGAG	12	50517193	rs546749624	G	A
ENST00000317551.6	-	CGTAAGATGGC	12	50561086	rs78501653	G	A
ENST00000398455.3	+	AAAAAAATGTC	12	51347786	rs61731820	C	T
ENST00000252250.6	-	GGAACCATGGC	12	52867520	rs199806927	A	G
ENST00000293745.2	-	CGAGCCATGAG	12	52995242	rs117967907	G	A
ENST00000546897.1	-	TCTACCATGTC	12	53298769	rs1065306	A	G
ENST00000420463.3	+	CCCAACATGGC	12	53400263	rs200015278	C	T
ENST00000308796.6	+	ACCACCATGAA	12	55248362	rs76543974	C	T
ENST00000343870.4	+	TCAACTATGAG	12	55641075	rs7301705	A	G
ENST00000308197.5	+	GCGCGCATGGC	12	56660905	rs60542959	G	T
ENST00000257979.4	-	CCTGCCATGTG	12	56848401	rs117788190	A	G
ENST00000431731.2	+	CACACAATGAA	12	57918085	rs61741508	C	A
ENST00000542466.2	+	TGCGTGATGAC	12	58120775	rs34772922	G	C
ENST00000454289.2	+	AGAGAGATGTC	12	58176589	rs35957924	C	T
ENST00000374276.3	-	GACTGCATGGA	1	26372389	rs146020822	C	T
ENST00000228918.4	+	GCCGCCATGCT	12	6493524	rs201263587	C	T
ENST00000374253.5	+	TGGGCCATGGA	1	26504036	rs17356937	G	A
ENST00000315579.5	+	AGTAGAATGGC	12	6604269	rs149571298	C	G
ENST00000436292.1	-	GGGGATATGAA	1	26695062	rs181580836	T	C
ENST00000229243.2	-	CCGGCCATGAG	12	6756537	rs116290146	G	A
ENST00000435120.1	-	ATCAGGATGTT	12	6861503	rs141110142	T	C
ENST00000229268.8	+	GGTGTCATGGC	12	6961339	rs187058578	G	C
ENST00000261267.2	+	GTCAACATGAA	12	69742188	rs513342	C	T
ENST00000524270.1	-	ACCTCCATGGG	12	6982066	rs545526842	G	A
ENST00000545581.1	+	CGCCCTATGGC	12	7053282	rs113296395	C	T
ENST00000401095.3	-	CGTGGGATGCT	1	2706156	rs370237500	T	A
ENST00000401095.3	-	CGTGGGATGCT	1	2706162	rs557596918	G	C
ENST00000393330.2	-	TCCGAAATGGC	12	71551461	rs17109358	C	T
ENST00000266659.3	+	CAAAGCATGCG	12	75874665	rs149257218	G	A
ENST00000229304.4	-	AGCACCATGAC	12	7818468	rs139646668	T	C
ENST00000373954.5	+	CCGGACATGGC	1	28052588	rs567370122	G	C
ENST00000373894.3	+	CCGAGGATGAG	1	28261691	rs375183514	G	A
ENST00000256151.7	-	GCTGCAATGGC	12	82752152	rs552343625	C	T
ENST00000359286.4	+	CGGACAATGCA	12	8325226	rs74060111	A	C
ENST00000307435.6	-	ACGAAGATGAT	12	8377433	rs60923678	G	A
ENST00000256010.5	+	TGAAAGATGAT	12	86268179	rs1800832	A	G
ENST00000266719.3	-	GCTATAATGGC	12	91450060	rs141931395	A	G
ENST00000549802.1	-	TGAGAAATGAA	12	92387182	rs183397084	C	A
ENST00000378485.1	+	TTGAGGATGTT	12	92818456	rs115703280	G	A
ENST00000343702.4	-	CCGGCCATGGG	12	96184092	rs576479364	G	T
ENST00000524981.2	+	GTCAATATGGC	12	96883383	rs547557284	T	A
ENST00000327839.3	-	TACTGTATGGT	12	9885865	rs373298472	T	C
ENST00000376360.1	+	GGGAAGATGGC	13	100258945	rs375691452	G	C
ENST00000375713.1	+	AGCAGTATGAG	13	112278338	rs7992732	G	A
ENST00000375353.3	+	CTCGGGATGCA	13	114462238	rs542839888	T	C
ENST00000375299.3	+	TGCGGCATGCG	13	115047114	rs143755276	C	G
ENST00000373713.2	-	ATCACTATGGT	1	31845864	rs143544654	T	C
ENST00000382848.4	-	TAGAAGATGGA	13	20763726	rs148136545	A	T
ENST00000298248.7	-	CCAACCATGGC	13	21099934	rs140651902	G	A
ENST00000373703.4	-	ATCACCATGGC	1	32110466	rs55959462	G	C
ENST00000309594.4	+	GGCACCATGTT	13	21751052	rs182070091	C	T
ENST00000382172.3	-	GCTAGAATGCT	13	24463461	rs140820506	C	G
ENST00000381736.3	+	CCAGACATGTC	13	25875910	rs113070714	A	C
ENST00000373602.5	+	CGCCCAATGGA	1	32667532	rs185098317	G	A
ENST00000373534.3	+	GACAGCATGGA	1	32828301	rs147160446	G	C
ENST00000381026.3	+	TACAGCATGGT	13	28519393	rs182783310	C	T
ENST00000468695.1	-	CGGTGGATGAA	1	33116170	rs541464475	C	T
ENST00000336934.4	-	GCCGAGATGTT	13	33859779	rs77153439	G	C
ENST00000354858.6	-	GCGGACATGGC	1	33502433	rs2335940	C	A
ENST00000379747.4	-	CTCAAGATGAT	13	38172867	rs17197663	G	A
ENST00000379705.3	-	TGAAACATGGC	13	38357471	rs3904512	G	A
ENST00000326544.5	+	TAGACAATGGC	1	33944890	rs201013304	A	G
ENST00000310521.1	+	TTTGTGATGTC	13	46276525	rs149308273	G	A
ENST00000444610.2	-	CCCGGCATGTC	13	52378251	rs143471294	G	A
ENST00000377942.3	-	GGAGGCATGAG	13	53422572	rs115083515	G	A
ENST00000219022.2	+	GACAAGATGAG	13	53602970	rs2298229	A	G
ENST00000373137.1	+	TGGCCAATGTG	1	36793433	rs202025404	C	G
ENST00000377844.4	-	TAAAGCATGTC	13	70681836	rs184946008	T	C
ENST00000378251.1	-	GGCGCCATGGC	1	3713044	rs549833599	G	T
ENST00000377767.4	-	GGCAAGATGCT	13	73355975	rs577492927	C	T
ENST00000377615.3	-	CTGCCCATGGA	13	76111942	rs555410964	G	A
ENST00000377595.3	+	GCGGCCATGGA	13	76123955	rs138830150	C	T
ENST00000341547.4	+	ACTGCTATGAA	13	76195833	rs143470231	A	G
ENST00000377208.4	-	GCCACGATGAT	13	79177467	rs202193336	C	T
ENST00000360786.3	-	ATAAACATGGG	1	39341775	rs540022787	A	G
ENST00000376958.4	+	ACGGGCATGGG	13	95254186	rs182938123	G	C
ENST00000372856.3	-	GGGGAGATGAA	1	40041627	rs200495178	C	T
ENST00000324379.5	+	AGCAAGATGGC	1	40204569	rs146968021	C	T
ENST00000372705.3	+	GGCATCATGCC	1	40945031	rs77179720	A	G
ENST00000534062.1	-	GACGAAATGAT	14	101351127	rs7160896	T	A
ENST00000360184.4	+	GACACCATGTC	14	102431024	rs17511858	A	G
ENST00000359520.7	+	TTGGCCATGGC	14	102843057	rs17100874	C	T
ENST00000262241.5	+	CCGCCGATGCC	14	103059220	rs1057881	G	A
ENST00000447393.1	+	GGCGCCATGGC	14	105781256	rs587751332	A	C
ENST00000447393.1	+	GGCGCCATGGC	14	105781257	rs587613193	T	C
ENST00000390595.2	-	CTCACCATGGA	14	106471685	rs34315295	G	A
ENST00000390600.2	-	CTCACCATGGA	14	106552732	rs587598935	T	C
ENST00000390609.2	-	CTCACCATGGA	14	106725656	rs112014369	G	A
ENST00000390609.2	-	CTCACCATGGA	14	106725658	rs12436700	G	A
ENST00000434710.1	-	CGCACCATGGA	14	106926649	rs553752453	C	A
ENST00000434710.1	-	CGCACCATGGA	14	106926649	rs61999678	C	A
ENST00000434710.1	-	CGCACCATGGA	14	106926650	rs572314336	G	A
ENST00000455737.1	-	AAGAACATGAA	14	107083689	rs372815640	C	T
ENST00000390630.2	-	AAGAACATGAA	14	107095560	rs529589145	A	C
ENST00000390632.2	-	CTCGCCATGGA	14	107131484	rs2904626	C	T
ENST00000390634.2	-	TCCACCATGGA	14	107179268	rs10144801	A	G
ENST00000409832.3	+	AAGCAGATGGT	14	19553420	rs544021747	G	A
ENST00000258821.3	-	CGGGAGATGAT	14	20774102	rs138814507	G	A
ENST00000328444.5	+	GGCAAAATGAA	14	20978627	rs184170027	C	A
ENST00000556585.2	+	GGAGCCATGGA	14	21569504	rs114078341	T	C
ENST00000262709.3	+	GTGAAGATGGA	14	21945435	rs150058163	A	C
ENST00000390440.2	+	CCAAACATGTC	14	22392312	rs33998628	A	G
ENST00000390446.3	+	CCAGCCATGCT	14	22471451	rs188331667	T	C
ENST00000390449.3	+	GAAGGAATGGA	14	22520777	rs36209050	G	A
ENST00000390451.2	+	GGAGGAATGGA	14	22554727	rs145695303	G	A
ENST00000390457.2	+	GACAAGATGGT	14	22616049	rs61738724	G	T
ENST00000299088.6	-	TCCGCCATGTC	14	23468235	rs60785917	C	T
ENST00000356287.3	-	ACCAAGATGAC	14	23876437	rs183611755	G	T
ENST00000313250.5	+	TGATCCATGCA	14	24422995	rs4457918	T	G
ENST00000345363.3	+	ACGGCCATGAA	14	24784853	rs200157913	C	A
ENST00000345363.3	+	ACGGCCATGAA	14	24784854	rs35403650	G	T
ENST00000415220.2	-	CGAGCGATGAG	14	30396723	rs554353626	C	T
ENST00000281081.7	+	CGCGTCATGGG	14	32030645	rs45468395	C	T
ENST00000372514.3	+	GTTCGGATGGA	1	43296118	rs12124733	G	A
ENST00000362031.4	-	AGGGAGATGCG	14	35099364	rs144064914	T	C
ENST00000372492.4	+	GAGATCATGTC	1	43638423	rs150584200	T	G
ENST00000310955.6	+	GCTCCCATGGC	1	43824883	rs200414342	T	G
ENST00000342213.2	-	CAGAGAATGAG	14	38725229	rs372040859	C	G
ENST00000399206.1	-	GACCAAATGAC	14	50472515	rs113920014	C	T
ENST00000372224.4	+	CTCCGAATGGC	1	45205606	rs147637903	T	A
ENST00000306051.2	+	CACGCCATGAA	14	52734531	rs145500408	C	T
ENST00000395686.3	-	GCTGCAATGGG	14	53162202	rs202157479	C	A
ENST00000216416.4	-	CCAGCCATGGC	14	54908046	rs376569437	G	A
ENST00000335867.4	+	GGGGCCATGAA	14	59104918	rs555216489	G	A
ENST00000332981.5	+	GCCGGCATGTC	14	61788816	rs45582331	C	T
ENST00000372003.1	+	GCCACCATGCA	1	46646780	rs2234266	A	G
ENST00000311864.3	+	AGCGCAATGAA	14	67664875	rs182095795	C	T
ENST00000311864.3	+	AGCGCAATGAA	14	67664876	rs186752717	G	A
ENST00000381269.2	-	TCGTGTATGGC	14	70635144	rs11849161	G	A
ENST00000576409.1	-	AGCGGGATGGA	1	47134060	rs562789171	C	T
ENST00000334988.2	-	CGCGGTATGAC	14	73989859	rs1074501	C	T
ENST00000311148.4	+	GCTCGGATGGC	14	74004130	rs375905406	C	G
ENST00000326303.4	+	TCCAAGATGTC	14	74058668	rs139476628	C	T
ENST00000371904.4	-	TGCACCATGAG	1	47407109	rs182047196	G	A
ENST00000355774.2	-	CCTACCATGAT	14	75516361	rs146166860	T	C
ENST00000355774.2	-	CCTACCATGAT	14	75516362	rs28756977	A	C
ENST00000393774.3	+	AAATTCATGCA	14	77292839	rs200362790	A	T
ENST00000553586.1	+	GATACCATGAC	14	77790943	rs113602814	A	G
ENST00000216471.4	+	CTGCAAATGGC	14	77843763	rs114162430	T	G
ENST00000393545.4	+	CTAAGCATGGA	14	88852166	rs4904448	G	A
ENST00000282146.4	+	CCGGCCATGGC	14	90528549	rs200035418	C	T
ENST00000342144.2	+	CGCGATATGCC	14	93813611	rs74529920	C	G
ENST00000342144.2	+	CGCGATATGCC	14	93813619	rs201659311	C	G
ENST00000393115.3	+	CCAACCATGGG	14	94563286	rs114668841	G	A
ENST00000335968.3	-	GCCGCGATGGC	15	102264591	rs549428883	C	A
ENST00000242719.3	+	CGGAAGATGGG	1	51702424	rs141818971	G	A
ENST00000371733.3	-	AACACCATGGC	1	51984900	rs147314878	C	A
ENST00000328795.4	+	GAAGAAATGAA	15	22382470	rs368077063	G	A
ENST00000283645.4	+	CGGAACATGGC	15	22833520	rs4778301	G	T
ENST00000313077.7	+	CCCAGGATGGC	15	22925782	rs139395765	G	C
ENST00000337451.3	-	AACGAAATGAG	15	23021339	rs12594490	C	T
ENST00000563110.1	+	TCCGGAATGTG	15	30919020	rs186081926	C	T
ENST00000454250.3	+	CTCAACATGCG	15	32322802	rs375844242	G	A
ENST00000557872.1	+	ACCAGGATGGA	15	34354914	rs201746968	C	A
ENST00000267750.4	+	GTTGCCATGAC	15	34517314	rs150984739	C	T
ENST00000267884.6	-	GCCGCGATGGT	15	40331323	rs375009567	C	A
ENST00000441369.1	+	GGCACCATGTT	15	40556983	rs201707008	C	T
ENST00000458580.2	-	ATTAGCATGGA	15	41518779	rs116189831	T	C
ENST00000260361.4	-	TGTACCATGGC	15	41689263	rs180730324	A	C
ENST00000249647.3	+	TTCATCATGGA	15	42804044	rs564634418	C	G
ENST00000260403.2	+	GGCGGCATGGC	15	43426000	rs144183235	C	T
ENST00000319327.6	-	ACAAGGATGGT	15	44092186	rs184593076	C	T
ENST00000263795.6	+	CGAAAGATGTC	15	44119235	rs191160757	C	A
ENST00000544417.1	+	GCCGAGATGTC	15	45003741	rs545635107	C	T
ENST00000305560.6	+	TGTGCGATGGC	15	45694624	rs200760136	T	C
ENST00000302250.2	-	GTCGCCATGGT	1	55089071	rs17110842	C	T
ENST00000371273.3	+	CCTGCCATGAG	1	55271787	rs561734931	G	C
ENST00000249822.4	-	AGCACTATGTC	15	52861092	rs375145133	T	C
ENST00000321149.3	-	ACCGGAATGCC	15	55790530	rs3743205	C	T
ENST00000321149.3	-	ACCGGAATGCC	15	55790531	rs200602471	G	A
ENST00000249750.4	-	GCCACCATGAC	15	58357854	rs34645259	C	T
ENST00000219919.4	+	CCCAAGATGCA	15	58430763	rs34945403	A	G
ENST00000348370.4	+	TTTCCCATGTC	15	59323018	rs142344212	T	G
ENST00000396065.1	+	GTGACGATGGT	15	59910436	rs143190312	C	T
ENST00000267859.3	-	GGGGGGATGCT	15	59981636	rs6151434	G	A
ENST00000261520.4	-	AGGAAGATGAG	15	60770178	rs61753856	T	G
ENST00000300141.6	-	TGCAACATGGC	15	65804892	rs118088815	G	A
ENST00000307102.4	+	TCCAAAATGCC	15	66679684	rs77796976	A	G
ENST00000465139.2	-	CGAGAGATGGA	15	69113095	rs561580813	C	T
ENST00000395407.2	+	TCCAAGATGCT	15	69652418	rs78804299	A	G
ENST00000331090.6	+	CAGGACATGGC	15	73735523	rs72741460	G	A
ENST00000343932.4	+	GTACAGATGGC	15	75042078	rs143211242	A	C
ENST00000440863.2	-	GCCGGAATGGC	15	75135447	rs2290574	T	C
ENST00000563290.1	-	TAAAGAATGAT	15	77176158	rs3812908	T	C
ENST00000299518.2	+	GAAGCGATGGC	15	78441744	rs201115044	C	T
ENST00000220166.5	-	GCTGCGATGTG	15	79237324	rs1036939	C	A
ENST00000560560.1	-	CTTCGCATGAT	15	81201994	rs28450224	T	C
ENST00000261721.4	-	TGGAGGATGGC	15	83735904	rs200228998	C	T
ENST00000306072.5	+	AGGAACATGGC	15	89182596	rs3200942	A	G
ENST00000566497.1	-	CGCAGCATGCC	15	89456554	rs146809851	G	A
ENST00000394412.3	-	CTCGGCATGGG	15	90196166	rs62021460	A	C
ENST00000328649.6	-	GGGGCGATGGG	15	90777120	rs373839839	C	A
ENST00000418476.2	+	TCCGCGATGAC	15	91478553	rs554416110	C	T
ENST00000536829.1	-	GTGAAAATGTT	16	10641480	rs115794552	C	A
ENST00000434724.2	-	CCGATCATGGA	16	12009581	rs375631610	C	T
ENST00000253934.5	+	TCAGCGATGAC	16	1584276	rs79799097	G	T
ENST00000426508.2	-	TCCGTCATGGC	16	1657271	rs140403660	G	A
ENST00000261381.6	-	CCGAAGATGGT	16	17564658	rs117041807	G	C
ENST00000251143.5	+	GGGAAGATGGC	16	19567051	rs28384469	G	A
ENST00000520010.1	-	TTCACCATGCA	16	20702509	rs141778048	A	G
ENST00000424898.2	-	GGGACCATGCA	16	22012374	rs141574396	C	T
ENST00000261374.3	+	GGAGCCATGGC	16	22825927	rs566947220	G	C
ENST00000300093.4	+	GGGAGCATGAG	16	23690253	rs113428323	C	T
ENST00000397066.4	+	GCGGCGATGGG	16	2479482	rs13331598	G	C
ENST00000382350.1	-	CTGAGGATGGG	16	2581080	rs75801560	G	A
ENST00000424293.3	+	CAGGACATGCG	16	29049980	rs560982570	G	A
ENST00000253928.9	+	CCCGGGATGCC	16	2979683	rs374917617	C	T
ENST00000160827.4	+	AGTGGAATGGC	16	29802078	rs144408025	G	A
ENST00000308768.5	-	CCCGGCATGTC	16	29937358	rs200844395	G	A
ENST00000569466.1	-	CCCGTCATGCC	16	30366008	rs371622721	G	A
ENST00000399932.3	+	CCCGTGATGTT	16	304409	rs117105880	C	T
ENST00000319285.4	-	GGCGGCATGTC	16	30441305	rs374301748	G	A
ENST00000252797.2	-	GTTACCATGGC	16	30569500	rs200023668	C	T
ENST00000568114.1	-	GTTACCATGGC	16	30569500	rs200023668	C	T
ENST00000328796.4	-	CTCGCCATGGC	16	3066026	rs113281551	G	A
ENST00000326577.4	+	TGCACTATGGC	16	3070395	rs547713969	C	T
ENST00000318663.4	+	CCCAGGATGAA	16	30960606	rs368110163	C	A
ENST00000268281.4	-	AGCGCCATGGC	16	31161360	rs199955344	G	A
ENST00000302964.3	-	TGAGCCATGGG	16	31228347	rs150364107	C	A
ENST00000315678.5	-	CTGCTCATGAG	16	31448168	rs150789330	C	T
ENST00000315678.5	-	CTGCTCATGAG	16	31448170	rs139777721	T	C
ENST00000428155.1	+	GCCCTGATGGC	16	3197336	rs56976010	C	T
ENST00000219409.3	+	GCCGCCATGCT	16	330678	rs368146102	G	A
ENST00000319817.2	+	TCGGGGATGGG	16	34256752	rs114186820	C	T
ENST00000319817.2	+	TCGGGGATGGG	16	34256755	rs566837258	G	A
ENST00000576634.1	+	AGCGTTATGTC	16	3551067	rs78552393	T	C
ENST00000246957.5	-	TACGACATGGC	16	3767512	rs543597061	C	A
ENST00000398595.3	+	GCAGCAATGTC	16	4555521	rs17884406	C	G
ENST00000562435.1	-	GGGAACATGGC	16	47177524	rs562589845	G	A
ENST00000345988.2	-	GCCACCATGAA	16	4987050	rs376539573	G	T
ENST00000394697.2	+	TGGAGGATGCC	16	50322090	rs139493357	G	C
ENST00000350219.4	-	GTCTTCATGTC	16	5116027	rs370891235	G	A
ENST00000471389.1	+	GGCAGCATGAA	16	53738094	rs199561185	A	G
ENST00000360526.3	-	TCCACGATGTG	16	55866969	rs12149368	G	C
ENST00000334346.2	+	CTCCAAATGGA	16	56685863	rs114713886	C	T
ENST00000332374.4	+	CTTGCAATGGA	16	56703798	rs113557604	T	C
ENST00000219235.4	+	CAGAGCATGGA	16	57392733	rs4359426	A	C
ENST00000245206.5	-	TCCACCATGGC	16	58768129	rs11558171	C	A
ENST00000422424.2	-	TCCGCGATGGT	16	66968268	rs375950439	C	A
ENST00000317091.4	+	CCACCTATGAC	16	66969351	rs546092904	C	G
ENST00000219172.3	-	GAGACGATGGC	16	67867768	rs192016383	C	A
ENST00000336278.4	+	ACTGGAATGAG	16	69221071	rs564046431	T	G
ENST00000320623.5	-	AGAGCCATGGT	16	69760341	rs114238154	A	G
ENST00000268802.5	-	GCCAACATGGC	16	69788818	rs74560902	G	T
ENST00000549091.1	+	GGCGCCATGGC	16	699418	rs370799011	T	C
ENST00000429149.2	+	ACCACCATGCC	16	70680850	rs3813905	C	G
ENST00000338779.6	-	CAGAGCATGGA	16	70719695	rs537960209	G	A
ENST00000258173.5	-	GTGCTCATGGC	16	75590113	rs3743602	C	G
ENST00000037243.2	+	GCCGCCATGAA	16	75600380	rs201335061	C	T
ENST00000262345.1	+	TTGTTGATGGC	1	67786050	rs139325533	T	G
ENST00000566780.1	+	TCAGCCATGGC	16	78133671	rs11545028	C	T
ENST00000446344.1	-	ACGGACATGCC	16	87736125	rs118075941	G	A
ENST00000453996.2	+	GTGCCCATGTG	16	88772936	rs570424055	C	G
ENST00000317447.4	+	AGTGCAATGCT	16	89167094	rs7188200	T	C
ENST00000561538.1	-	CTTCACATGGA	16	9770690	rs191500496	C	T
ENST00000035383.5	+	CTGGAGATGAC	1	70225892	rs545752928	C	A
ENST00000262442.3	+	CGCGCGATGCG	17	11501814	rs12604013	C	T
ENST00000438665.2	-	GGCAGGATGCG	17	1389006	rs139514137	C	T
ENST00000420162.2	-	AGCAAGATGTT	17	14140155	rs143035846	C	T
ENST00000312280.3	-	GCCAGAATGCT	17	15164050	rs369779295	C	A
ENST00000395930.1	-	GGCATCATGGA	17	15234899	rs139229306	C	T
ENST00000331302.7	-	CGAGCCATGGC	17	177340	rs182282019	G	A
ENST00000308799.4	+	AGGATCATGGA	17	18647558	rs539416490	A	G
ENST00000299610.4	-	GACAGCATGAA	17	19290470	rs139308357	C	T
ENST00000263083.6	+	TACCACATGCG	17	1933453	rs371007597	G	A
ENST00000540040.1	+	GTCTGAATGGC	17	22023384	rs76850145	C	A
ENST00000268989.3	+	CACACCATGGG	17	2240986	rs144150639	G	A
ENST00000321765.5	-	TTGAAGATGTG	17	26925964	rs145549199	T	C
ENST00000415329.2	-	ACCAGCATGGC	17	27031066	rs140256102	G	A
ENST00000254928.5	+	GCTGTAATGGC	17	27182056	rs199929224	G	C
ENST00000394908.4	-	GGCGCCATGGG	17	27224594	rs7215982	G	A
ENST00000440741.3	+	GTCCAAATGAA	17	28268817	rs79556405	G	A
ENST00000261708.4	-	GACCTCATGGC	17	30228647	rs111907415	G	A
ENST00000269051.4	+	TCGGCCATGGG	17	30593206	rs117530048	G	A
ENST00000361952.3	+	GCCAAGATGGC	17	33288582	rs7216234	C	G
ENST00000248378.5	+	GGTGCGATGGC	17	3572436	rs146987134	G	T
ENST00000248378.5	+	GGTGCGATGGC	17	3572438	rs150979622	G	T
ENST00000360797.2	-	GGAATCATGCA	17	36896661	rs182900980	C	T
ENST00000418519.1	-	GGCGCAATGTT	17	38073569	rs138635056	T	C
ENST00000301659.4	+	GAGACAATGAC	17	38121945	rs191833662	C	T
ENST00000397043.3	-	GGCGGCATGGA	17	3867588	rs530118809	C	A
ENST00000312150.4	-	GATACCATGTC	17	38911525	rs139726500	G	T
ENST00000391418.2	-	ACCACCATGAC	17	39216302	rs201832186	T	G
ENST00000391354.1	+	GACACCATGAC	17	39431954	rs188966259	C	G
ENST00000167586.6	-	TGCACCATGAC	17	39743087	rs554016001	G	A
ENST00000311208.8	-	GCCACCATGAC	17	39780766	rs187586045	G	A
ENST00000311208.8	-	GCCACCATGAC	17	39780767	rs11553457	C	G
ENST00000269534.8	-	ACCCTGATGAA	17	39992199	rs138262483	A	G
ENST00000355067.3	+	ACTCGGATGCA	17	40274873	rs1122326	A	C
ENST00000253799.3	+	TCCACCATGCA	17	40996642	rs142042748	C	A
ENST00000315286.8	-	CCCAAGATGGC	17	42767125	rs113179032	G	A
ENST00000253408.5	-	AGCAGGATGGA	17	42992855	rs370571565	C	T
ENST00000398322.3	+	AGCAGCATGGG	17	43213515	rs199574823	G	T
ENST00000355530.2	+	GCTGGCATGGC	17	4337267	rs189761031	C	T
ENST00000314537.5	+	CCGAGGATGGG	17	43861906	rs371192812	C	G
ENST00000381556.2	-	GCGGAGATGGA	17	4458622	rs147814334	C	T
ENST00000328739.5	-	TACAGGATGGA	17	4689653	rs188599316	A	G
ENST00000515635.1	-	GGCAGGATGGC	17	47284787	rs56203218	T	A
ENST00000240333.6	-	CGTCTCATGGC	17	47785196	rs145682950	G	C
ENST00000329125.5	+	GTCCTCATGCC	17	4835895	rs2243093	T	C
ENST00000225969.4	-	GAAAGCATGGC	17	48450536	rs16948970	T	G
ENST00000508540.1	-	CCAGCCATGGT	17	48546178	rs202128383	T	C
ENST00000262013.7	-	GCCACCATGGA	17	49198023	rs373901137	C	T
ENST00000254853.5	-	GGCTGAATGGC	17	4937903	rs346823	C	A
ENST00000381209.3	+	GAGGAGATGGC	17	5323529	rs139561712	A	C
ENST00000360238.2	-	CGCAAAATGAC	17	55962931	rs3744092	G	A
ENST00000323777.3	-	GGGGCGATGGA	17	56565638	rs192564820	C	T
ENST00000284116.4	+	ACTGAGATGTC	17	57297966	rs143306984	C	T
ENST00000184956.6	-	GAAAAGATGGC	17	58156276	rs558396689	C	T
ENST00000290866.4	+	CGCGTCATGGG	17	61554460	rs558593002	G	T
ENST00000392886.2	-	GCGGCAATGGC	17	61950979	rs1130670	G	A
ENST00000556440.2	+	TGAAACATGGC	17	62503211	rs371240627	G	A
ENST00000433363.2	-	CGCGCGATGGC	17	6616657	rs201070767	C	G
ENST00000344935.4	-	CGGAAGATGCA	17	71257962	rs148897875	C	T
ENST00000310226.6	-	GAGTCCATGGA	17	72889696	rs2683273	A	G
ENST00000301587.4	-	CCCAAAATGGC	17	73038746	rs9660	T	C
ENST00000245552.2	-	GCGGCGATGGC	17	73127803	rs554601207	C	T
ENST00000323675.3	+	GACCCCATGGC	17	7323704	rs545531635	A	G
ENST00000245539.6	+	GCCAAGATGGC	17	73257986	rs8075276	C	T
ENST00000392564.1	-	CTCAGAATGGA	17	73389710	rs534714444	T	C
ENST00000293201.8	+	TACACCATGCA	17	73617209	rs117500462	C	T
ENST00000334586.5	+	CAGCCGATGAT	17	74075344	rs192357824	C	T
ENST00000323374.4	+	CCAGCAATGTC	17	74381182	rs148098542	C	T
ENST00000322630.2	-	CCTGTAATGTG	17	76897913	rs140833110	C	T
ENST00000310924.2	-	CCGGCAATGTC	17	77987351	rs61748841	G	A
ENST00000390015.3	+	CCAACCATGGG	17	78078384	rs560511228	C	T
ENST00000576544.1	-	GTCGCAATGGA	17	79479383	rs200999469	C	T
ENST00000329138.4	+	GTCGCCATGGG	17	79651096	rs146058677	C	T
ENST00000399413.3	+	AGAGGCATGGG	17	7983317	rs375743757	G	T
ENST00000392359.3	-	GCGGTCATGGA	17	79980743	rs372498667	C	T
ENST00000392341.1	+	CTGGCCATGGG	17	80193882	rs112712439	G	A
ENST00000328248.2	+	CTCAAGATGGA	17	8243371	rs140462392	T	C
ENST00000293845.3	-	GCCACCATGAG	17	8647931	rs10852904	G	C
ENST00000328794.6	-	GAGATTATGGC	17	8661706	rs145552977	C	T
ENST00000173229.2	+	CGCAGCATGAT	17	8925689	rs147316711	G	A
ENST00000306357.3	-	TGCAGGATGGC	17	9479128	rs539601987	T	C
ENST00000320477.9	+	CGCGCCATGGA	18	12254378	rs145988603	G	T
ENST00000217652.3	+	ACCACCATGTC	18	3253245	rs79676951	C	T
ENST00000261326.5	+	GGGGCCATGGC	18	33767498	rs117090508	G	A
ENST00000356157.7	+	TGTCTGATGGA	18	44526837	rs9973035	T	C
ENST00000261292.4	+	GGCAGGATGAG	18	47088678	rs199615862	G	T
ENST00000370673.3	+	GCGGCCATGCG	1	84764245	rs554635247	G	T
ENST00000434239.3	-	GAAATCATGGT	18	5197057	rs115401521	T	C
ENST00000327228.3	+	GGCAGGATGGC	18	580412	rs115842359	G	A
ENST00000382771.4	+	CCCGCAATGGA	18	61151659	rs77710366	G	T
ENST00000343998.6	-	CTGGCCATGGC	18	72124495	rs574224101	G	A
ENST00000370473.4	-	CTGGACATGGC	1	89528914	rs145654492	C	A
ENST00000264832.3	+	CTCGCTATGGC	19	10381832	rs36086415	C	A
ENST00000393708.3	-	CATGTCATGGC	19	10426678	rs369997351	G	A
ENST00000539243.2	+	AGCGCCATGAG	19	1066022	rs147064427	G	A
ENST00000215587.7	-	GCTGCCATGGA	19	1095318	rs538071326	A	G
ENST00000354171.8	+	GCCGCGATGAG	19	1104047	rs8178967	G	A
ENST00000354882.5	-	TGCAAGATGGA	19	11456296	rs555973804	C	T
ENST00000393423.3	-	CCGGCCATGGA	19	11529958	rs1549168	C	T
ENST00000252456.2	+	GCCAGCATGTC	19	11649741	rs138283881	G	A
ENST00000304030.2	+	CCCCCAATGCT	19	11976972	rs139088719	A	G
ENST00000254321.4	+	TGCGCTATGCC	19	12036021	rs8105892	G	A
ENST00000538752.1	+	TGCGCTATGCC	19	12036021	rs8105892	G	A
ENST00000382477.2	-	GCCACCATGGC	19	1236080	rs113298601	A	G
ENST00000222219.3	-	GCAGCTATGAT	19	12992195	rs201202740	C	G
ENST00000316448.5	+	CCCGCCATGCT	19	13049490	rs190251647	C	T
ENST00000454313.1	-	GATAAAATGAC	19	14015711	rs6511898	C	A
ENST00000339560.5	-	GGCGAGATGGC	19	14049013	rs138678978	C	T
ENST00000548523.1	-	CCTACCATGGC	19	14196445	rs60833253	G	A
ENST00000254322.2	-	GGGGTCATGGG	19	14629162	rs114733595	G	A
ENST00000269878.4	-	CACACCATGGG	19	16284288	rs78608985	G	T
ENST00000247706.3	-	CACACCATGCT	19	17412426	rs145834574	G	A
ENST00000430026.2	-	GATCCGATGGA	19	18197635	rs436857	G	A
ENST00000407280.2	+	GCTGCGATGAC	19	18284651	rs2241089	G	T
ENST00000392336.3	+	AAATAAATGAG	19	19145021	rs140269567	G	A
ENST00000251203.6	-	CCGCTCATGGC	19	19729443	rs112396932	G	C
ENST00000300961.5	-	CCAGCCATGTC	19	2255311	rs7250822	C	G
ENST00000300961.5	-	CCAGCCATGTC	19	2255317	rs539170190	T	C
ENST00000215570.3	-	GGAGCCATGGA	19	2427533	rs573425825	G	A
ENST00000262643.3	+	CCCATCATGCC	19	30303458	rs535522927	C	T
ENST00000254260.3	-	GCTAGCATGAC	19	33555760	rs550390815	C	T
ENST00000170564.2	+	AGCAGGATGGC	19	33572104	rs535591203	C	A
ENST00000246535.2	+	GCGGCCATGGC	19	34895337	rs185898814	T	C
ENST00000375190.4	-	GGAGCCATGTG	19	3600638	rs184230004	C	T
ENST00000342640.3	-	CGGTGTATGGG	19	375976	rs368042622	G	A
ENST00000330133.4	+	TACGTCATGGC	19	3762698	rs13960	C	T
ENST00000355202.3	-	CAAACCATGTC	19	38202516	rs2909097	A	C
ENST00000355202.3	-	CAAACCATGTC	19	38202523	rs143661980	T	C
ENST00000252530.5	+	ACTTTCATGGA	19	38893792	rs200159503	T	C
ENST00000454404.2	-	GGAAGCATGAA	19	38916736	rs35136248	C	G
ENST00000221418.4	-	GCGGCGATGGC	19	39322414	rs117820732	G	T
ENST00000291842.5	+	GGGGCCATGGC	19	41082803	rs577265984	G	A
ENST00000378313.2	-	CCCAAAATGAC	19	41255705	rs77405258	T	C
ENST00000199764.6	+	GAGACCATGGG	19	42259544	rs184076382	A	G
ENST00000222008.6	-	GCAGACATGGC	19	42463447	rs735571	C	T
ENST00000222008.6	-	GCAGACATGGC	19	42463449	rs200458767	G	C
ENST00000320078.7	-	GAGATCATGGG	19	43530526	rs1064914	A	G
ENST00000262887.5	-	GTTGACATGCC	19	44079611	rs2307187	G	A
ENST00000300811.3	-	CCGGTCATGAC	19	44118461	rs113768858	G	A
ENST00000377950.3	-	TCAGCAATGGC	19	44306531	rs181817601	A	C
ENST00000407951.2	+	TTGGTCATGAT	19	44494215	rs381983	T	C
ENST00000421176.3	+	GGAAAAATGAC	19	44580539	rs147965916	A	C
ENST00000336976.6	+	GGGAAAATGAC	19	44602030	rs193238470	A	G
ENST00000425690.3	+	ACTGGCATGGC	19	45147396	rs11540085	C	T
ENST00000252490.4	+	GACACTATGGG	19	45451734	rs5121	C	T
ENST00000245925.3	-	GCCGCCATGAG	19	46142638	rs567066656	G	C
ENST00000263281.3	+	CTCACGATGAC	19	46172777	rs5390	C	G
ENST00000291270.4	-	TCCAACATGTC	19	46285614	rs199927858	G	A
ENST00000377697.1	-	TAACCCATGGT	19	46544221	rs201920109	G	A
ENST00000414155.1	-	TGGCCCATGGC	19	47104226	rs117306460	T	C
ENST00000344839.3	-	CTGCCCATGGG	19	48495337	rs138008291	A	T
ENST00000344839.3	-	CTGCCCATGGG	19	48495338	rs149510046	T	C
ENST00000519940.1	-	TGACAAATGGA	19	48744275	rs571765227	C	T
ENST00000221403.2	+	GCAACCATGGC	19	49436980	rs61742557	T	A
ENST00000221403.2	+	GCAACCATGGC	19	49436982	rs10401800	G	C
ENST00000576655.1	+	AGAGCTATGAA	19	49929683	rs111654240	G	C
ENST00000253727.5	+	CCCACCATGTC	19	50880867	rs41379547	C	T
ENST00000334976.6	+	GCCGAGATGGC	19	50979798	rs201542780	C	G
ENST00000391812.1	-	AAGGGCATGAC	19	51301706	rs141636848	G	A
ENST00000453757.3	-	CAGGCCATGAG	19	51528890	rs2288892	C	T
ENST00000156476.2	-	GGAGCCATGTG	19	51568324	rs200831212	T	A
ENST00000356298.5	-	GCGGAGATGCT	19	51920839	rs573867424	C	T
ENST00000422689.2	+	ACGGTCATGCT	19	52873218	rs140336647	C	T
ENST00000338230.3	-	AAACGCATGAT	19	53271005	rs7252818	T	C
ENST00000500065.4	-	CCAGACATGGA	19	53625677	rs10414845	G	A
ENST00000264553.2	+	AGCGGCATGGA	19	544068	rs148492637	C	A
ENST00000302907.4	+	GCCAACATGCC	19	54705049	rs373642511	C	G
ENST00000450632.1	-	GACGCCATGAC	19	54761058	rs147711409	G	A
ENST00000333834.4	-	GCATCCATGGG	19	54974774	rs1981829	A	T
ENST00000301202.2	+	GGGGCCATGTC	19	55014133	rs373693421	C	T
ENST00000251372.3	+	GACGCTATGAC	19	55105706	rs117371487	C	T
ENST00000251372.3	+	GACGCTATGAC	19	55105709	rs140051438	T	C
ENST00000370205.4	-	CTCTGCATGGT	1	95538460	rs138104607	G	C
ENST00000415061.3	-	CCCGGCATGAG	19	55574403	rs1654455	C	G
ENST00000326652.4	-	CCCGGCATGTG	19	55832407	rs367758735	C	T
ENST00000326652.4	-	CCCGGCATGTG	19	55832410	rs201889004	G	T
ENST00000205194.4	+	GTTGCCATGGC	19	55997074	rs182684332	C	T
ENST00000332836.2	-	GGCGATATGGC	19	56249744	rs141752595	G	A
ENST00000333511.3	+	GGAATCATGGC	19	572632	rs14173	A	G
ENST00000321545.4	+	CTCAGGATGGC	19	57832219	rs113498250	A	G
ENST00000443917.2	+	CTTCTCATGGC	19	57863028	rs202157260	T	C
ENST00000309061.6	-	GCGCCGATGGC	19	5791154	rs149068354	G	A
ENST00000282292.4	+	GCTCCGATGGC	19	58011447	rs138317120	C	T
ENST00000299871.5	+	ATAGCGATGCT	19	58144715	rs9749449	A	G
ENST00000550135.1	+	CGCAGAATGCA	19	58513477	rs4801242	G	A
ENST00000439855.2	+	CAGGGCATGAC	19	58571371	rs151276756	A	T
ENST00000245816.4	+	GGAGGGATGTG	19	6361581	rs75589928	G	A
ENST00000312053.4	+	AGCATAATGCG	19	6887624	rs34176643	G	T
ENST00000381394.4	-	ACGGCTATGGG	19	7040159	rs200665606	C	T
ENST00000358368.4	-	AGAAAAATGGT	19	7694417	rs149669681	T	A
ENST00000390669.3	+	TGCAGCATGAA	19	8117938	rs571194324	A	C
ENST00000301458.5	-	GACAGCATGAG	19	8373176	rs2232773	C	T
ENST00000423345.4	-	CATCCCATGGC	19	8567475	rs968502	T	C
ENST00000397910.4	-	CTGTCCATGCT	19	9091816	rs528450017	G	A
ENST00000246081.2	+	AGGAAGATGGC	20	16729048	rs17686437	T	C
ENST00000334391.4	-	GTAAATATGAA	20	170263	rs145944118	A	T
ENST00000377428.2	+	AGGAAGATGTG	20	18794463	rs41308631	T	A
ENST00000377009.3	-	TGAAGGATGAT	20	23433454	rs60224170	A	G
ENST00000202625.2	+	CTTCACATGGC	20	2361613	rs80329336	A	G
ENST00000278765.4	-	CGCGACATGAC	20	23967252	rs148565423	G	A
ENST00000278772.4	-	GGCGCCATGAT	20	2474545	rs117256574	G	A
ENST00000461548.1	-	GGCGCCATGAT	20	2474545	rs117256574	G	A
ENST00000480798.1	+	GCAGCCATGCG	20	24930137	rs147172253	C	T
ENST00000480798.1	+	GCAGCCATGCG	20	24930146	rs35525649	G	A
ENST00000304788.3	-	GGCGCTATGGG	20	25604586	rs142974033	G	C
ENST00000376112.3	+	AGAATCATGAA	20	30193194	rs567214145	A	G
ENST00000375994.2	+	TACCTCATGGC	20	30407387	rs117502839	G	A
ENST00000202017.4	-	GGCGCTATGCT	20	30539766	rs138778824	G	A
ENST00000170150.3	+	GCAGCCATGGC	20	31596380	rs139467510	C	T
ENST00000253362.2	+	CAAAAGATGCT	20	31756954	rs17124277	G	A
ENST00000346416.2	-	AGTGCCATGCA	20	31984875	rs199749497	C	G
ENST00000359606.3	+	GTAGAGATGGG	20	32188182	rs200236182	T	G
ENST00000252015.2	-	GGAGACATGGC	20	33680585	rs551358134	G	A
ENST00000252015.2	-	GGAGACATGGC	20	33680589	rs561048073	C	T
ENST00000357394.4	+	GTCCCCATGGA	20	34129842	rs200394220	T	A
ENST00000374273.3	+	GTCAGGATGCG	20	34203930	rs145849826	G	A
ENST00000373461.4	+	CGCACGATGGG	20	36531751	rs140613830	C	G
ENST00000373433.4	+	GCCACCATGTC	20	36662348	rs143295875	C	T
ENST00000373345.4	+	GGCCGAATGGA	20	37252022	rs78155085	G	A
ENST00000373345.4	+	GGCCGAATGGA	20	37252025	rs556938634	T	G
ENST00000399672.1	-	GCGTCCATGGC	20	3740752	rs200353959	G	A
ENST00000379756.3	-	ACGCCAATGGC	20	3761937	rs141413015	G	A
ENST00000379756.3	-	ACGCCAATGGC	20	3761938	rs191106776	C	A
ENST00000373313.2	-	TCAGCGATGGC	20	39317491	rs369936070	C	A
ENST00000373313.2	-	TCAGCGATGGC	20	39317495	rs202157976	G	C
ENST00000372910.3	-	CTTCGAATGGC	20	43093919	rs151093974	T	G
ENST00000372813.3	-	CACGGGATGGC	20	43588977	rs8113914	C	A
ENST00000217428.6	-	GGCACCATGCA	20	44144247	rs141764153	A	G
ENST00000217428.6	-	GGCACCATGCA	20	44144249	rs145507846	G	A
ENST00000372330.3	+	CTCACCATGAG	20	44637567	rs121434556	T	A
ENST00000372285.3	+	CTCGCTATGGT	20	44746982	rs1883832	T	C
ENST00000372227.1	-	CCACGAATGGG	20	44987149	rs200404783	T	C
ENST00000359930.4	-	AAGAAGATGGG	20	46386109	rs139716062	T	A
ENST00000305817.2	+	GACGCGATGAG	20	4705195	rs200611031	G	A
ENST00000361573.2	+	CGCAGGATGGG	20	48429462	rs76846045	G	T
ENST00000379279.2	-	CGTGTTATGAT	20	5090075	rs141394228	A	G
ENST00000343535.4	-	GTCAGCATGGC	20	56195349	rs45521631	C	T
ENST00000475243.1	+	AGGAACATGGC	20	56964513	rs559486744	A	G
ENST00000371015.1	+	GGGCCCATGGC	20	58180068	rs534600901	C	T
ENST00000331758.3	+	GCCACCATGTC	20	60718873	rs201211633	C	T
ENST00000217159.1	+	GCGGAGATGCC	20	61287803	rs79435960	G	A
ENST00000370501.3	+	CCCACCATGCG	20	61340558	rs6090405	C	T
ENST00000370179.3	+	TAAAGCATGGC	20	62152661	rs9246	C	T
ENST00000309546.3	+	CACAGGATGGG	20	62368900	rs183892851	A	G
ENST00000266077.2	+	CCGGCCATGGA	20	62371263	rs554986541	G	A
ENST00000246024.2	-	CCCAACATGGC	20	8000264	rs545054899	G	A
ENST00000376865.1	+	CTCACAATGAA	2	101086951	rs59029020	A	G
ENST00000376865.1	+	CTCACAATGAA	2	101086952	rs76201870	T	C
ENST00000405333.1	-	GAAATCATGAA	2	10585164	rs6738288	C	T
ENST00000371162.4	-	TTGAAAATGGA	2	111996086	rs114386852	T	C
ENST00000405022.3	+	TGCACCATGGG	2	11273459	rs190385156	C	T
ENST00000302558.3	-	GGCGCGATGAG	2	113191031	rs537555278	C	A
ENST00000327407.2	-	GACATCATGAA	2	113789291	rs534642666	T	C
ENST00000381486.2	+	TTGAAGATGGG	2	11696736	rs144351460	T	G
ENST00000424086.1	+	ACACTCATGGC	2	120438425	rs60512404	C	T
ENST00000361492.4	+	GCTGAGATGGA	2	121554896	rs369138377	G	C
ENST00000299340.4	-	GCTTGGATGGA	21	27945256	rs146452127	C	T
ENST00000333765.4	+	CAGGTGATGTT	21	30968674	rs200901904	G	T
ENST00000390690.2	-	GTCAACATGTC	21	31798227	rs369749357	A	T
ENST00000334055.3	-	GGTGGCATGTG	21	31859668	rs143538137	G	A
ENST00000382751.3	-	TCGGCCATGGG	21	33765217	rs546492368	C	G
ENST00000333337.3	+	GGGGCCATGGA	21	34399167	rs199942816	G	T
ENST00000300305.3	-	GAAGCGATGGC	21	36421198	rs375033964	G	A
ENST00000288319.7	-	CGCATTATGGC	21	39870310	rs2836441	G	A
ENST00000333229.2	-	CCGGCCATGGC	21	40685421	rs537665633	C	G
ENST00000380749.5	-	GCCACGATGCC	21	40720848	rs533386388	G	C
ENST00000333634.4	+	CCCAAGATGCC	21	40823836	rs143407181	G	A
ENST00000400449.1	-	TACACAATGCC	21	43315146	rs543641130	C	T
ENST00000518498.1	-	TGGACCATGAA	21	43735529	rs11701143	T	C
ENST00000291527.2	-	GAGGCAATGGC	21	43786606	rs2156310	G	A
ENST00000270162.6	-	GGAGCCATGGT	21	44846055	rs376640139	C	T
ENST00000398063.2	+	AGCGCCATGGG	21	45379560	rs148304388	G	A
ENST00000349048.4	+	GCCGCCATGGC	21	45719984	rs550375523	C	T
ENST00000400368.1	-	CCCAGCATGGC	21	46012371	rs73907038	G	A
ENST00000359759.4	+	GCCCCGATGGC	21	46875444	rs576327205	G	A
ENST00000361866.3	+	CCAGACATGAG	21	47401760	rs7671	C	G
ENST00000243347.3	+	GACGATATGAT	2	152214185	rs78598479	T	A
ENST00000314499.7	+	GCAGCGATGAG	2	166451575	rs73972107	G	A
ENST00000263816.3	-	GCGGAGATGGA	2	170218914	rs373286009	G	A
ENST00000342016.3	-	TCCAAGATGGG	2	175260355	rs719161	G	T
ENST00000408939.2	-	GTGGTTATGGC	2	178417497	rs192648738	C	A
ENST00000420890.2	-	AGTACCATGTC	2	179914670	rs373407057	G	T
ENST00000410053.3	-	CAGAAAATGAA	2	180858072	rs143368154	C	T
ENST00000359678.5	-	TTGGCGATGGG	2	191184475	rs291466	A	G
ENST00000409150.3	-	AACGAAATGGG	2	191399378	rs13412879	C	G
ENST00000536433.1	-	ACCGAAATGGG	2	19553570	rs45535040	G	C
ENST00000359963.3	-	CGGGCCATGGA	22	17073441	rs150667617	G	A
ENST00000400588.1	-	GCCCCCATGTC	22	17489005	rs189167407	G	A
ENST00000332710.4	+	GCAGGGATGCA	22	19747164	rs41298786	G	A
ENST00000215730.6	+	GGCACCATGTC	22	21213394	rs139884576	G	A
ENST00000263212.5	-	TTGGGCATGTC	22	22300426	rs575671165	A	G
ENST00000398793.2	-	GACAAAATGAA	22	22330082	rs239927	T	C
ENST00000390302.2	+	TCCACCATGGC	22	22930684	rs11914178	A	G
ENST00000390311.2	+	CTCACCATGGC	22	23089906	rs113625642	C	T
ENST00000390313.2	+	TCAGCCATGGC	22	23114327	rs6003299	T	C
ENST00000390318.2	+	CCAACCATGGC	22	23213722	rs557855992	C	A
ENST00000532223.1	+	AGGCCAATGAG	22	23230232	rs530857841	C	T
ENST00000543438.1	-	TGAGGGATGGA	22	24827522	rs7287959	C	T
ENST00000215939.2	-	GGAACCATGTC	22	27012289	rs200241940	C	T
ENST00000397938.2	+	GAGAAAATGGC	22	29664323	rs2231392	A	G
ENST00000336726.6	+	CCTACAATGGC	22	30489945	rs34150968	G	A
ENST00000403477.3	-	GCTGGGATGGC	22	30722873	rs370634113	C	T
ENST00000312932.8	+	GCCACGATGAG	22	30793103	rs561793604	A	G
ENST00000331075.5	+	GCAGACATGGA	22	31519003	rs533763656	G	T
ENST00000216106.5	+	ACCACCATGGC	22	35658379	rs148351517	C	T
ENST00000352371.1	-	AGCGACATGGA	22	36598081	rs6000181	A	T
ENST00000433985.2	-	GTTACCATGGT	22	37171757	rs117576168	C	T
ENST00000215909.5	+	TCAATCATGGC	22	38071707	rs12403	A	G
ENST00000216241.9	-	GGCGGCATGGA	22	41636888	rs374597173	C	T
ENST00000216252.3	-	GGAGCTATGGC	22	41864658	rs147057892	A	T
ENST00000263246.3	-	GAAAAAATGTC	22	43308084	rs200500178	C	A
ENST00000360835.3	-	TTGAGCATGGG	22	43739269	rs540589543	C	T
ENST00000542779.1	+	AGGTCCATGTG	22	43820989	rs532098264	T	G
ENST00000334566.5	+	GCAGAAATGTC	22	44965288	rs59866166	G	A
ENST00000313237.5	-	GCCGGGATGGA	22	45405433	rs149572735	C	T
ENST00000313237.5	-	GCCGGGATGGA	22	45405434	rs199787537	G	C
ENST00000444628.1	-	AGGCTTATGTG	22	50020539	rs113891019	A	G
ENST00000216271.5	-	GCAGCCATGGG	22	50689460	rs142968114	A	G
ENST00000360719.2	-	CCCAGGATGGC	22	51016347	rs373082174	T	A
ENST00000216139.5	+	AGGAGTATGGT	22	51176664	rs145373249	A	G
ENST00000403714.3	+	GCCGAGATGTA	2	25265181	rs571494856	G	A
ENST00000380320.4	+	CCCGCCATGGC	2	27301931	rs202187885	G	A
ENST00000306108.5	-	AACACTATGCT	2	29093143	rs139528725	T	C
ENST00000389048.3	-	GGCGGGATGGG	2	30143530	rs56270786	C	T
ENST00000315212.3	-	TGAGCGATGAG	2	3605851	rs149902197	C	G
ENST00000234170.5	-	CCCGCCATGGC	2	37458711	rs3213745	G	A
ENST00000234170.5	-	CCCGCCATGGC	2	37458713	rs557024343	C	T
ENST00000295324.3	-	TCCAAAATGCC	2	37873734	rs181184587	G	C
ENST00000263881.3	-	CCCGCCATGAA	2	39664129	rs146016225	G	C
ENST00000378711.2	-	TCACACATGGT	2	42180437	rs569340488	T	A
ENST00000378551.2	+	CTAAACATGGG	2	44428335	rs149328970	A	G
ENST00000378494.3	+	AGTGAGATGGA	2	44589146	rs150365075	G	A
ENST00000263734.3	+	GCGACAATGAC	2	46525047	rs535202677	G	A
ENST00000522587.1	-	GCAGCCATGGC	2	46739856	rs185014020	C	T
ENST00000309835.3	+	CCAAAGATGTG	2	48807772	rs149572071	G	C
ENST00000405008.1	+	CCAAAGATGTG	2	48807772	rs149572071	G	C
ENST00000317802.7	-	ACCAACATGAG	2	54483287	rs148872913	A	G
ENST00000317802.7	-	ACCAACATGAG	2	54483288	rs61736720	T	C
ENST00000349456.4	+	GGCGGGATGGC	2	55746933	rs200835926	G	T
ENST00000407823.3	-	GCCACCATGTC	2	55844423	rs552639856	G	A
ENST00000407092.2	+	AGGCCGATGGC	2	66662986	rs531339968	C	A
ENST00000355848.3	-	GCCATAATGGC	2	68274445	rs200292063	T	C
ENST00000295379.1	-	GGAGTCATGGG	2	69098495	rs138364801	C	T
ENST00000295379.1	-	GGAGTCATGGG	2	69098496	rs2231338	C	T
ENST00000410022.2	-	ACTAAGATGGC	2	69664560	rs116604978	T	C
ENST00000037869.3	-	GTCGCCATGGC	2	70529145	rs201738687	G	A
ENST00000264436.3	-	GGGAAAATGAG	2	70933542	rs62642474	T	C
ENST00000234396.4	+	TGCTCCATGGC	2	71163086	rs11681642	T	C
ENST00000244221.8	-	ATCATAATGAA	2	71429725	rs56871884	T	C
ENST00000401851.1	+	CACAAGATGTC	2	74361813	rs59380159	G	A
ENST00000394053.2	+	CGGTCTATGGC	2	74425769	rs199529089	A	G
ENST00000233630.6	-	TTTAAGATGGC	2	74734800	rs117835471	A	C
ENST00000357877.2	+	CCAAAGATGCC	2	74881507	rs548611125	C	T
ENST00000305249.4	-	TTCGAAATGGA	2	75426066	rs199714978	A	C
ENST00000409724.1	-	GACAGCATGTA	2	85629266	rs62623452	C	T
ENST00000254630.7	+	TCAAAGATGGC	2	86333375	rs13393659	C	T
ENST00000409310.2	-	CCCAAAATGGA	2	87248903	rs558829030	C	A
ENST00000495489.1	-	ATAGACATGAG	2	89292401	rs143871003	T	C
ENST00000490686.1	-	CACAGCATGGA	2	89417311	rs375995765	T	A
ENST00000390270.2	+	GGAACCATGGA	2	90077781	rs183765055	A	G
ENST00000471857.1	+	CACAGCATGGA	2	90259776	rs538313788	G	A
ENST00000447036.1	+	GCTCTGATGCT	2	96071310	rs147386324	C	G
ENST00000240423.4	+	GGAAAGATGGG	2	97001567	rs369670146	G	A
ENST00000461153.2	+	ACGATTATGGA	2	97779472	rs576769412	C	A
ENST00000338148.3	+	ACACTTATGGC	2	99802662	rs17022330	C	T
ENST00000512183.2	+	ACACTTATGGC	2	99802662	rs17022330	C	T
ENST00000471714.1	-	TTCCCCATGCG	3	100712249	rs3732895	T	C
ENST00000256458.4	+	CGTGCCATGGC	3	10206637	rs146076327	C	T
ENST00000397077.1	-	GCAAACATGGG	3	10491230	rs9826066	T	C
ENST00000264538.3	-	TCTGCGATGAC	3	107941167	rs112224477	C	A
ENST00000335658.6	-	GGAAGCATGTT	3	109056363	rs16855561	A	G
ENST00000264848.5	+	CGGCACATGGA	3	111805250	rs376310649	G	C
ENST00000484193.1	-	GAGAGGATGGG	3	111851971	rs202114131	C	T
ENST00000354449.3	+	GAAATAATGGC	3	11340168	rs73812426	T	C
ENST00000264234.3	+	CCGAAGATGGC	3	118905584	rs3796355	C	T
ENST00000350110.2	+	GTGGAAATGAG	3	1189697	rs147049142	G	A
ENST00000295588.4	+	CCGGCGATGGA	3	119187867	rs202050990	C	G
ENST00000316218.7	+	GCTGGGATGGC	3	122786011	rs375940914	G	A
ENST00000340333.3	-	GCAGCCATGGA	3	125652523	rs145626581	C	T
ENST00000487848.1	-	CCGGCCATGGA	3	128205879	rs374415484	G	C
ENST00000302649.3	+	GCCGCGATGCC	3	129694659	rs5657	G	A
ENST00000402696.3	+	CGGAAGATGAG	3	133465283	rs1130459	A	G
ENST00000232219.2	-	GCTACAATGGA	3	139258561	rs183138806	T	C
ENST00000295992.3	-	GCTGCCATGAG	3	142607735	rs202134327	T	G
ENST00000282903.5	-	CCGAATATGGG	3	145878780	rs79161810	C	T
ENST00000446574.2	-	TTCAAAATGTC	3	145939856	rs116331161	C	G
ENST00000443512.1	-	ATCTTCATGGC	3	146322998	rs201075188	A	G
ENST00000296046.3	+	AGAACCATGAG	3	148583094	rs537389511	C	A
ENST00000239940.7	-	TCGAAGATGGC	3	149688648	rs200164947	G	A
ENST00000239944.2	-	GCGAAGATGGT	3	150263928	rs200866187	C	T
ENST00000446603.2	+	GTACAGATGCA	3	153202348	rs3732619	G	A
ENST00000265044.2	-	TCCGCCATGGC	3	156272883	rs375015210	G	A
ENST00000320767.2	+	GCTGAAATGGG	3	160395139	rs146704564	G	T
ENST00000296015.4	+	CTAGCCATGGA	3	180320049	rs114124840	C	T
ENST00000465010.1	+	GTGGATATGAG	3	182987591	rs115825683	G	A
ENST00000317897.3	-	GAAAACATGTT	3	184429609	rs372006874	T	G
ENST00000296270.1	+	GGTTTAATGGC	3	185431219	rs80286766	G	A
ENST00000264734.2	+	CGGATAATGAC	3	190105906	rs200322099	A	T
ENST00000409690.3	-	CCGGACATGTA	3	196435539	rs147719730	A	G
ENST00000295754.5	+	TCTGCCATGGG	3	30648379	rs565502802	G	T
ENST00000328834.5	+	GGGAAGATGGC	3	32726952	rs182909795	G	A
ENST00000256509.2	+	AGAGCAATGGA	3	361456	rs78920232	A	G
ENST00000273183.3	+	GCCACGATGAT	3	36422135	rs112766131	G	A
ENST00000328376.5	+	ATCCACATGAA	3	37458758	rs113724034	A	C
ENST00000441172.1	-	GAGAAGATGAA	3	42448748	rs200997873	T	C
ENST00000396056.2	+	GAGAAGATGAC	3	44692564	rs2272044	C	G
ENST00000296121.4	-	GCTACCATGAG	3	44803100	rs112626673	C	G
ENST00000296129.1	-	GGAGTCATGGC	3	45187785	rs2276862	C	G
ENST00000296140.3	-	GCCGGGATGGA	3	46245807	rs41477748	C	T
ENST00000395905.3	-	CCCAAAATGGG	3	46593087	rs552828950	G	A
ENST00000463091.2	-	CTTGCCATGGC	3	46777881	rs6793535	C	G
ENST00000408959.2	-	CGGGTAATGCT	3	48956588	rs181008139	G	A
ENST00000273590.3	+	CCAGTCATGGC	3	49449859	rs115911627	C	A
ENST00000273590.3	+	CCAGTCATGGC	3	49449864	rs575217400	C	A
ENST00000273588.3	-	GCGACGATGCA	3	49459884	rs143841175	C	T
ENST00000256495.3	+	CGCGCCATGGA	3	5021403	rs2271566	C	T
ENST00000232501.3	-	ATTGCCATGGG	3	50388087	rs41291730	A	C
ENST00000446461.1	-	CTAACCATGGG	3	51909553	rs150191225	G	T
ENST00000478707.1	+	CACCGAATGAA	3	52446893	rs187460519	C	T
ENST00000321725.6	+	CCAGCCATGGC	3	52529428	rs560610713	C	G
ENST00000296292.3	-	GAGGCTATGGG	3	53164420	rs369525015	C	T
ENST00000335754.3	-	GCCATAATGAC	3	53916130	rs2276845	A	G
ENST00000394549.2	-	GCCAGGATGTC	3	58196639	rs2292677	C	T
ENST00000295619.3	-	GGCGCCATGAG	3	71834207	rs552496938	G	T
ENST00000343849.2	+	TCTGCGATGAT	3	8775562	rs74377241	G	A
ENST00000452837.2	+	GCCAACATGTG	3	9406748	rs140751334	C	T
ENST00000307768.4	+	GGCACAATGGC	3	9932407	rs143438463	A	G
ENST00000394144.4	+	ACAGCAATGGC	3	99979860	rs200968095	G	A
ENST00000209668.2	-	ATCAACATGAG	4	100212072	rs545664970	G	A
ENST00000265174.4	-	GCGGTCATGGA	4	108641339	rs201199394	C	T
ENST00000265165.1	-	GCCGGGATGCC	4	109088926	rs190386439	C	G
ENST00000310754.4	-	GCCACCATGGG	4	118006552	rs113513862	T	C
ENST00000296499.5	+	TACAACATGAG	4	118975065	rs151249234	C	G
ENST00000281154.4	+	TCCATCATGCA	4	128651703	rs141499993	G	T
ENST00000270861.5	+	GGAAATATGGC	4	128802286	rs200812457	A	G
ENST00000283131.3	+	AACATCATGTC	4	144435074	rs377295689	C	T
ENST00000422728.2	+	ATTAAAATGGA	4	15688604	rs2302469	G	C
ENST00000511399.1	-	ATCCGGATGAA	4	157563477	rs193292980	G	A
ENST00000259989.6	-	ATCGCCATGAA	4	15964755	rs369019614	C	A
ENST00000513876.2	+	CAGTGGATGGA	4	165878170	rs3733419	A	G
ENST00000281453.5	-	GGCACCATGGC	4	185655214	rs193135363	C	T
ENST00000536972.1	-	ACCAGGATGTC	4	189026524	rs13139393	C	G
ENST00000226798.4	+	GGAGCCATGGC	4	190862164	rs372297244	C	T
ENST00000303965.4	-	ACCATTATGTC	4	36231111	rs137867207	T	C
ENST00000261434.3	+	GAGGAAATGTC	4	39460737	rs139360916	A	G
ENST00000381799.4	+	GGGAAGATGCT	4	40245006	rs146170789	G	A
ENST00000306200.2	-	GTCGCTATGGC	4	4543693	rs140699380	G	C
ENST00000511833.2	-	GATGTGATGTT	4	466394	rs368780921	A	G
ENST00000226432.4	+	GCGGCGATGCC	4	48988450	rs3747690	C	A
ENST00000307746.4	-	GGCACCATGAG	4	5021178	rs200321003	C	T
ENST00000343457.3	-	GGCATTATGAA	4	52883776	rs544336958	T	C
ENST00000401642.3	-	CCAACCATGAG	4	54232110	rs1351514	G	A
ENST00000263923.4	-	TGCAGGATGCA	4	55991461	rs56233104	C	A
ENST00000381295.2	+	GAAAAGATGAC	4	56724489	rs142041450	G	C
ENST00000257287.3	+	GACGAGATGAC	4	56818300	rs73155549	A	G
ENST00000322244.4	-	GCGGCAATGGA	4	68566838	rs112972338	T	C
ENST00000334830.7	-	CTGTACATGAT	4	68829109	rs977728	C	T
ENST00000265403.7	+	ACAAGGATGGC	4	69681741	rs115244875	G	A
ENST00000305231.7	+	ACCAGGATGTC	4	69962237	rs111878373	G	A
ENST00000305107.6	-	ATCAGGATGTC	4	70361577	rs185779213	C	T
ENST00000396094.2	+	ACGAAAATGAA	4	71062256	rs3756132	C	T
ENST00000254799.6	-	GAGTCCATGGC	4	71705545	rs193090549	G	A
ENST00000307407.3	+	GTAAACATGAC	4	74606375	rs2227538	C	T
ENST00000395748.3	+	GGACCAATGAG	4	75311058	rs545611903	G	A
ENST00000324439.5	-	GAGGAGATGGC	4	76439497	rs146666606	C	T
ENST00000286719.7	-	TAAACTATGGG	4	76817481	rs554918974	T	A
ENST00000536314.1	+	AAGAAGATGAC	4	83821951	rs199955122	A	C
ENST00000504213.1	-	CTACAAATGCT	4	93221990	rs143831240	G	A
ENST00000295268.3	-	AGCACTATGTA	4	99064305	rs573002393	G	C
ENST00000310954.6	-	CCAGACATGAA	5	101631965	rs149431208	A	G
ENST00000304400.7	+	GTGGACATGGC	5	102201895	rs201038016	T	C
ENST00000230895.6	-	CGCGTCATGTC	5	10761182	rs267927	A	G
ENST00000261486.5	-	ACCGACATGGG	5	111754737	rs7711853	G	A
ENST00000427199.2	-	TTTATAATGGG	5	114916953	rs545780816	T	C
ENST00000357872.4	+	CCTGCCATGGG	5	115298311	rs201363777	T	C
ENST00000304460.10	+	ACCACCATGGT	5	1201769	rs367576369	G	T
ENST00000262462.4	+	GCCCCCATGCT	5	128301826	rs568859679	C	A
ENST00000297156.2	+	GGGAGGATGGA	5	134074307	rs181306113	G	C
ENST00000265195.5	-	CTGACTATGGC	5	138463538	rs11555154	G	C
ENST00000333305.3	+	TTAAATATGTG	5	139508064	rs141663065	G	A
ENST00000261811.4	+	TCCCCGATGAA	5	139574050	rs11538394	G	A
ENST00000261813.4	-	ACCAAGATGGC	5	139682663	rs148301200	G	C
ENST00000529310.1	+	TTTGACATGGT	5	140207681	rs150637034	T	C
ENST00000284268.6	-	GGGACTATGGT	5	14871560	rs78431233	C	T
ENST00000524142.1	-	TCAGTCATGCC	5	151138115	rs544479788	C	T
ENST00000425854.1	-	CCCATAATGCA	5	156484958	rs191484308	G	A
ENST00000409999.3	+	GCCGCAATGAC	5	157098620	rs115310940	G	A
ENST00000297151.4	-	ATAACCATGTC	5	159842303	rs139074197	G	T
ENST00000513610.1	-	GGAACAATGGA	5	16935923	rs142469364	C	G
ENST00000524175.1	+	GATTGTATGAG	5	171200831	rs28431215	G	C
ENST00000393792.2	-	GCCCCCATGGG	5	171710675	rs549097448	C	A
ENST00000408923.3	+	AGCGGCATGCC	5	176785022	rs370972111	C	T
ENST00000253496.3	-	GATGCCATGAG	5	176836532	rs1801020	A	G
ENST00000511856.1	+	CTCACAATGGG	5	177457592	rs532058602	C	A
ENST00000320129.3	+	GAAAGAATGGC	5	178369788	rs117923336	A	T
ENST00000292586.6	-	GCAGGGATGGC	5	179285801	rs529654562	G	A
ENST00000264932.6	+	GCAGACATGTC	5	218467	rs377134185	A	G
ENST00000325366.9	+	AAAAACATGAG	5	31532498	rs147350132	A	G
ENST00000265112.3	+	TCGCCAATGTT	5	33441193	rs16891129	A	G
ENST00000231498.3	-	TCCGAGATGCC	5	37371082	rs564198119	C	T
ENST00000381778.3	-	ACGCATATGCA	5	38821543	rs553945052	G	A
ENST00000357387.3	-	GTCAATATGGC	5	39074485	rs371875489	C	T
ENST00000314890.3	-	TGAGGGATGGA	5	43040151	rs181725010	C	A
ENST00000302005.1	+	TTCACTATGGC	5	53751620	rs368634232	A	G
ENST00000285947.2	+	GCAGCCATGCC	5	56205469	rs28377617	A	T
ENST00000504333.1	-	AGACGGATGAT	5	57854038	rs541921818	C	A
ENST00000504333.1	-	AGACGGATGAT	5	57854039	rs566907915	G	A
ENST00000389074.5	+	CCCGCGATGAG	5	63986449	rs28582519	C	A
ENST00000302351.4	-	AACAAAATGTC	5	73932315	rs9176	T	C
ENST00000502798.2	+	GATAAGATGGA	5	75427573	rs568600852	A	G
ENST00000296677.4	+	AGGAGGATGCG	5	76115011	rs61749608	C	A
ENST00000369110.3	-	CCGGCCATGCT	6	105850763	rs148038004	G	A
ENST00000376935.3	+	CCCAAGATGTG	6	11094543	rs566006460	C	G
ENST00000329970.7	+	GGGACCATGGC	6	111279971	rs536750956	C	T
ENST00000368662.5	-	ACCACCATGAC	6	112408639	rs147330886	G	C
ENST00000368635.4	+	GCCAGCATGGG	6	114178920	rs45564039	G	A
ENST00000319550.3	+	GCAGCCATGGC	6	116422098	rs148112050	C	T
ENST00000368557.4	-	GGCAGCATGCT	6	117086743	rs116527308	G	T
ENST00000379250.4	+	ACCCTGATGCG	6	13584347	rs150779718	G	A
ENST00000379170.3	-	TCGGGGATGGA	6	13814664	rs527394696	C	T
ENST00000367591.4	+	CTAAAGATGCT	6	143772176	rs116692495	A	G
ENST00000397944.3	+	TCTGCCATGGC	6	146920175	rs190606176	C	T
ENST00000326669.4	+	TTCACCATGGC	6	149721528	rs78701690	A	G
ENST00000357183.4	-	CACAGTATGCG	6	150212034	rs61746769	G	A
ENST00000286380.2	-	TCCCCAATGGC	6	150346607	rs141551402	T	C
ENST00000361131.4	+	GGGGACATGTC	6	150464326	rs557432817	G	C
ENST00000325144.4	-	TAAAAAATGGA	6	151694778	rs146715539	A	T
ENST00000392167.3	+	ACGGCCATGGA	6	160221338	rs148594392	C	A
ENST00000320285.4	-	CGCATCATGGA	6	161653246	rs80142589	G	T
ENST00000361731.3	-	AGGGCCATGGA	6	166755975	rs10862	T	C
ENST00000366834.1	-	CGGGTGATGCC	6	167571324	rs200659009	C	T
ENST00000515138.1	+	CGCCCAATGAG	6	167738657	rs367589735	G	A
ENST00000495520.1	-	GGGCTGATGGG	6	168191762	rs111463014	C	T
ENST00000366773.3	+	GAAGTTATGGA	6	170151758	rs200330797	A	T
ENST00000262193.6	-	CGTGCGATGTT	6	170862336	rs10946279	G	A
ENST00000259963.3	+	GCGACGATGGC	6	17600639	rs550637737	C	G
ENST00000324607.7	-	TGCAGGATGGC	6	20212469	rs12194843	G	A
ENST00000306482.1	-	ACGAACATGAA	6	22297216	rs138307831	G	A
ENST00000230036.1	-	GAGATCATGTC	6	24489741	rs2076316	A	C
ENST00000244527.4	-	CCGTGTATGCA	6	25830790	rs72542429	G	A
ENST00000377803.2	+	GGAATCATGTC	6	26104171	rs200049708	G	A
ENST00000360441.4	+	TTGGTCATGTC	6	26204873	rs184503150	A	G
ENST00000296847.3	-	TCCCTGATGAT	6	2624053	rs17135340	T	A
ENST00000377745.2	+	TCGATCATGTC	6	26240649	rs3734534	C	T
ENST00000377745.2	+	TCGATCATGTC	6	26240650	rs185762769	G	A
ENST00000377745.2	+	TCGATCATGTC	6	26240653	rs117395344	C	T
ENST00000377459.1	+	ACCAGTATGTC	6	27114910	rs36043209	G	A
ENST00000380773.4	+	GCCGCCATGGA	6	2765854	rs542386561	G	A
ENST00000358739.3	+	TTTGCCATGTC	6	27775986	rs113996887	C	T
ENST00000358739.3	+	TTTGCCATGTC	6	27775987	rs148784606	C	T
ENST00000369163.2	+	GAAGGCATGGC	6	27777849	rs538423058	G	A
ENST00000333151.3	-	TTTGCCATGTC	6	27782519	rs41269269	G	A
ENST00000355057.1	+	CTCGTCATGTC	6	27791900	rs145161016	G	A
ENST00000357320.2	+	TTCGTCATGTC	6	27833137	rs201871635	C	T
ENST00000331442.3	-	GCCACCATGTC	6	27835311	rs571707542	G	A
ENST00000343684.3	+	CGGCTCATGCC	6	28227145	rs41269289	G	C
ENST00000361902.1	-	CTAGCCATGTT	6	28483521	rs138819577	G	A
ENST00000452236.2	-	CTCGGGATGGA	6	28554496	rs529912000	C	T
ENST00000377160.2	+	GAGACTATGGT	6	29274464	rs147772712	A	G
ENST00000377147.2	-	ATCGACATGGA	6	29395421	rs371126300	C	T
ENST00000383640.2	+	CAGGCCATGGT	6	29555720	rs144017654	C	T
ENST00000376809.5	+	CCGAGGATGGC	6	29910330	rs112877416	G	A
ENST00000376734.3	-	TCTGTCATGGC	6	30080582	rs17187910	T	C
ENST00000437089.1	-	GATACCATGGC	6	30166886	rs2523720	C	T
ENST00000442966.2	+	GCGGTGATGGC	6	30312945	rs371403510	G	A
ENST00000376511.2	-	ACCATCATGGG	6	30577724	rs2239513	T	C
ENST00000259874.5	-	CTCACCATGTG	6	30712297	rs544484209	G	C
ENST00000259874.5	-	CTCACCATGTG	6	30712298	rs9468821	T	C
ENST00000376288.2	-	TCCGAGATGGG	6	31088202	rs2302399	A	G
ENST00000376288.2	-	TCCGAGATGGG	6	31088202	rs568115239	A	G
ENST00000412585.2	-	GCCGAGATGCT	6	31324938	rs114811870	C	T
ENST00000412585.2	-	GCCGAGATGCT	6	31324939	rs190427310	G	C
ENST00000412585.2	-	GCCGAGATGCT	6	31324941	rs114038515	C	T
ENST00000252229.6	+	GGGGCCATGGG	6	31465968	rs544705247	G	A
ENST00000376191.2	+	CCCGCCATGGT	6	31496791	rs2516480	C	G
ENST00000404765.2	-	TCGGCCATGGA	6	31619542	rs138595299	G	A
ENST00000375819.2	-	CTCGCCATGAA	6	31689459	rs183618568	C	T
ENST00000418967.2	+	CTCGCCATGCT	6	32006196	rs543417478	C	T
ENST00000375203.3	-	GGAAAGATGGC	6	32095988	rs573575412	T	C
ENST00000395364.1	+	AAGAGGATGAT	6	32605234	rs28383345	G	A
ENST00000374943.4	-	TCAGTTATGTC	6	32634387	rs1049055	C	T
ENST00000437316.2	-	TGGAAGATGGC	6	32731252	rs79638337	C	T
ENST00000229829.5	-	AGTGTAATGGC	6	32977315	rs403414	A	G
ENST00000419277.1	-	CACAACATGCG	6	33041346	rs141591050	A	G
ENST00000419277.1	-	CACAACATGCG	6	33041349	rs148896979	T	C
ENST00000419277.1	-	CACAACATGCG	6	33041353	rs142724682	G	A
ENST00000374662.3	+	CCCGCCATGGC	6	33172442	rs150495100	C	T
ENST00000538487.1	-	TCCGAGATGCC	6	34101277	rs77939098	G	A
ENST00000374037.3	-	AGCGGCATGGG	6	34512236	rs111242802	G	T
ENST00000259938.2	-	CTCACCATGGA	6	35765068	rs3748050	T	C
ENST00000357641.6	+	GGTGCCATGAG	6	36168098	rs540433573	C	T
ENST00000448827.2	+	GCTGGAATGGC	6	41196169	rs112680060	G	T
ENST00000265350.4	-	GACGCCATGGG	6	41888762	rs183725849	C	A
ENST00000372963.1	+	CCTCACATGTG	6	42123316	rs572342270	C	T
ENST00000372963.1	+	CCTCACATGTG	6	42123317	rs1132156	A	C
ENST00000244625.2	-	GCCAATATGGA	6	42713809	rs146971710	C	T
ENST00000244625.2	-	GCCAATATGGA	6	42713810	rs148125708	A	C
ENST00000408925.2	-	CCCGACATGGA	6	42858524	rs61732354	C	T
ENST00000259750.4	+	TGGCGGATGCA	6	43214397	rs566878036	G	A
ENST00000372389.3	+	TTGAAGATGGC	6	43484844	rs2231756	G	A
ENST00000275016.2	-	AAAAACATGGA	6	46620325	rs201244643	T	C
ENST00000328908.5	+	AATTTTATGAC	6	4716016	rs3812179	A	G
ENST00000371211.2	+	AACAGAATGGC	6	47749806	rs568177905	G	A
ENST00000339139.4	-	CCAGCAATGGC	6	49676910	rs73439862	T	C
ENST00000304801.3	-	GTCAAGATGTC	6	49754902	rs574049850	T	C
ENST00000304801.3	-	GTCAAGATGTC	6	49754905	rs371435495	A	G
ENST00000360726.3	+	GCTGCCATGAC	6	52268008	rs3748066	T	G
ENST00000340465.2	+	TCCAGCATGAT	6	55192351	rs138536707	G	T
ENST00000370830.3	-	ACAAAAATGCA	6	55739660	rs9475437	G	A
ENST00000535941.1	-	AGAAACATGGC	6	56047422	rs114510213	T	C
ENST00000379953.1	+	CCCACCATGAA	6	6588966	rs142081955	C	T
ENST00000342415.4	+	GCAGCTATGGA	6	7590487	rs371222790	A	G
ENST00000379757.4	-	GCCGCGATGCC	6	7911011	rs187879976	G	C
ENST00000369940.1	+	ATCGCTATGTC	6	79577290	rs375964672	C	G
ENST00000257776.4	+	TCGGAGATGTC	6	84765033	rs147611875	C	T
ENST00000369663.4	-	GGGGGGATGGC	6	85473900	rs529461139	C	T
ENST00000257789.4	+	AAGACCATGGC	6	88299885	rs2307368	C	G
ENST00000549890.1	-	GAGGTTATGAA	6	88854998	rs376127620	T	A
ENST00000316149.7	-	GAGGAGATGGG	6	97345677	rs558262843	T	C
ENST00000460363.1	-	GAGAACATGGA	6	9939538	rs111809457	T	C
ENST00000254759.3	-	GTCGCGATGTG	6	99842056	rs9376137	C	A
ENST00000300181.2	-	GGGACCATGAG	7	100075667	rs200896384	C	T
ENST00000160382.5	-	GGCACTATGAG	7	100253983	rs141953498	C	T
ENST00000200457.4	+	CAGGCCATGTC	7	100465118	rs11539289	C	T
ENST00000305105.2	+	GTGCCAATGGT	7	100861475	rs10215517	C	T
ENST00000305105.2	+	GTGCCAATGGT	7	100861476	rs58033606	A	G
ENST00000542731.1	+	TCAAGTATGCA	7	105603760	rs372965602	C	A
ENST00000011473.2	-	CGCAGTATGGC	7	105752980	rs200891171	C	A
ENST00000440650.2	+	TAGGGCATGGA	7	106508003	rs373674616	G	A
ENST00000297135.3	-	GGAGCCATGGG	7	107204440	rs55840928	C	T
ENST00000415914.2	-	CGAGTCATGCC	7	108210019	rs2233131	G	C
ENST00000361822.3	+	CGGGTAATGGC	7	111846769	rs188977663	G	A
ENST00000393376.1	-	GTCAAGATGCT	7	121773782	rs279702	T	C
ENST00000340112.2	-	AGAGAGATGCA	7	122338970	rs71574716	C	T
ENST00000355749.2	-	GCTGTCATGGC	7	123197855	rs111742519	C	T
ENST00000476325.1	+	CTTACCATGAA	7	123508328	rs12672205	A	G
ENST00000480462.1	+	GAACCAATGAG	7	128312450	rs11769769	C	T
ENST00000355621.3	-	GACACCATGTC	7	129592396	rs116587081	G	A
ENST00000335420.4	+	CGGGTCATGTC	7	129710488	rs3734928	C	T
ENST00000011292.3	+	AGCAGCATGCG	7	130020361	rs558570962	C	G
ENST00000223208.4	-	GAAAATATGTC	7	130080812	rs2287371	T	G
ENST00000285968.6	+	TCTAAGATGGC	7	135242688	rs80096124	C	T
ENST00000445907.2	+	CGCAAAATGAA	7	136699608	rs531953729	G	A
ENST00000354926.4	+	GCCGCCATGTC	7	139045004	rs547352670	C	T
ENST00000288602.6	-	TATAAGATGGC	7	140624508	rs71645936	T	C
ENST00000390374.3	-	CCTGCCATGGG	7	142139773	rs361372	C	T
ENST00000390368.2	-	TCTGCCATGAG	7	142180956	rs361423	A	G
ENST00000418316.1	+	TGGATCATGGC	7	142749439	rs80058368	T	C
ENST00000291009.3	+	TCCAGCATGCG	7	142829206	rs189320012	C	T
ENST00000408906.2	+	AAGGGCATGAC	7	143747497	rs77440366	G	A
ENST00000408898.2	+	AGGGAAATGGG	7	143771317	rs144442261	G	C
ENST00000307003.2	+	GCCAAAATGCA	7	148288020	rs62624492	G	T
ENST00000335870.2	+	GGAGCCATGGC	7	148936869	rs371358218	C	T
ENST00000461940.1	+	GCGACAATGGC	7	150266985	rs147631155	C	T
ENST00000262187.5	-	GCCAAGATGCC	7	151216598	rs142774083	C	A
ENST00000406197.1	-	GAGCGAATGAA	7	155301736	rs116523217	C	T
ENST00000403150.1	+	CGGGTTATGAC	7	1578824	rs541149262	G	A
ENST00000402221.1	+	ACTGTGATGAT	7	1878377	rs3889573	A	G
ENST00000242257.8	-	ACACCAATGGC	7	2281808	rs548804514	T	C
ENST00000409409.1	-	TTAAATATGGG	7	25163744	rs11267038	A	C
ENST00000056233.3	+	GCGGCGATGAA	7	26192118	rs374410752	G	A
ENST00000258796.7	+	CCCGCCATGGC	7	2671786	rs369202126	C	T
ENST00000470747.4	-	TCGGAAATGTG	7	27219278	rs73290345	C	T
ENST00000403226.1	-	CAGAGGATGTC	7	3197867	rs4634530	T	C
ENST00000404826.2	+	CTCGGCATGGC	7	3341216	rs560430423	G	T
ENST00000390344.2	-	GAAGGCATGCG	7	38389422	rs184178181	G	A
ENST00000005257.2	+	CACAAAATGGC	7	39726270	rs148748965	G	A
ENST00000223321.4	-	GTAAAGATGGC	7	42971763	rs370136472	C	A
ENST00000442788.1	-	GTAAAGATGGC	7	42971763	rs370136472	C	A
ENST00000348624.4	+	GGCGTGATGTT	7	4815344	rs142983676	G	A
ENST00000348624.4	+	GGCGTGATGTT	7	4815346	rs146143723	G	C
ENST00000407838.3	+	TTTGGAATGAT	7	54610426	rs149656913	G	A
ENST00000402802.3	-	GACGCGATGAG	7	558642	rs537754268	G	T
ENST00000388975.3	-	TGTAGCATGGC	7	55929686	rs114015652	C	T
ENST00000420713.1	+	AGATTTATGGC	7	57509993	rs117752039	T	G
ENST00000342771.4	+	AGAACCATGGA	7	69064637	rs3735260	A	G
ENST00000453152.1	-	GTGTGGATGGC	7	72738791	rs559604741	C	A
ENST00000336926.6	-	GGCGACATGGA	7	75368242	rs114903798	G	A
ENST00000433511.2	+	GCAGCAATGTT	7	7712999	rs77667086	A	G
ENST00000450689.2	-	ACGAAGATGCT	7	86688834	rs143834627	G	A
ENST00000265723.4	-	GCTGAGATGGA	7	87104782	rs45449704	C	T
ENST00000265724.3	-	GTCGGAATGGA	7	87229501	rs2214102	T	C
ENST00000265724.3	-	GTCGGAATGGA	7	87229504	rs34834348	G	A
ENST00000222511.6	+	GCAGCCATGGT	7	89976051	rs11563905	C	T
ENST00000424848.2	-	GGCGGCATGGA	7	92462641	rs368726813	G	T
ENST00000426151.1	-	TCAAAAATGAG	7	93116299	rs2301680	A	G
ENST00000222572.3	-	CGCGCCATGGG	7	95064268	rs17876183	C	T
ENST00000324972.6	+	ACCAACATGTC	7	95434041	rs576252607	C	T
ENST00000416240.2	-	CGAATCATGGC	7	95951267	rs541276426	A	G
ENST00000432641.2	+	GGCGCTATGCC	7	96747032	rs148234166	C	T
ENST00000314018.2	+	AGGGCCATGAA	7	97841618	rs10270045	G	C
ENST00000252725.5	+	GCCGCCATGGC	7	98983334	rs73710452	C	T
ENST00000303887.5	-	GCAGCGATGGC	7	99698918	rs534812375	C	T
ENST00000520539.1	-	AGCACCATGAC	8	103424464	rs115842451	G	A
ENST00000351513.2	-	CTCGCTATGGC	8	105479149	rs2959023	A	G
ENST00000276659.5	-	GCCCAGATGCA	8	109094872	rs182423206	C	T
ENST00000525043.2	+	ACCAAGATGGA	8	11618925	rs77687118	G	C
ENST00000220584.4	+	GCCAGGATGGA	8	11660337	rs200934637	C	T
ENST00000527396.1	-	GGAGTCATGGC	8	11872560	rs111242314	A	G
ENST00000333796.3	-	GGCGACATGGA	8	11996270	rs199737005	G	A
ENST00000399018.1	+	AAGGGGATGTT	8	124968243	rs74403458	T	C
ENST00000276689.3	+	GCCGTAATGGC	8	125551431	rs576180546	G	A
ENST00000262283.5	-	ACGCGCATGAA	8	133097807	rs6996486	G	A
ENST00000507535.3	+	GCCACCATGGG	8	140944529	rs529413873	C	T
ENST00000507535.3	+	GCCACCATGGG	8	140944530	rs550850669	A	G
ENST00000329397.1	+	GGCGCCATGGC	8	142432338	rs201548699	G	T
ENST00000292430.6	+	GGGACGATGGC	8	143781941	rs112093446	G	A
ENST00000330701.4	+	AGAATGATGGA	8	144332012	rs6558339	T	C
ENST00000340490.3	-	AGCAGGATGGC	8	144660494	rs148147715	T	A
ENST00000532796.1	+	GGAAAGATGAT	8	144732044	rs145332985	T	C
ENST00000308860.6	+	TCGGAGATGTG	8	145597780	rs201116950	C	T
ENST00000301332.2	+	GCTCCCATGTA	8	145691802	rs201514776	C	T
ENST00000524821.1	-	AGGAGAATGTG	8	145754306	rs370223267	T	G
ENST00000331222.4	+	TGGACAATGAA	8	1719221	rs143730802	A	G
ENST00000519685.1	+	AGAGCGATGCA	8	22852096	rs78886842	G	A
ENST00000276440.7	+	GCCGCCATGGC	8	25042419	rs141355138	C	T
ENST00000380629.2	+	CCGACAATGTC	8	26240646	rs1055479	A	G
ENST00000305364.4	-	CGTGCCATGGA	8	27168758	rs200729724	G	C
ENST00000413272.2	-	CAAGGAATGGC	8	27931929	rs9987291	C	T
ENST00000287701.10	+	TAAAGTATGCT	8	28821380	rs143238324	A	G
ENST00000287701.10	+	TAAAGTATGCT	8	28821385	rs548313820	A	G
ENST00000330539.1	-	CGGTCAATGGC	8	37594017	rs559294895	G	A
ENST00000338825.4	+	GAGACCATGTC	8	37888090	rs146327581	C	T
ENST00000535263.1	-	GCCGGCATGGG	8	41166681	rs189624457	C	T
ENST00000520810.1	+	ATCAGTATGAG	8	42129617	rs147419440	G	T
ENST00000413219.2	+	GCAAAAATGTC	8	59477590	rs188819245	A	C
ENST00000320270.2	+	GGAGCCATGGA	8	67341362	rs144911629	G	T
ENST00000297439.3	-	GTCGCCATGAG	8	6735382	rs185550983	C	T
ENST00000563496.1	-	GCTGCCATGGA	8	67874005	rs112717882	G	C
ENST00000260126.3	-	AGCGCCATGGA	8	70744912	rs3750267	G	T
ENST00000256103.2	-	ATCACGATGAG	8	82359626	rs185314748	A	G
ENST00000406452.3	-	CAGGTCATGGC	8	87520846	rs141308396	C	A
ENST00000518476.1	+	ATCAAGATGCC	8	87878725	rs78702891	T	C
ENST00000391679.1	+	TGAAGTATGGT	8	95559050	rs533530232	G	A
ENST00000414645.2	+	GAAACGATGGC	8	95732231	rs143132758	C	T
ENST00000254898.5	+	TTGAAAATGGA	8	98900328	rs11559203	A	G
ENST00000317173.4	+	CCTCCCATGCT	8	9912029	rs180876546	G	T
ENST00000375128.4	-	CCAGAGATGGC	9	100459578	rs1800975	T	C
ENST00000375119.3	-	GTAGCCATGCG	9	100684778	rs199804891	C	T
ENST00000375064.1	-	GCAGCGATGGA	9	101017823	rs200829691	T	C
ENST00000375018.1	-	GCGGCGATGGG	9	101558774	rs540601094	C	T
ENST00000375018.1	-	GCGGCGATGGG	9	101558777	rs560421745	C	A
ENST00000374994.4	+	GGGACCATGGA	9	101867486	rs200224304	C	T
ENST00000374874.3	+	TGAGAAATGGC	9	103947774	rs377112102	G	A
ENST00000374855.4	-	GTCACCATGGC	9	104193170	rs560091436	G	A
ENST00000334077.3	+	TCAAACATGAC	9	108424773	rs201145548	C	G
ENST00000374667.3	-	AGGCAGATGGC	9	111618209	rs17728850	A	G
ENST00000238379.5	-	TCCTCCATGGC	9	116136636	rs7867017	G	T
ENST00000374165.1	+	CTAGCTATGGA	9	116175771	rs186126933	G	C
ENST00000374050.3	+	GCCGCCATGGC	9	117350115	rs564653861	C	G
ENST00000374050.3	+	GCCGCCATGGC	9	117350117	rs530588639	C	G
ENST00000382500.2	-	TCCGCCATGAA	9	118123	rs12347535	G	A
ENST00000349780.4	-	GTAGCCATGAT	9	123342259	rs932975	C	A
ENST00000373764.3	+	GGCGCCATGGA	9	124922250	rs72767777	C	T
ENST00000361436.5	-	TCCACCATGCC	9	130213601	rs3808834	G	A
ENST00000372853.4	+	CTCAACATGGC	9	131133656	rs201029924	C	T
ENST00000372648.5	+	AACACCATGTC	9	131549631	rs558789158	C	A
ENST00000372599.3	+	TGAACCATGAT	9	131669442	rs55689326	C	T
ENST00000372491.2	-	GGGAGCATGGA	9	131940337	rs182662078	C	T
ENST00000334909.3	+	GACGCTATGTC	9	133327612	rs138350285	C	T
ENST00000355048.2	+	TTGACCATGGC	9	133884600	rs137883250	C	T
ENST00000372271.3	-	CTTTCAATGCC	9	134151571	rs551924044	A	G
ENST00000298545.3	-	GGCTACATGGA	9	135753641	rs376579655	A	C
ENST00000491289.1	-	TCAGCCATGGC	9	136213521	rs616836	T	C
ENST00000303407.6	-	CGGAGGATGTC	9	136918605	rs199553332	G	A
ENST00000291744.6	+	GAAGAGATGGA	9	137772664	rs17514136	A	G
ENST00000425225.1	-	GAGTTCATGGC	9	138591319	rs117497154	C	G
ENST00000371756.3	-	GGCGGGATGTT	9	138853009	rs373488037	C	T
ENST00000358701.5	-	TCCAACATGGC	9	139137653	rs534829451	G	A
ENST00000438078.1	+	GGGAGCATGGA	9	139142487	rs73560758	G	A
ENST00000341206.4	-	GGGAGGATGGG	9	139642938	rs373531856	T	C
ENST00000247665.10	+	AGGAACATGGC	9	139743882	rs150440929	C	T
ENST00000409687.3	-	GCGCCCATGGC	9	139964917	rs115453697	G	A
ENST00000445101.2	+	GAGCCCATGCA	9	140122792	rs562531003	A	G
ENST00000341349.2	+	GCCGCCATGGC	9	140317979	rs117554356	G	T
ENST00000406427.1	-	CTGGCCATGGA	9	140444651	rs78784297	G	A
ENST00000380683.1	-	TTTTCCATGGA	9	16253101	rs41311418	G	C
ENST00000380534.4	-	GCCCCTATGAA	9	19032907	rs17810415	A	G
ENST00000380502.3	-	GCGAGGATGAG	9	19102646	rs145804356	T	C
ENST00000449498.1	-	ATATCTATGAT	9	21368009	rs189163871	T	C
ENST00000276927.1	+	TCTACGATGGC	9	21440504	rs150468290	A	G
ENST00000498124.1	-	AGCAGCATGGA	9	21974828	rs191394143	C	T
ENST00000382082.3	+	GCAGCCATGCT	9	2717738	rs75316505	C	T
ENST00000379883.2	-	GCCGGCATGAC	9	32526169	rs199589718	G	A
ENST00000342743.5	+	TGAAACATGCG	9	32784181	rs61744323	C	G
ENST00000360802.1	-	CTGTATATGAT	9	34017151	rs188589471	A	G
ENST00000353704.2	+	TCCCAAATGGA	9	35732769	rs62620195	A	G
ENST00000377798.4	+	GGCGAGATGGC	9	37486042	rs147983938	G	C
ENST00000242275.6	-	AGCAGCATGAT	9	37888552	rs201543549	C	A
ENST00000377564.3	+	GTGAGCATGGC	9	43685298	rs62558062	G	T
ENST00000377525.1	-	TTCAGGATGGG	9	46387008	rs200904791	A	G
ENST00000381641.3	-	ACAGGGATGCC	9	5185608	rs201241802	T	C
ENST00000239316.4	+	TCCAGGATGGC	9	5231525	rs7024833	T	C
ENST00000355513.4	-	CAGTGTATGCC	9	6468738	rs533104344	G	T
ENST00000355513.4	-	CAGTGTATGCC	9	6468739	rs146564956	C	G
ENST00000382405.3	-	GCCGGAATGTT	9	70490066	rs184251084	C	G
ENST00000377197.3	+	GCTCCCATGGA	9	72435792	rs61146180	T	C
ENST00000377182.4	+	GCGACCATGCT	9	72659117	rs150671682	C	T
ENST00000376552.2	+	GCTTGGATGAT	9	82187706	rs544271498	A	G
ENST00000376371.2	-	TTTACGATGGC	9	86421433	rs137906175	C	T
ENST00000376371.2	-	TTTACGATGGC	9	86421436	rs368666812	A	T
ENST00000375991.4	-	GCGAAGATGTC	9	88897375	rs376706009	T	G
ENST00000343150.5	+	TAAAACATGAA	9	90342523	rs112682750	A	C
ENST00000356444.2	-	TACCTGATGAG	9	92020369	rs138210998	C	T
ENST00000375412.5	-	AATAGGATGGG	9	96214992	rs143975148	C	T
ENST00000288976.3	+	AGTGCCATGCA	9	96846815	rs141774827	G	A
ENST00000288985.7	+	TGTTACATGCA	9	98638288	rs690528	A	G
ENST00000394810.2	-	TGAGCGATGGG	10	75415677	rs60632610	C	G,T
ENST00000486207.1	-	GGTGTCATGGG	11	14992735	rs34587547	C	G,T
ENST00000367727.4	+	TGAAAGATGGA	1	172390021	rs146005600	G	A,C
ENST00000228928.7	+	GCGGCCATGGA	12	113376331	rs1859331	C	A,G,T
ENST00000366835.3	-	GGCGCGATGAT	1	226065283	rs80024826	C	A,T
ENST00000366628.4	+	ACCAGTATGGC	1	233086456	rs13381	T	A,C,G
ENST00000336854.4	+	TGCAGGATGAA	12	52467430	rs376715731	G	A,T
ENST00000409874.4	+	TTGAGGATGCT	14	104394850	rs9324066	C	A,G,T
ENST00000409393.2	+	GCCGTCATGCC	14	105953595	rs7140395	T	A,C,G
ENST00000477724.2	+	GCCGTCATGCC	14	105953595	rs7140395	T	A,C,G
ENST00000416007.2	-	GATATCATGGC	14	36789795	rs11558802	G	A,C,T
ENST00000555562.1	+	ATTACGATGCG	14	89884022	rs7422	A	C,G,T
ENST00000267807.7	-	AGCTTGATGGG	15	56999311	rs147737624	G	C,T
ENST00000371225.2	-	CCCACCATGGC	1	59042829	rs232836	G	C,T
ENST00000268042.6	+	GGCGGGATGGG	15	98504088	rs114245019	C	A,T
ENST00000199708.2	+	GCGGGGATGGC	16	230481	rs1005364	C	G,T
ENST00000258169.4	-	GCTACCATGGC	16	82203786	rs2303260	C	G,T
ENST00000316694.3	-	AGTGCAATGAC	17	18259294	rs143807950	A	C,T
ENST00000323322.5	-	GCTGCAATGGC	17	61996140	rs6173	A	C,G
ENST00000423034.2	+	GCCATCATGTC	17	75369578	rs7217986	T	A,C
ENST00000343625.6	-	CCAACCATGGA	19	15575174	rs76267899	G	A,T
ENST00000221403.2	+	GCAACCATGGC	19	49436979	rs368832079	A	G,T
ENST00000370185.3	+	CGCTGCATGCA	1	99730009	rs712896	C	A,T
ENST00000351817.4	-	CGAGCCATGTC	20	21378043	rs200359338	G	C,T
ENST00000324384.3	-	ACACATATGGT	20	44279239	rs554389358	T	A,C
ENST00000291547.4	+	TGAACCATGAT	21	44424490	rs146858763	C	A,T
ENST00000447353.1	-	AGCATCATGGA	2	170550839	rs3820952	A	C,G,T
ENST00000252137.6	-	ATAGCGATGGA	22	19132155	rs5992371	G	C,T
ENST00000407689.3	-	GCCGCGATGGA	22	30685488	rs377466763	G	A,T
ENST00000296511.5	-	GTCGCCATGGC	4	122617745	rs1131239	G	A,C,T
ENST00000265404.2	+	AGGGGTATGAT	4	68424532	rs141604937	T	A,C
ENST00000264954.4	-	GCAGTCATGGC	4	7069760	rs377492651	G	A,C
ENST00000196371.5	-	CCGAAGATGGC	5	41870465	rs200129807	G	A,C
ENST00000323865.3	-	GCAGGCATGGA	5	63257548	rs149336657	C	G,T
ENST00000361822.3	+	CGGGTAATGGC	7	111846771	rs142246587	A	C,G
ENST00000432641.2	+	GGCGCTATGCC	7	96747038	rs376842534	G	A,C,T
ENST00000285518.6	+	GAGAAGATGCT	8	6566186	rs2911984	G	A,C
